# Supplementary material for: Screening of Natural Product Derivatives Identifies Two Structurally Related Flavonoids as Potent Quorum Sensing Inhibitors against Gram-Negative Bacteria
Source: MDPI journal article supplement (doi:10.3390/ijms19051346), 2018-05-03

**Supplementary table 1.** Compound codes, IUPAC names, inhibition percentages and structures of the quorum quenchers (QQs) identified in the primary screening. Structures are drawn using ACD/ChemSketch software.

| Compound | Compound code (supplier) and IUPAC name                                                                                 | Inhibition-% against <i>C. violaceum</i> CV026 | Structure                                                                             |
|----------|-------------------------------------------------------------------------------------------------------------------------|------------------------------------------------|---------------------------------------------------------------------------------------|
| 712      | ST055915<br>2-{1-[(4-chlorophenyl)carbonyl]-5-methoxy-2-methylindol-3-yl}-N-(3-piperidylpropyl)acetamide                | 94.3                                           | 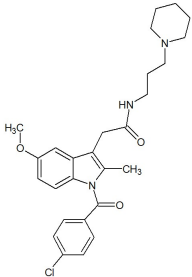   |
| 1016     | ST070387<br>methyl 5-cyano-2-methyl-6-sulfanyl-4-(3,4,5-trimethoxyphenyl)-1,4-dihydropyridine-3-carboxylate, morpholine | 97.5                                           |   |
| 1214     | ST072415<br>2-[(2,5-dimethyl(3-furyl))carbonylamino]-3-phenylpropanoic acid                                             | 103.0                                          |  |
| 1352     | ST074558<br>3-(4-dichlorophenyl)-4,7-dimethylchromen-2-one                                                              | 99.6                                           |  |

|      |                                                                                                            |       |                                                                                       |
|------|------------------------------------------------------------------------------------------------------------|-------|---------------------------------------------------------------------------------------|
| 1406 | <b>ST074754</b><br>2-[4-(N,N-diethylcarbamoyl)-2-oxohydroquinolyl]-N-(2,4,6-trimethylphenyl)acetamide      | 93.3  | 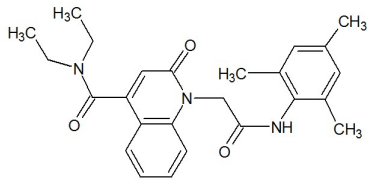   |
| 1508 | <b>ST075134</b><br>N-(3-ethyl-4-oxo(3-hydroquinazolin-7-yl))(3,4,5-trimethoxyphenyl)carboxamide            | 93.4  |    |
| 1852 | <b>ST078265</b><br>6-ethoxy-4-(piperazinylmethyl)chromen-2-one                                             | 95.2  |    |
| 1905 | <b>ST078576</b><br>N-(3-chloro-4-fluorophenyl)-2-[6-oxo-9-(oxolan-2-ylmethyl)hydropurin-8-ylthio]acetamide | 106.7 |  |
| 2372 | <b>ST092296</b><br>(2E)-1-(4-hydroxy-2-methylphenyl)-3-(4-methoxyphenyl)prop-2-en-1-one                    | 91.1  |  |
| 2584 | <b>ST095355</b><br>2-(2-piperidyl)acetamide                                                                | 106.4 |  |

|      |                                                                                         |       |                                                                                       |
|------|-----------------------------------------------------------------------------------------|-------|---------------------------------------------------------------------------------------|
| 2666 | ST007136<br>4-ethoxy-1-(1,2,3,4-tetrahydrobeta-carbolinyl)benzene                       | 90.8  | 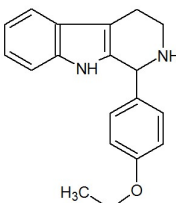   |
| 2712 | ST034304<br>2-(trichloromethyl)chromen-4-one                                            | 106.2 |    |
| 2909 | ST081483<br>3-(2-methoxyphenyl)-4-oxo-2-(trifluoromethyl)chromen-7-yl 2-fluorobenzoate  | 99.9  |   |
| 2916 | ST081723<br>3-(3-fluorophenyl)-N-[2-hydroxy-1-(hydroxymethyl)-2-phenylethyl]propanamide | 98.3  |  |

---

**Supplementary table 2.** Primary screening of NDL-3040 library.

| Cpd | Company ID | Inhibition of violacein (%) |       | Inhibition of viability (%) |       |
|-----|------------|-----------------------------|-------|-----------------------------|-------|
|     |            | ATCC                        | CV026 | ATCC                        | CV026 |
| 1   | ST000055   |                             |       |                             |       |
| 2   | ST000291   | 19.0                        |       |                             |       |
| 3   | ST001314   | 41.0                        | 41.3  |                             |       |
| 4   | ST001350   |                             |       |                             |       |
| 5   | ST001351   | 8.1                         | 21.9  |                             |       |
| 6   | ST001454   |                             | 13.0  | 51.3                        |       |
| 7   | ST001455   | 25.4                        | 8.2   |                             |       |
| 8   | ST001456   | 4.9                         |       |                             | 43.9  |
| 9   | ST001458   |                             | 7.6   |                             | 47.9  |
| 10  | ST001460   | 17.2                        |       |                             | 51.2  |
| 11  | ST001462   |                             |       |                             |       |
| 12  | ST001503   |                             |       |                             |       |
| 13  | ST001557   |                             |       |                             |       |
| 14  | ST001560   | 99.1                        | 35.3  | 40.1                        | 48.6  |
| 15  | ST001561   |                             |       |                             |       |
| 16  | ST001577   |                             |       | 60.9                        |       |
| 17  | ST001593   |                             |       |                             | 65.5  |
| 18  | ST001626   | 8.3                         | 83.7  |                             |       |
| 19  | ST001635   |                             |       |                             |       |
| 20  | ST001691   |                             | 31.6  |                             |       |
| 21  | ST001732   | 7.3                         | 31.4  |                             |       |
| 22  | ST001875   | 14.9                        | 5.4   |                             |       |
| 23  | ST001922   |                             |       | 48.0                        |       |
| 24  | ST001934   | 10.7                        |       | 60.2                        |       |
| 25  | ST001941   | 33.3                        | 6.8   |                             |       |
| 26  | ST002011   | 66.0                        | 57.6  |                             |       |
| 27  | ST002046   |                             | 22.1  |                             |       |
| 28  | ST002048   |                             |       |                             |       |
| 29  | ST002049   |                             |       |                             |       |
| 30  | ST002075   | 12.1                        | 27.4  |                             |       |
| 31  | ST002086   |                             |       |                             |       |
| 32  | ST002217   | 2.4                         | 1.1   | 44.6                        | 42.6  |
| 33  | ST002232   | 48.7                        | 2.8   |                             | 47.8  |
| 34  | ST002262   |                             | 33.9  |                             |       |
| 35  | ST002321   |                             | 16.3  |                             | 58.9  |
| 36  | ST002489   |                             | 43.2  |                             |       |
| 37  | ST002695   |                             |       |                             |       |
| 38  | ST002729   |                             |       |                             | 51.1  |
| 39  | ST002734   | 80.4                        | 51.8  | 46.2                        |       |
| 40  | ST002787   | 18.7                        | 15.7  |                             |       |
| 41  | ST002793   |                             | 39.0  |                             | 64.6  |
| 42  | ST002794   |                             | 27.3  |                             | 44.2  |
| 43  | ST002795   |                             |       |                             |       |
| 44  | ST002796   | 3.9                         | 34.5  |                             |       |
| 45  | ST002797   |                             | 5.4   |                             |       |
| 46  | ST002799   |                             |       |                             |       |

|    |          |      |      |      |      |
|----|----------|------|------|------|------|
| 47 | ST002870 |      | 26.5 |      |      |
| 48 | ST002875 | 6.8  | 21.7 |      |      |
| 49 | ST002905 | 86.8 | 96.9 |      |      |
| 50 | ST002906 | 69.9 | 87.6 |      |      |
| 51 | ST003334 | 32.6 | 54.3 |      |      |
| 52 | ST003848 |      | 1.9  |      |      |
| 53 | ST004334 | 88.2 | 77.6 |      |      |
| 54 | ST004335 | 95.9 | 79.1 |      |      |
| 55 | ST004388 |      |      |      |      |
| 56 | ST004882 |      |      | 57.3 |      |
| 57 | ST005054 | 6.3  |      |      |      |
| 58 | ST005055 |      |      |      |      |
| 59 | ST005056 |      |      |      |      |
| 60 | ST005058 | 19.5 | 35.1 |      |      |
| 61 | ST005059 |      |      |      |      |
| 62 | ST005063 |      | 15.6 |      |      |
| 63 | ST005069 |      | 4.4  |      |      |
| 64 | ST005078 | 8.1  |      |      |      |
| 65 | ST005080 |      | 17.0 | 47.5 |      |
| 66 | ST005085 |      | 40.9 |      |      |
| 67 | ST005086 |      |      |      |      |
| 68 | ST005087 |      | 14.2 | 51.2 |      |
| 69 | ST005092 |      |      |      |      |
| 70 | ST005106 |      | 9.2  |      |      |
| 71 | ST005109 | 0.3  |      |      |      |
| 72 | ST005114 | 28.7 | 71.8 |      |      |
| 73 | ST005130 | 85.9 | 86.3 | 47.3 |      |
| 74 | ST005132 | 92.3 | 26.2 | 42.5 |      |
| 75 | ST005133 | 91.2 | 16.4 |      |      |
| 76 | ST005134 | 77.1 | 32.0 |      |      |
| 77 | ST005135 | 57.3 | 29.3 |      |      |
| 78 | ST005136 | 88.1 | 50.8 |      |      |
| 79 | ST005138 | 67.9 | 28.4 |      |      |
| 80 | ST005179 |      | 19.6 |      |      |
| 81 | ST005183 | 63.4 | 49.9 | 46.0 | 52.9 |
| 82 | ST005185 | 54.8 | 27.1 | 51.5 |      |
| 83 | ST005186 | 59.4 | 56.4 | 57.5 |      |
| 84 | ST005190 | 56.7 | 55.1 | 52.8 |      |
| 85 | ST005197 | 49.6 | 46.9 |      |      |
| 86 | ST005199 | 53.8 | 58.3 |      |      |
| 87 | ST005200 | 57.8 | 62.3 | 47.7 | 43.7 |
| 88 | ST005201 | 64.4 | 45.3 | 74.0 | 43.9 |
| 89 | ST005206 | 46.8 | 24.5 | 59.8 |      |
| 90 | ST005208 | 54.6 | 41.0 |      |      |
| 91 | ST005211 | 51.8 | 20.5 | 57.1 |      |
| 92 | ST005213 | 57.7 | 43.5 | 49.6 |      |
| 93 | ST005216 | 67.3 | 11.4 |      | 43.5 |
| 94 | ST005222 | 52.6 | 10.2 | 40.8 |      |
| 95 | ST005223 | 52.8 | 16.9 | 46.1 | 52.3 |
| 96 | ST005635 | 65.5 | 42.5 | 73.2 | 51.3 |
| 97 | ST005846 | 48.5 | 30.5 | 52.1 |      |

|     |          |      |      |       |      |
|-----|----------|------|------|-------|------|
| 98  | ST005872 | 52.8 | 41.3 | 73.4  |      |
| 99  | ST005874 | 57.5 | 36.7 | 58.5  |      |
| 100 | ST005893 | 53.8 | 36.0 | 64.3  |      |
| 101 | ST005930 | 89.0 | 55.0 |       |      |
| 102 | ST006037 | 55.6 | 10.6 | 60.6  | 50.4 |
| 103 | ST006587 | 55.0 | 64.2 |       | 57.4 |
| 104 | ST006593 | 58.2 | 44.6 | 53.0  |      |
| 105 | ST007000 | 53.6 | 17.9 | 46.6  | 55.0 |
| 106 | ST007035 | 99.0 | 99.9 | 99.3  | 99.5 |
| 107 | ST007286 | 58.9 | 32.3 |       | 60.1 |
| 108 | ST007299 | 61.2 | 56.8 |       |      |
| 109 | ST007922 | 69.9 | 39.6 |       |      |
| 110 | ST007974 | 60.1 | 30.3 |       | 50.0 |
| 111 | ST008364 | 60.5 | 34.1 |       |      |
| 112 | ST008365 | 66.0 | 56.8 |       |      |
| 113 | ST008598 | 54.0 | 15.0 |       | 61.0 |
| 114 | ST008655 | 59.2 | 28.0 |       | 46.0 |
| 115 | ST008666 | 63.0 | 35.4 | 58.9  | 45.9 |
| 116 | ST008985 | 55.0 | 37.0 | 64.4  |      |
| 117 | ST008990 | 68.6 | 49.5 |       |      |
| 118 | ST009494 | 82.6 | 79.2 | 62.1  | 73.2 |
| 119 | ST009820 | 87.0 | 88.7 |       |      |
| 120 | ST009866 | 64.7 | 35.0 |       |      |
| 121 | ST009869 | 65.4 | 37.4 | 51.8  | 59.1 |
| 122 | ST009872 | 46.4 | 25.2 |       |      |
| 123 | ST010134 | 46.0 | 26.0 |       |      |
| 124 | ST010178 | 49.9 | 56.6 |       |      |
| 125 | ST010196 | 61.7 | 38.2 |       |      |
| 126 | ST010199 | 48.9 | 30.1 |       | 46.2 |
| 127 | ST010204 | 40.7 | 7.2  | 45.0  | 51.4 |
| 128 | ST010548 | 70.4 | 53.6 |       |      |
| 129 | ST010639 | 46.2 | 44.1 | 58.6  |      |
| 130 | ST010647 | 53.9 | 69.8 | 72.7  |      |
| 131 | ST010648 | 59.5 | 34.9 | 54.6  |      |
| 132 | ST011269 | 50.3 | 30.9 | 74.3  |      |
| 133 | ST011381 | 57.4 | 49.3 | 69.0  |      |
| 134 | ST011566 | 66.1 | 43.1 |       |      |
| 135 | ST011915 | 44.3 | 4.5  | 67.4  |      |
| 136 | ST011916 | 55.3 | 22.8 | 101.5 |      |
| 137 | ST011966 | 42.5 | 6.7  |       | 51.9 |
| 138 | ST011968 | 36.7 | 26.1 |       | 57.5 |
| 139 | ST011982 | 45.5 | 18.9 |       | 57.1 |
| 140 | ST012102 | 54.9 | 49.2 | 52.2  |      |
| 141 | ST012322 | 50.8 | 46.8 | 45.4  |      |
| 142 | ST012373 | 46.3 | 15.2 | 56.1  | 43.5 |
| 143 | ST012388 | 51.8 | 11.4 |       | 49.3 |
| 144 | ST012391 | 94.7 | 97.2 |       |      |
| 145 | ST012395 | 59.7 |      |       | 51.5 |
| 146 | ST012416 | 43.9 | 22.1 |       | 60.6 |
| 147 | ST012454 | 46.9 | 21.6 |       |      |
| 148 | ST012706 | 51.7 | 57.2 |       |      |

|     |          |      |      |      |       |
|-----|----------|------|------|------|-------|
| 149 | ST012707 | 46.8 | 50.8 |      |       |
| 150 | ST012714 | 58.6 | 20.4 |      | 53.9  |
| 151 | ST012799 | 60.3 | 22.5 |      | 49.1  |
| 152 | ST012804 | 71.6 | 96.9 |      |       |
| 153 | ST012873 | 40.0 | 8.9  |      | 67.9  |
| 154 | ST012882 | 76.6 | 78.8 |      | 56.5  |
| 155 | ST012883 | 51.2 |      |      | 42.9  |
| 156 | ST012885 | 92.3 | 68.5 | 46.7 | 75.7  |
| 157 | ST012886 | 96.7 | 56.1 |      | 61.6  |
| 158 | ST012887 | 87.4 | 64.2 |      | 54.9  |
| 159 | ST012891 | 87.1 | 83.6 |      | 52.8  |
| 160 | ST012892 | 97.4 | 90.2 | 47.2 | 68.8  |
| 161 | ST012900 | 41.9 | 36.8 |      | 56.6  |
| 162 | ST012915 | 26.7 | 45.7 |      |       |
| 163 | ST012935 | 2.8  |      | 40.4 | 45.5  |
| 164 | ST012939 | 98.6 | 95.4 |      | 98.5  |
| 165 | ST012940 | 96.1 | 82.0 | 83.5 | 101.3 |
| 166 | ST012949 | 54.0 | 55.0 |      |       |
| 167 | ST012956 | 92.7 | 69.1 |      |       |
| 168 | ST012957 | 90.1 | 84.6 |      |       |
| 169 | ST012960 | 97.0 | 96.9 | 98.3 | 98.1  |
| 170 | ST013021 | 54.0 | 83.7 |      |       |
| 171 | ST013038 | 35.5 | 78.7 |      |       |
| 172 | ST013043 |      | 70.3 |      |       |
| 173 | ST013044 | 40.4 |      |      |       |
| 174 | ST013114 |      | 47.9 |      |       |
| 175 | ST013134 |      | 53.5 |      |       |
| 176 | ST013141 |      | 34.7 |      |       |
| 177 | ST013145 | 32.5 | 67.6 |      |       |
| 178 | ST013165 |      | 29.8 |      |       |
| 179 | ST013170 | 14.3 | 59.8 |      |       |
| 180 | ST013172 |      | 61.2 |      |       |
| 181 | ST013175 |      | 41.2 |      |       |
| 182 | ST013195 | 74.8 | 95.1 |      |       |
| 183 | ST013222 | 62.7 | 74.0 |      |       |
| 184 | ST013224 | 11.8 | 47.3 |      |       |
| 185 | ST013226 | 22.8 | 65.8 |      |       |
| 186 | ST013233 |      | 54.1 |      |       |
| 187 | ST013299 |      | 52.6 |      |       |
| 188 | ST013307 | 19.0 | 46.2 |      |       |
| 189 | ST013313 | 8.4  | 44.5 |      |       |
| 190 | ST013335 | 52.1 | 79.8 |      |       |
| 191 | ST013336 | 9.3  | 65.2 |      |       |
| 192 | ST013355 |      | 65.2 |      |       |
| 193 | ST013357 |      | 19.3 |      |       |
| 194 | ST013362 |      | 31.6 |      |       |
| 195 | ST013440 |      | 38.6 | 40.1 |       |
| 196 | ST013845 | 9.3  | 40.1 |      |       |
| 197 | ST013859 |      | 52.0 |      |       |
| 198 | ST013863 | 6.1  | 80.2 |      |       |
| 199 | ST013865 |      | 89.2 | 52.7 |       |

|     |          |      |      |      |      |
|-----|----------|------|------|------|------|
| 200 | ST013874 | 13.9 | 38.2 | 41.7 |      |
| 201 | ST013875 | 20.6 | 48.5 |      |      |
| 202 | ST013885 |      | 33.6 |      |      |
| 203 | ST014085 |      | 51.9 |      |      |
| 204 | ST014287 |      | 54.3 |      |      |
| 205 | ST014351 | 12.0 | 55.1 |      |      |
| 206 | ST014439 |      | 72.9 |      |      |
| 207 | ST014458 |      | 20.1 |      |      |
| 208 | ST014701 | 32.3 | 59.1 |      |      |
| 209 | ST014848 | 46.6 | 67.6 |      |      |
| 210 | ST014917 | 39.5 | 61.7 |      |      |
| 211 | ST015000 | 44.1 | 37.3 |      |      |
| 212 | ST015003 |      | 55.8 |      |      |
| 213 | ST015022 |      | 59.1 |      |      |
| 214 | ST015025 |      | 55.9 |      |      |
| 215 | ST015028 |      | 41.0 | 41.8 |      |
| 216 | ST015061 | 3.5  | 59.5 |      |      |
| 217 | ST015079 | 25.1 | 74.4 | 58.1 | 98.2 |
| 218 | ST015082 | 16.7 | 66.0 |      |      |
| 219 | ST015143 | 59.7 | 62.2 |      |      |
| 220 | ST015200 |      | 62.1 |      |      |
| 221 | ST015213 | 52.4 | 68.6 |      |      |
| 222 | ST015228 | 21.4 | 61.8 |      |      |
| 223 | ST015229 | 12.2 | 54.3 |      |      |
| 224 | ST016345 | 37.6 | 56.7 |      |      |
| 225 | ST016598 | 89.9 | 98.6 |      |      |
| 226 | ST016609 | 4.9  | 2.8  |      |      |
| 227 | ST016611 | 33.9 | 9.7  |      |      |
| 228 | ST016912 |      | 35.6 |      |      |
| 229 | ST017012 | 43.7 | 56.5 |      |      |
| 230 | ST017050 | 30.9 |      |      |      |
| 231 | ST017055 | 9.3  | 7.9  |      |      |
| 232 | ST017059 | 54.3 |      |      |      |
| 233 | ST017060 | 33.7 | 64.9 |      |      |
| 234 | ST017091 | 26.6 | 65.4 |      |      |
| 235 | ST017117 | 43.0 | 52.3 |      |      |
| 236 | ST017131 |      | 52.6 | 44.0 |      |
| 237 | ST017132 | 65.1 | 76.7 |      |      |
| 238 | ST017140 | 47.5 | 73.4 |      |      |
| 239 | ST017162 | 8.4  | 47.7 |      |      |
| 240 | ST017243 | 51.4 |      |      |      |
| 241 | ST017282 | 13.3 | 11.1 |      |      |
| 242 | ST017363 | 36.8 | 30.1 |      |      |
| 243 | ST017700 | 61.2 | 19.9 | 65.1 |      |
| 244 | ST018357 | 8.8  | 38.0 |      |      |
| 245 | ST018474 | 98.4 | 97.5 | 87.8 |      |
| 246 | ST018508 | 74.3 | 97.7 | 68.3 |      |
| 247 | ST018530 | 60.8 | 0.5  | 61.0 |      |
| 248 | ST018637 | 27.3 | 13.8 |      | 43.9 |
| 249 | ST018723 | 16.7 | 4.7  |      | 47.9 |
| 250 | ST018738 | 7.5  | 2.1  |      | 51.2 |



|     |          |      |      |      |      |
|-----|----------|------|------|------|------|
| 251 | ST018862 | 26.4 | 4.4  |      |      |
| 252 | ST018944 | 19.0 |      |      |      |
| 253 | ST018956 | 46.2 | 35.4 |      |      |
| 254 | ST019060 | 37.8 | 8.7  |      | 48.6 |
| 255 | ST019200 | 36.4 |      |      |      |
| 256 | ST019346 | 98.4 | 74.5 | 66.3 |      |
| 257 | ST019380 | 10.2 | 21.2 |      | 65.5 |
| 258 | ST019494 |      | 2.3  |      |      |
| 259 | ST019500 |      | 17.1 | 59.6 |      |
| 260 | ST019600 |      | 7.2  |      |      |
| 261 | ST019653 | 24.6 | 27.6 |      |      |
| 262 | ST019686 | 48.4 | 0.5  |      |      |
| 263 | ST019691 | 36.6 |      |      |      |
| 264 | ST019694 | 35.3 | 1.0  |      |      |
| 265 | ST019695 | 66.6 | 20.4 |      |      |
| 266 | ST019697 | 43.9 |      |      |      |
| 267 | ST019740 | 18.2 |      |      |      |
| 268 | ST019742 | 15.5 |      |      |      |
| 269 | ST019743 |      |      |      |      |
| 270 | ST019771 | 41.6 |      |      |      |
| 271 | ST019809 | 33.3 | 12.6 |      |      |
| 272 | ST019810 | 62.6 | 55.3 |      | 42.6 |
| 273 | ST019811 | 46.9 | 0.0  | 47.5 | 47.8 |
| 274 | ST019823 | 41.2 | 35.9 |      |      |
| 275 | ST020202 | 31.0 |      |      | 58.9 |
| 276 | ST020536 |      | 8.6  |      |      |
| 277 | ST020706 |      | 12.2 | 70.5 |      |
| 278 | ST020714 |      |      |      | 51.1 |
| 279 | ST020838 | 31.6 | 13.6 |      |      |
| 280 | ST021016 | 50.4 | 35.6 |      |      |
| 281 | ST021061 | 47.3 | 2.4  |      | 64.6 |
| 282 | ST021133 | 35.2 |      | 50.8 | 44.2 |
| 283 | ST021156 | 14.6 |      | 53.3 |      |
| 284 | ST021182 | 48.5 | 19.1 |      |      |
| 285 | ST021190 | 28.1 |      |      |      |
| 286 | ST022015 | 59.6 | 32.3 |      |      |
| 287 | ST022034 | 35.6 | 45.6 | 50.3 |      |
| 288 | ST022146 | 44.1 | 28.6 |      |      |
| 289 | ST022345 | 54.6 | 2.9  |      |      |
| 290 | ST022366 | 16.6 |      |      |      |
| 291 | ST022376 | 31.0 | 7.0  |      |      |
| 292 | ST022472 | 25.5 | 9.6  |      |      |
| 293 | ST022487 | 44.0 |      |      |      |
| 294 | ST022497 |      |      |      |      |
| 295 | ST022505 | 18.0 | 9.9  |      |      |
| 296 | ST022512 |      | 22.5 |      |      |
| 297 | ST022518 | 75.6 | 87.2 |      |      |
| 298 | ST022520 | 89.9 | 65.2 |      |      |
| 299 | ST022533 | 39.4 | 23.2 |      |      |
| 300 | ST022660 | 44.6 | 27.7 |      |      |
| 301 | ST022689 | 65.1 | 78.9 |      |      |

|     |          |      |      |       |      |
|-----|----------|------|------|-------|------|
| 302 | ST023393 | 19.0 | 15.6 |       |      |
| 303 | ST023394 | 64.5 | 19.6 |       |      |
| 304 | ST023411 | 31.3 | 23.0 |       |      |
| 305 | ST023485 | 43.4 |      |       | 47.5 |
| 306 | ST023486 | 17.7 |      |       |      |
| 307 | ST023895 | 55.2 | 27.6 |       |      |
| 308 | ST023898 | 12.5 | 3.8  |       | 51.2 |
| 309 | ST023941 | 27.4 | 17.6 |       |      |
| 310 | ST023988 | 30.3 | 24.6 |       |      |
| 311 | ST023990 | 9.9  |      |       |      |
| 312 | ST024009 | 48.0 | 55.3 |       |      |
| 313 | ST024059 | 48.3 |      |       | 47.3 |
| 314 | ST024082 |      |      | 52.2  | 42.5 |
| 315 | ST024083 | 36.0 |      |       |      |
| 316 | ST024086 | 58.4 | 31.8 |       |      |
| 317 | ST024093 | 25.8 |      |       |      |
| 318 | ST024094 | 35.3 |      |       |      |
| 319 | ST024097 | 3.8  |      |       |      |
| 320 | ST024144 | 45.7 | 25.9 |       |      |
| 321 | ST024291 | 4.1  | 75.3 |       |      |
| 322 | ST024321 | 66.5 | 69.7 |       |      |
| 323 | ST024425 |      | 37.0 |       |      |
| 324 | ST024453 | 21.8 | 46.2 | 53.1  |      |
| 325 | ST024514 | 3.5  | 63.0 | 56.8  |      |
| 326 | ST024526 | 23.8 | 87.2 |       |      |
| 327 | ST024529 | 11.1 | 58.2 |       |      |
| 328 | ST024545 |      | 46.6 |       |      |
| 329 | ST024567 | 19.6 | 41.3 | 60.1  |      |
| 330 | ST024574 | 12.9 |      |       |      |
| 331 | ST024596 | 27.0 | 46.7 |       |      |
| 332 | ST024605 | 4.8  | 32.3 |       |      |
| 333 | ST024616 | 37.2 | 54.8 |       |      |
| 334 | ST024723 | 14.6 | 79.0 | 87.8  |      |
| 335 | ST024725 |      | 44.9 | 68.2  |      |
| 336 | ST024735 | 20.2 | 56.4 |       |      |
| 337 | ST024746 |      | 66.2 | 63.3  | 46.6 |
| 338 | ST024767 | 19.3 | 57.3 | 71.9  |      |
| 339 | ST024776 | 95.6 | 94.7 |       |      |
| 340 | ST024782 | 92.4 | 95.5 | 101.6 |      |
| 341 | ST024784 | 93.4 | 95.2 |       |      |
| 342 | ST024793 | 2.2  | 57.9 |       |      |
| 343 | ST024948 |      | 58.6 |       |      |
| 344 | ST024949 |      | 64.6 |       |      |
| 345 | ST024950 | 38.1 | 44.7 |       |      |
| 346 | ST025067 | 56.1 | 44.7 |       |      |
| 347 | ST025090 | 32.7 | 52.1 |       |      |
| 348 | ST025103 | 3.3  | 48.8 |       |      |
| 349 | ST025230 | 10.9 | 47.3 |       |      |
| 350 | ST025236 | 8.2  | 48.9 |       |      |
| 351 | ST025428 | 23.2 | 64.1 |       |      |
| 352 | ST025481 | 11.0 | 54.5 |       |      |

|     |          |      |      |      |
|-----|----------|------|------|------|
| 353 | ST025534 |      | 30.4 |      |
| 354 | ST025539 | 33.2 | 74.0 |      |
| 355 | ST025549 | 28.4 | 54.2 |      |
| 356 | ST025561 | 5.2  | 44.5 |      |
| 357 | ST025581 |      | 50.1 |      |
| 358 | ST025591 | 14.2 | 70.7 |      |
| 359 | ST025615 | 1.6  | 62.9 |      |
| 360 | ST025699 | 24.4 | 54.5 |      |
| 361 | ST026111 | 32.8 | 68.6 | 45.2 |
| 362 | ST026255 |      | 55.5 |      |
| 363 | ST026551 | 1.6  | 51.9 |      |
| 364 | ST026815 | 32.1 | 75.3 |      |
| 365 | ST026921 | 62.6 | 74.9 |      |
| 366 | ST026922 | 86.0 | 88.2 |      |
| 367 | ST026946 |      | 61.3 |      |
| 368 | ST027058 | 28.1 | 60.8 |      |
| 369 | ST027168 | 2.9  | 54.6 | 65.0 |
| 370 | ST027326 | 1.0  | 77.1 |      |
| 371 | ST027385 | 4.0  | 62.1 |      |
| 372 | ST027388 |      | 58.1 |      |
| 373 | ST027415 | 26.7 | 69.1 |      |
| 374 | ST027493 | 13.0 | 49.8 |      |
| 375 | ST027509 | 6.4  | 54.7 |      |
| 376 | ST027530 |      | 62.8 |      |
| 377 | ST027561 | 41.1 | 49.0 |      |
| 378 | ST027719 |      | 36.2 |      |
| 379 | ST028394 | 24.6 | 70.9 |      |
| 380 | ST028455 |      | 44.5 |      |
| 381 | ST028624 |      | 54.7 |      |
| 382 | ST028626 | 2.8  | 39.1 |      |
| 383 | ST028644 |      | 51.0 |      |
| 384 | ST028708 | 39.7 | 62.4 |      |
| 385 | ST028777 |      | 75.2 |      |
| 386 | ST028823 |      | 44.5 |      |
| 387 | ST029018 | 19.1 | 64.8 |      |
| 388 | ST029234 | 11.4 | 73.2 |      |
| 389 | ST029446 | 13.6 | 60.5 | 91.0 |
| 390 | ST029463 | 17.1 | 71.1 |      |
| 391 | ST029579 | 35.3 | 67.6 |      |
| 392 | ST029634 | 19.6 | 57.8 |      |
| 393 | ST029675 | 88.6 | 98.4 | 64.7 |
| 394 | ST029711 |      | 64.9 |      |
| 395 | ST029713 | 17.2 | 69.7 |      |
| 396 | ST029810 | 2.5  | 63.1 |      |
| 397 | ST029812 |      | 71.1 | 54.2 |
| 398 | ST029852 |      | 74.4 | 65.4 |
| 399 | ST029862 |      | 71.8 | 65.1 |
| 400 | ST029877 | 47.6 | 81.9 |      |
| 401 | ST029879 | 3.4  | 21.4 | 47.2 |
| 402 | ST029892 | 17.1 | 46.0 |      |
| 403 | ST029917 | 19.7 | 39.9 |      |

|     |          |      |      |      |
|-----|----------|------|------|------|
| 404 | ST029993 | 37.5 | 53.7 |      |
| 405 | ST030091 | 29.7 | 31.7 |      |
| 406 | ST030149 | 34.9 | 36.3 |      |
| 407 | ST030406 | 50.1 | 48.8 |      |
| 408 | ST030492 | 64.5 | 76.5 |      |
| 409 | ST030518 | 71.7 | 23.8 |      |
| 410 | ST030589 | 7.9  | 13.6 |      |
| 411 | ST030874 | 34.2 | 52.5 |      |
| 412 | ST030885 | 1.9  | 24.4 |      |
| 413 | ST031151 |      |      |      |
| 414 | ST031276 | 28.5 | 38.6 |      |
| 415 | ST031278 | 39.1 | 7.3  |      |
| 416 | ST031283 | 25.2 | 57.9 |      |
| 417 | ST031410 | 43.9 | 0.7  |      |
| 418 | ST031841 | 22.3 |      |      |
| 419 | ST031858 | 26.9 | 32.3 |      |
| 420 | ST032067 | 96.0 | 94.6 | 98.7 |
| 421 | ST032140 | 12.9 | 42.1 |      |
| 422 | ST032169 | 47.5 | 7.0  |      |
| 423 | ST032199 | 52.6 | 25.6 |      |
| 424 | ST032221 | 66.3 | 51.3 |      |
| 425 | ST032227 | 15.4 | 31.9 |      |
| 426 | ST032388 | 11.5 | 18.9 |      |
| 427 | ST032423 | 0.1  | 27.4 | 43.8 |
| 428 | ST032483 | 9.8  | 30.2 |      |
| 429 | ST032713 | 19.2 | 27.4 |      |
| 430 | ST032792 | 56.0 | 31.4 |      |
| 431 | ST033105 | 88.9 | 85.4 |      |
| 432 | ST033161 | 41.9 | 49.2 |      |
| 433 | ST033261 | 18.1 | 19.6 |      |
| 434 | ST033513 | 22.2 |      |      |
| 435 | ST033568 | 1.0  | 2.6  |      |
| 436 | ST033644 | 40.8 | 36.7 |      |
| 437 | ST033653 | 6.1  | 20.2 |      |
| 438 | ST034022 | 21.7 | 60.7 |      |
| 439 | ST034078 | 36.0 | 26.4 |      |
| 440 | ST034244 | 59.7 | 61.3 |      |
| 441 | ST034338 | 34.7 | 27.1 |      |
| 442 | ST034726 |      |      |      |
| 443 | ST034727 | 15.3 | 19.4 |      |
| 444 | ST034730 | 17.6 | 29.6 | 52.7 |
| 445 | ST034732 |      |      |      |
| 446 | ST034733 | 18.7 | 14.9 |      |
| 447 | ST034735 |      | 27.4 |      |
| 448 | ST035320 | 83.4 | 51.5 |      |
| 449 | ST035419 | 29.2 | 37.9 |      |
| 450 | ST035454 | 9.8  | 33.5 |      |
| 451 | ST035473 | 12.6 | 14.9 |      |
| 452 | ST035612 | 74.2 | 56.7 |      |
| 453 | ST035691 | 46.0 | 37.8 |      |
| 454 | ST035963 | 31.9 | 65.0 |      |

|     |          |      |      |      |      |
|-----|----------|------|------|------|------|
| 455 | ST036586 | 35.1 | 22.4 |      |      |
| 456 | ST036601 | 56.4 | 43.3 |      |      |
| 457 | ST036717 | 24.5 | 28.2 |      |      |
| 458 | ST037127 | 8.6  |      |      |      |
| 459 | ST037249 | 10.5 |      |      |      |
| 460 | ST037252 | 2.9  | 23.2 |      |      |
| 461 | ST037435 | 18.4 | 43.6 |      |      |
| 462 | ST037589 | 12.5 | 7.2  |      |      |
| 463 | ST037628 | 17.9 | 77.6 | 58.3 |      |
| 464 | ST037716 | 46.7 | 28.0 |      |      |
| 465 | ST037730 | 20.5 |      |      |      |
| 466 | ST037733 | 8.9  |      |      |      |
| 467 | ST037793 | 18.2 | 12.0 |      |      |
| 468 | ST037807 | 29.4 | 78.8 | 50.6 |      |
| 469 | ST038122 | 18.5 | 41.1 |      |      |
| 470 | ST038325 | 91.5 | 52.3 |      |      |
| 471 | ST038459 | 27.0 | 40.8 | 50.6 |      |
| 472 | ST038469 | 55.3 | 60.1 |      |      |
| 473 | ST038535 |      |      |      |      |
| 474 | ST038608 |      | 3.6  |      |      |
| 475 | ST038639 |      |      |      |      |
| 476 | ST038647 |      | 18.9 | 44.2 |      |
| 477 | ST038694 |      | 12.3 | 47.8 |      |
| 478 | ST038696 |      | 50.8 |      |      |
| 479 | ST038702 |      | 25.7 |      | 47.0 |
| 480 | ST038741 |      | 8.4  |      |      |
| 481 | ST038762 | 27.2 | 31.6 |      |      |
| 482 | ST038805 | 10.0 | 24.8 |      |      |
| 483 | ST038806 |      |      |      |      |
| 484 | ST038808 | 5.3  |      |      |      |
| 485 | ST038809 | 31.8 | 40.0 |      |      |
| 486 | ST038810 | 10.7 | 3.0  |      |      |
| 487 | ST038811 | 12.3 | 36.8 |      |      |
| 488 | ST038812 | 34.4 | 78.1 |      |      |
| 489 | ST038877 | 3.6  |      |      |      |
| 490 | ST038990 | 28.7 |      |      |      |
| 491 | ST039046 | 52.6 | 14.5 |      |      |
| 492 | ST039051 |      |      |      |      |
| 493 | ST039101 | 60.6 | 82.8 |      |      |
| 494 | ST039113 | 1.1  |      |      |      |
| 495 | ST039129 | 0.0  |      |      |      |
| 496 | ST039132 |      |      |      |      |
| 497 | ST039147 |      | 52.0 |      |      |
| 498 | ST039158 |      | 52.0 |      |      |
| 499 | ST039199 |      | 4.3  |      |      |
| 500 | ST039282 |      | 8.0  |      |      |
| 501 | ST039367 |      | 26.5 |      |      |
| 502 | ST039370 |      | 1.7  |      |      |
| 503 | ST039371 |      | 31.1 |      |      |
| 504 | ST039378 |      | 50.2 |      |      |
| 505 | ST039414 |      | 5.1  |      |      |

---

|     |          |      |      |
|-----|----------|------|------|
| 506 | ST039480 |      | 4.6  |
| 507 | ST039608 |      | 25.2 |
| 508 | ST039659 |      | 10.9 |
| 509 | ST039857 | 34.0 | 50.5 |
| 510 | ST039880 | 1.3  | 18.0 |
| 511 | ST039913 |      | 10.8 |
| 512 | ST040023 | 13.2 | 46.0 |
| 513 | ST040110 |      | 6.9  |
| 514 | ST040237 | 15.6 | 24.1 |
| 515 | ST040658 |      | 12.0 |
| 516 | ST040664 | 8.3  | 9.0  |
| 517 | ST040822 |      | 17.0 |
| 518 | ST040829 |      | 22.1 |
| 519 | ST040847 |      | 40.2 |
| 520 | ST041015 | 69.1 | 94.9 |
| 521 | ST041612 |      |      |
| 522 | ST041789 | 10.8 | 18.2 |
| 523 | ST041792 |      | 34.6 |
| 524 | ST041796 | 45.0 | 55.0 |
| 525 | ST041880 |      | 41.6 |
| 526 | ST041929 |      | 31.0 |
| 527 | ST041930 |      | 36.4 |
| 528 | ST041931 |      |      |
| 529 | ST042040 |      |      |
| 530 | ST042161 | 46.7 |      |
| 531 | ST092788 | 24.4 |      |
| 532 | ST042165 | 43.8 | 52.3 |
| 533 | ST042372 |      |      |
| 534 | ST042674 | 12.7 |      |
| 535 | ST042763 |      | 0.8  |
| 536 | ST042848 | 14.5 | 47.9 |
| 537 | ST042942 |      |      |
| 538 | ST042960 |      |      |
| 539 | ST042961 |      |      |
| 540 | ST042962 |      |      |
| 541 | ST042968 |      |      |
| 542 | ST042970 |      |      |
| 543 | ST042976 |      |      |
| 544 | ST042983 |      | 0.1  |
| 545 | ST043059 |      | 36.1 |
| 546 | ST043061 | 8.2  |      |
| 547 | ST043078 |      |      |
| 548 | ST043135 | 18.2 | 12.3 |
| 549 | ST043173 |      | 21.8 |
| 550 | ST043180 | 16.7 | 13.2 |
| 551 | ST043224 | 78.8 | 91.7 |
| 552 | ST043226 | 11.4 | 33.2 |
| 553 | ST043227 |      | 13.7 |
| 554 | ST043243 | 38.9 | 83.3 |
| 555 | ST043247 | 7.9  |      |
| 556 | ST043268 | 7.6  |      |

---

|     |          |      |      |
|-----|----------|------|------|
| 557 | ST043269 | 10.1 | 32.4 |
| 558 | ST043353 |      | 6.4  |
| 559 | ST043392 | 20.5 | 41.4 |
| 560 | ST043420 | 55.7 | 30.2 |
| 561 | ST043440 | 8.0  | 4.2  |
| 562 | ST043487 |      |      |
| 563 | ST044056 | 62.1 | 21.1 |
| 564 | ST044494 | 7.7  | 23.8 |
| 565 | ST044551 |      | 9.2  |
| 566 | ST044552 |      | 14.1 |
| 567 | ST044561 |      | 17.6 |
| 568 | ST044630 | 0.5  | 56.1 |
| 569 | ST044974 | 38.7 | 54.1 |
| 570 | ST045060 | 3.2  |      |
| 571 | ST045065 | 26.1 | 0.6  |
| 572 | ST045273 | 26.0 | 55.3 |
| 573 | ST045276 | 29.6 | 13.5 |
| 574 | ST045374 | 20.3 | 5.8  |
| 575 | ST045414 | 94.1 | 94.3 |
| 576 | ST045488 | 45.1 |      |
| 577 | ST045538 | 24.1 |      |
| 578 | ST045600 | 25.0 | 4.7  |
| 579 | ST045687 | 56.2 | 33.7 |
| 580 | ST046338 | 32.8 | 30.8 |
| 581 | ST046798 | 44.6 | 23.0 |
| 582 | ST046829 | 98.2 | 57.0 |
| 583 | ST047749 |      | 0.9  |
| 584 | ST047874 |      |      |
| 585 | ST048135 |      |      |
| 586 | ST048140 | 61.3 | 35.2 |
| 587 | ST048234 | 68.0 |      |
| 588 | ST048250 |      | 22.2 |
| 589 | ST048369 | 8.6  | 2.9  |
| 590 | ST048386 |      |      |
| 591 | ST048658 | 26.3 |      |
| 592 | ST048901 | 19.4 | 1.9  |
| 593 | ST049008 |      |      |
| 594 | ST049022 | 94.1 | 57.2 |
| 595 | ST049045 | 54.8 |      |
| 596 | ST049081 | 57.7 | 44.1 |
| 597 | ST049112 | 22.5 |      |
| 598 | ST049114 | 49.4 |      |
| 599 | ST049115 | 47.7 | 29.7 |
| 600 | ST049116 |      |      |
| 601 | ST049173 |      |      |
| 602 | ST049221 | 37.2 | 9.4  |
| 603 | ST049249 |      |      |
| 604 | ST049489 | 78.4 | 72.0 |
| 605 | ST049552 | 10.4 | 19.5 |
| 606 | ST049566 | 40.9 |      |
| 607 | ST049567 | 12.7 |      |

|     |          |      |       |      |
|-----|----------|------|-------|------|
| 608 | ST049753 | 40.5 |       |      |
| 609 | ST049800 | 22.3 |       |      |
| 610 | ST049813 |      | 9.0   |      |
| 611 | ST049846 | 51.9 | 51.8  |      |
| 612 | ST049936 | 92.5 | 100.2 | 68.8 |
| 613 | ST050032 | 12.8 | 2.4   |      |
| 614 | ST050052 |      |       |      |
| 615 | ST050054 | 30.3 | 1.2   |      |
| 616 | ST050055 | 29.3 | 6.8   |      |
| 617 | ST050098 | 20.3 |       |      |
| 618 | ST050100 |      | 21.8  |      |
| 619 | ST050106 | 1.7  |       |      |
| 620 | ST050115 | 15.1 | 11.7  |      |
| 621 | ST050140 | 59.1 | 8.3   |      |
| 622 | ST050151 | 44.4 |       |      |
| 623 | ST050180 | 24.2 |       |      |
| 624 | ST050633 | 46.3 |       |      |
| 625 | ST050731 | 28.3 | 12.6  |      |
| 626 | ST050780 | 23.6 | 31.9  |      |
| 627 | ST051184 | 44.0 |       |      |
| 628 | ST051247 | 67.5 | 51.4  |      |
| 629 | ST051349 | 66.4 | 44.0  |      |
| 630 | ST051365 | 33.4 | 2.4   |      |
| 631 | ST051369 |      |       |      |
| 632 | ST051546 | 12.2 | 18.9  |      |
| 633 | ST051579 | 25.3 |       |      |
| 634 | ST051582 | 13.4 |       |      |
| 635 | ST051585 | 20.0 |       |      |
| 636 | ST051671 | 73.9 |       |      |
| 637 | ST051889 | 34.5 |       |      |
| 638 | ST052109 |      |       |      |
| 639 | ST052110 | 29.6 | 12.6  |      |
| 640 | ST052113 |      |       | 44.8 |
| 641 | ST052116 | 27.5 | 4.9   |      |
| 642 | ST052119 | 17.6 |       |      |
| 643 | ST052159 | 93.6 | 37.1  |      |
| 644 | ST052168 | 15.4 |       |      |
| 645 | ST052217 | 14.6 |       |      |
| 646 | ST052224 | 33.1 |       |      |
| 647 | ST052275 | 11.3 |       |      |
| 648 | ST052326 | 29.1 |       |      |
| 649 | ST052329 |      | 5.6   |      |
| 650 | ST052428 |      | 9.4   |      |
| 651 | ST052456 | 10.4 |       |      |
| 652 | ST052463 | 25.4 | 15.9  |      |
| 653 | ST052468 | 43.4 | 25.8  | 46.8 |
| 654 | ST052473 |      | 35.7  |      |
| 655 | ST052479 | 30.6 |       |      |
| 656 | ST052484 | 34.2 |       |      |
| 657 | ST052490 | 15.3 |       |      |
| 658 | ST052503 | 1.4  |       |      |



|     |          |      |      |      |      |
|-----|----------|------|------|------|------|
| 659 | ST052550 | 9.3  | 27.6 |      |      |
| 660 | ST052552 | 6.5  | 7.0  |      |      |
| 661 | ST052560 | 20.2 |      | 56.7 |      |
| 662 | ST052561 | 0.0  | 9.1  |      |      |
| 663 | ST052562 | 40.2 |      |      |      |
| 664 | ST052637 | 19.5 |      |      |      |
| 665 | ST052638 | 4.4  |      | 43.9 | 65.8 |
| 666 | ST052704 | 9.6  | 6.1  |      |      |
| 667 | ST052802 |      |      |      |      |
| 668 | ST052818 |      |      |      |      |
| 669 | ST052856 | 32.9 |      |      |      |
| 670 | ST052954 | 84.8 | 81.7 |      |      |
| 671 | ST053197 |      |      |      |      |
| 672 | ST053431 | 4.6  |      |      |      |
| 673 | ST053448 | 38.8 |      |      |      |
| 674 | ST053494 | 44.4 | 22.8 |      |      |
| 675 | ST053662 | 4.8  |      |      |      |
| 676 | ST053741 | 65.1 | 37.0 |      |      |
| 677 | ST054184 | 66.8 |      |      |      |
| 678 | ST054368 | 76.3 | 85.7 |      |      |
| 679 | ST054396 | 43.4 | 6.2  |      |      |
| 680 | ST054410 | 24.8 | 50.2 |      | 50.2 |
| 681 | ST054415 |      |      |      |      |
| 682 | ST054547 |      |      |      |      |
| 683 | ST054635 | 0.3  | 3.5  |      | 52.9 |
| 684 | ST054863 | 50.0 | 48.0 |      |      |
| 685 | ST054930 |      | 25.4 |      |      |
| 686 | ST054946 |      |      |      |      |
| 687 | ST055064 |      |      |      |      |
| 688 | ST055065 | 57.8 | 34.1 |      |      |
| 689 | ST055066 |      |      |      |      |
| 690 | ST055114 |      |      |      |      |
| 691 | ST055252 | 98.4 | 95.5 | 70.9 | 99.6 |
| 692 | ST055268 |      |      |      | 50.7 |
| 693 | ST055353 | 2.4  | 9.4  |      |      |
| 694 | ST055419 |      |      |      | 50.6 |
| 695 | ST055620 | 7.2  |      |      |      |
| 696 | ST055621 |      |      |      |      |
| 697 | ST055622 |      |      |      |      |
| 698 | ST055628 |      |      |      |      |
| 699 | ST055632 |      |      |      |      |
| 700 | ST055648 | 6.5  | 18.5 |      |      |
| 701 | ST055809 | 24.4 | 25.7 |      |      |
| 702 | ST055810 | 52.5 | 3.3  |      |      |
| 703 | ST055811 |      |      |      |      |
| 704 | ST055817 | 46.0 | 10.4 |      |      |
| 705 | ST055840 | 25.5 |      |      |      |
| 706 | ST055853 | 18.7 |      |      |      |
| 707 | ST055881 | 8.9  | 36.5 |      |      |
| 708 | ST055882 | 8.4  | 20.6 |      |      |
| 709 | ST055886 | 28.9 | 2.8  |      |      |

|     |          |      |      |      |      |
|-----|----------|------|------|------|------|
| 710 | ST055903 | 4.8  |      |      |      |
| 711 | ST055909 | 53.3 | 36.6 |      |      |
| 712 | ST055915 |      | 94.3 |      |      |
| 713 | ST055924 |      |      |      |      |
| 714 | ST056109 | 82.7 | 76.1 |      |      |
| 715 | ST056192 | 56.0 | 45.2 |      |      |
| 716 | ST056202 |      |      |      |      |
| 717 | ST056228 |      |      |      |      |
| 718 | ST056230 |      |      |      |      |
| 719 | ST056231 | 51.1 | 61.0 |      |      |
| 720 | ST056232 | 47.3 | 20.3 |      |      |
| 721 | ST056236 | 13.3 | 11.9 |      |      |
| 722 | ST056237 | 9.8  | 16.0 |      |      |
| 723 | ST056238 | 54.3 | 96.8 |      |      |
| 724 | ST056239 | 51.7 | 88.4 |      |      |
| 725 | ST056240 |      | 26.1 |      |      |
| 726 | ST056241 |      | 23.2 |      |      |
| 727 | ST056242 | 73.0 | 72.0 |      |      |
| 728 | ST056243 | 74.4 | 59.2 |      |      |
| 729 | ST056244 | 53.8 | 75.1 |      |      |
| 730 | ST056245 |      | 0.0  |      |      |
| 731 | ST056362 | 17.7 | 32.0 |      |      |
| 732 | ST056387 |      |      |      |      |
| 733 | ST056516 |      | 5.9  |      |      |
| 734 | ST056547 |      | 31.6 |      |      |
| 735 | ST056689 |      | 6.1  |      |      |
| 736 | ST056692 |      | 30.5 |      |      |
| 737 | ST056740 |      |      |      |      |
| 738 | ST056759 | 12.1 | 22.6 |      |      |
| 739 | ST056764 |      | 38.3 |      |      |
| 740 | ST056913 |      | 11.4 |      |      |
| 741 | ST056918 | 96.4 | 95.1 | 97.5 |      |
| 742 | ST057032 | 42.8 | 68.3 |      |      |
| 743 | ST057039 | 33.1 | 47.0 |      |      |
| 744 | ST057042 | 87.0 | 94.6 |      |      |
| 745 | ST057231 | 11.2 | 7.2  |      |      |
| 746 | ST057245 |      |      |      |      |
| 747 | ST057254 | 18.8 |      |      |      |
| 748 | ST057334 |      | 17.4 |      |      |
| 749 | ST057344 | 89.1 | 72.6 |      |      |
| 750 | ST057345 | 78.8 | 44.5 |      |      |
| 751 | ST057361 |      |      |      |      |
| 752 | ST057448 | 52.4 | 44.8 |      |      |
| 753 | ST057513 | 30.8 | 38.9 |      |      |
| 754 | ST057514 | 45.7 | 74.1 |      |      |
| 755 | ST057538 | 97.8 | 96.8 | 98.0 | 98.8 |
| 756 | ST057564 | 9.2  |      |      |      |
| 757 | ST057567 | 33.9 | 18.4 |      |      |
| 758 | ST057591 | 2.3  | 16.3 |      |      |
| 759 | ST057628 | 22.6 | 16.7 |      |      |
| 760 | ST057631 | 12.5 | 35.4 |      |      |

|     |          |       |      |      |      |
|-----|----------|-------|------|------|------|
| 761 | ST057632 | 95.7  | 95.4 | 97.7 | 98.4 |
| 762 | ST057725 |       |      |      |      |
| 763 | ST057731 | 64.9  |      |      |      |
| 764 | ST057804 |       | 44.0 |      |      |
| 765 | ST057890 |       | 31.5 |      |      |
| 766 | ST058035 | 7.4   | 55.4 |      |      |
| 767 | ST058036 | 8.7   | 32.1 |      |      |
| 768 | ST058064 |       | 15.6 |      |      |
| 769 | ST058074 | 23.4  | 18.5 |      | 43.3 |
| 770 | ST058101 |       | 7.1  |      |      |
| 771 | ST058126 | 66.3  | 17.5 |      |      |
| 772 | ST058289 |       | 2.0  |      |      |
| 773 | ST058403 |       | 13.4 |      |      |
| 774 | ST058410 | 29.3  |      |      |      |
| 775 | ST058411 |       | 44.8 |      |      |
| 776 | ST058418 |       |      |      |      |
| 777 | ST058420 |       | 13.6 |      |      |
| 778 | ST058433 |       |      |      |      |
| 779 | ST058439 | 4.9   | 14.5 |      |      |
| 780 | ST058444 |       |      |      |      |
| 781 | ST058452 | 59.8  |      |      |      |
| 782 | ST058664 | 34.7  | 32.9 |      |      |
| 783 | ST058680 |       | 30.2 |      |      |
| 784 | ST058803 |       | 35.8 |      |      |
| 785 | ST058867 |       |      |      |      |
| 786 | ST058908 | 76.3  |      |      |      |
| 787 | ST058909 | 30.5  | 38.0 |      |      |
| 788 | ST059035 |       |      |      |      |
| 789 | ST059073 | 100.0 | 93.6 | 96.9 | 97.9 |
| 790 | ST059081 |       | 24.1 |      |      |
| 791 | ST059353 |       | 24.3 |      |      |
| 792 | ST059361 | 80.6  | 45.8 |      |      |
| 793 | ST059419 | 7.7   | 32.2 |      |      |
| 794 | ST059434 | 52.6  |      |      |      |
| 795 | ST059648 |       | 1.5  |      |      |
| 796 | ST059828 |       | 64.3 |      |      |
| 797 | ST060103 | 31.4  | 45.2 |      |      |
| 798 | ST060140 |       | 3.7  |      |      |
| 799 | ST060145 | 2.8   | 15.7 |      |      |
| 800 | ST060182 | 48.3  |      |      |      |
| 801 | ST060191 | 82.5  | 43.8 |      |      |
| 802 | ST060193 | 88.0  | 20.2 |      |      |
| 803 | ST060199 | 63.1  |      |      |      |
| 804 | ST060234 | 57.2  | 26.5 | 42.4 |      |
| 805 | ST060287 | 89.5  | 46.7 |      |      |
| 806 | ST060362 | 47.0  |      | 55.0 |      |
| 807 | ST060391 | 56.2  |      |      |      |
| 808 | ST060472 | 78.9  | 37.9 |      |      |
| 809 | ST060804 | 91.3  | 87.0 |      |      |
| 810 | ST060885 | 33.5  | 30.5 |      |      |
| 811 | ST061746 | 35.8  |      |      |      |

|     |          |      |      |      |      |
|-----|----------|------|------|------|------|
| 812 | ST062376 | 56.0 | 57.5 |      |      |
| 813 | ST063372 | 45.1 |      |      |      |
| 814 | ST063382 | 52.9 |      | 40.1 |      |
| 815 | ST064519 | 62.6 |      | 42.9 |      |
| 816 | ST064520 | 64.3 | 60.4 |      |      |
| 817 | ST064560 | 52.9 |      |      | 56.9 |
| 818 | ST064561 | 61.2 | 51.4 |      |      |
| 819 | ST064725 | 58.9 | 20.1 |      |      |
| 820 | ST064726 | 62.3 | 19.1 |      |      |
| 821 | ST065321 | 70.8 | 16.5 |      |      |
| 822 | ST065331 | 80.2 |      |      |      |
| 823 | ST065341 | 75.8 | 28.2 |      |      |
| 824 | ST065355 | 78.6 | 16.2 |      |      |
| 825 | ST065402 | 75.7 |      | 64.7 | 51.4 |
| 826 | ST065403 | 65.1 |      |      |      |
| 827 | ST065418 | 66.8 | 21.5 |      |      |
| 828 | ST065428 | 64.5 | 61.3 | 62.1 |      |
| 829 | ST065431 | 99.0 | 62.8 |      |      |
| 830 | ST065439 | 63.0 |      | 59.2 |      |
| 831 | ST065455 | 65.9 |      | 45.2 |      |
| 832 | ST065460 | 69.9 | 47.5 |      |      |
| 833 | ST065467 | 16.5 | 56.6 | 62.5 | 48.4 |
| 834 | ST065501 | 42.4 | 19.0 | 66.0 | 45.4 |
| 835 | ST065512 | 34.4 | 57.1 |      |      |
| 836 | ST065528 | 1.6  |      | 60.4 | 48.5 |
| 837 | ST065529 | 49.4 | 27.8 | 63.6 | 57.4 |
| 838 | ST065554 |      |      | 57.9 |      |
| 839 | ST065680 | 14.0 | 37.0 | 44.7 |      |
| 840 | ST065757 |      | 57.2 | 69.2 | 59.6 |
| 841 | ST065785 | 38.7 |      | 47.8 |      |
| 842 | ST065792 | 45.9 |      |      |      |
| 843 | ST065826 | 50.6 | 2.6  |      |      |
| 844 | ST065916 | 64.4 | 54.3 | 40.6 |      |
| 845 | ST065924 | 57.7 | 41.7 |      |      |
| 846 | ST065925 | 47.7 | 15.4 | 58.0 |      |
| 847 | ST065983 | 67.7 | 59.0 | 63.5 |      |
| 848 | ST066003 | 89.4 | 2.1  |      |      |
| 849 | ST066157 | 31.3 | 11.3 |      |      |
| 850 | ST066190 | 65.7 |      | 45.8 |      |
| 851 | ST066286 | 56.6 | 34.0 | 55.3 |      |
| 852 | ST066287 | 53.8 | 16.2 | 54.8 |      |
| 853 | ST066288 | 64.0 | 72.7 | 42.1 |      |
| 854 | ST066294 | 49.0 | 60.0 | 65.3 | 47.3 |
| 855 | ST066330 | 81.2 | 37.6 |      |      |
| 856 | ST066400 | 52.9 |      | 58.1 | 54.7 |
| 857 | ST066425 | 62.6 | 10.0 |      |      |
| 858 | ST066440 | 33.3 | 2.5  |      |      |
| 859 | ST066484 | 58.3 | 43.3 |      |      |
| 860 | ST066505 | 72.7 | 28.3 |      |      |
| 861 | ST066506 | 77.4 | 42.4 |      |      |
| 862 | ST066507 | 83.9 | 37.9 |      |      |

|     |          |      |      |      |      |
|-----|----------|------|------|------|------|
| 863 | ST066681 | 77.8 |      |      |      |
| 864 | ST066694 | 76.6 | 30.6 | 44.8 |      |
| 865 | ST066815 | 73.9 | 36.6 |      |      |
| 866 | ST066817 | 83.3 | 1.7  |      |      |
| 867 | ST066871 | 39.5 |      |      |      |
| 868 | ST066880 | 59.5 |      |      |      |
| 869 | ST066885 | 66.7 | 48.8 |      |      |
| 870 | ST066892 | 47.8 | 17.0 |      |      |
| 871 | ST066902 | 91.3 | 51.6 |      |      |
| 872 | ST066903 | 76.0 | 35.1 |      |      |
| 873 | ST066940 | 59.7 |      |      | 48.7 |
| 874 | ST066947 | 53.3 |      |      | 74.7 |
| 875 | ST066973 | 93.7 |      |      |      |
| 876 | ST066980 | 46.7 |      |      |      |
| 877 | ST066983 | 91.4 |      |      |      |
| 878 | ST067007 | 85.4 | 25.6 |      |      |
| 879 | ST067113 | 42.7 |      | 87.2 | 47.3 |
| 880 | ST067125 | 99.8 | 95.0 | 99.2 | 99.8 |
| 881 | ST067128 | 88.3 | 10.5 |      |      |
| 882 | ST067619 | 83.2 | 3.6  |      |      |
| 883 | ST067888 | 48.0 |      |      |      |
| 884 | ST067892 | 40.0 |      |      |      |
| 885 | ST068124 | 53.1 | 16.3 |      |      |
| 886 | ST068192 | 81.9 |      |      |      |
| 887 | ST068197 | 77.6 | 83.3 |      |      |
| 888 | ST068345 | 84.2 | 33.0 |      | 52.7 |
| 889 | ST068815 | 75.8 |      |      |      |
| 890 | ST068817 | 55.0 | 79.4 |      |      |
| 891 | ST068828 | 0.0  |      |      | 40.6 |
| 892 | ST068835 | 52.5 |      |      |      |
| 893 | ST068840 | 24.6 |      |      | 42.0 |
| 894 | ST068845 | 18.7 |      | 41.3 | 54.6 |
| 895 | ST068876 | 71.3 | 8.1  |      |      |
| 896 | ST068908 | 45.9 | 9.0  |      | 49.5 |
| 897 | ST068909 | 53.7 | 4.4  |      |      |
| 898 | ST068917 | 85.0 | 47.6 |      |      |
| 899 | ST068919 | 62.0 |      |      |      |
| 900 | ST068988 | 82.8 | 30.6 |      |      |
| 901 | ST069019 | 55.0 |      |      |      |
| 902 | ST069027 | 96.2 | 55.7 |      |      |
| 903 | ST069036 | 48.3 |      |      |      |
| 904 | ST069049 | 63.5 |      |      |      |
| 905 | ST069069 | 29.9 |      |      |      |
| 906 | ST069115 | 52.4 |      |      |      |
| 907 | ST069185 | 82.7 | 31.9 |      |      |
| 908 | ST069189 | 67.0 | 13.4 |      |      |
| 909 | ST069212 | 39.8 |      |      |      |
| 910 | ST069229 | 33.0 |      |      |      |
| 911 | ST069268 | 86.8 | 28.2 |      |      |
| 912 | ST069283 | 56.1 |      |      |      |
| 913 | ST069285 | 47.5 |      |      |      |

|     |          |       |      |      |
|-----|----------|-------|------|------|
| 914 | ST069292 | 79.4  | 35.9 |      |
| 915 | ST069293 | 100.3 | 46.4 |      |
| 916 | ST069294 | 101.9 | 95.7 |      |
| 917 | ST069356 | 68.8  | 9.1  |      |
| 918 | ST069437 | 57.6  | 21.8 |      |
| 919 | ST069782 | 70.0  | 3.2  |      |
| 920 | ST069813 | 50.1  |      | 44.9 |
| 921 | ST069827 | 25.1  | 9.2  |      |
| 922 | ST069845 | 36.4  | 57.6 |      |
| 923 | ST069851 | 79.6  | 9.7  |      |
| 924 | ST069852 | 35.3  | 4.0  |      |
| 925 | ST069853 | 81.7  | 15.2 |      |
| 926 | ST069862 | 48.3  | 2.1  |      |
| 927 | ST069867 | 65.8  |      | 43.6 |
| 928 | ST069870 | 0.0   |      | 58.4 |
| 929 | ST069874 | 38.7  | 25.4 |      |
| 930 | ST069880 | 9.5   |      |      |
| 931 | ST069882 | 27.7  | 61.5 |      |
| 932 | ST069883 | 62.2  | 7.4  |      |
| 933 | ST069885 | 52.7  |      | 76.5 |
| 934 | ST069891 | 51.0  |      |      |
| 935 | ST069892 | 73.7  |      | 51.8 |
| 936 | ST069895 | 63.5  |      | 60.1 |
| 937 | ST069900 | 57.4  | 16.2 |      |
| 938 | ST069904 | 68.1  | 13.1 |      |
| 939 | ST069909 | 60.9  | 29.9 |      |
| 940 | ST069913 | 54.2  | 21.5 |      |
| 941 | ST069914 | 49.0  | 20.4 |      |
| 942 | ST069919 | 24.6  |      |      |
| 943 | ST069920 | 56.4  |      |      |
| 944 | ST069921 | 54.8  |      |      |
| 945 | ST069925 | 29.1  | 7.6  | 47.1 |
| 946 | ST069931 | 88.8  | 20.1 |      |
| 947 | ST069932 | 89.0  | 30.5 |      |
| 948 | ST069933 | 88.5  | 13.2 |      |
| 949 | ST069971 | 79.3  | 6.5  |      |
| 950 | ST069978 | 14.6  |      |      |
| 951 | ST069984 | 77.5  |      |      |
| 952 | ST070003 | 48.8  |      |      |
| 953 | ST070071 | 39.5  | 2.7  |      |
| 954 | ST070081 | 12.5  |      | 44.3 |
| 955 | ST070082 | 0.0   |      |      |
| 956 | ST070083 | 16.8  |      |      |
| 957 | ST070085 | 40.1  |      |      |
| 958 | ST070086 | 37.2  |      |      |
| 959 | ST070111 | 23.7  |      |      |
| 960 | ST070114 | 62.6  |      | 60.7 |
| 961 | ST070116 | 12.6  | 53.5 |      |
| 962 | ST070117 | 68.6  | 3.8  |      |
| 963 | ST070120 | 55.4  | 15.5 |      |
| 964 | ST070122 | 71.7  | 2.8  |      |

|      |          |      |      |      |      |
|------|----------|------|------|------|------|
| 965  | ST070123 | 60.9 | 38.3 |      |      |
| 966  | ST070125 | 32.5 | 24.8 |      |      |
| 967  | ST070136 | 21.9 | 53.9 |      |      |
| 968  | ST070145 | 57.4 | 61.5 |      |      |
| 969  | ST070161 | 77.6 | 24.7 |      |      |
| 970  | ST070174 | 29.8 | 19.1 |      |      |
| 971  | ST070175 | 30.9 | 6.9  |      |      |
| 972  | ST070176 | 22.2 |      |      |      |
| 973  | ST070177 | 14.1 |      | 62.5 | 40.9 |
| 974  | ST070178 | 31.8 |      |      |      |
| 975  | ST070179 | 10.1 | 15.6 |      |      |
| 976  | ST070180 | 49.5 | 40.7 |      |      |
| 977  | ST070181 | 76.5 |      | 50.5 |      |
| 978  | ST070182 | 9.8  |      |      |      |
| 979  | ST070183 | 59.1 | 32.4 |      |      |
| 980  | ST070187 | 71.5 | 16.0 |      |      |
| 981  | ST070188 | 76.2 | 46.3 |      |      |
| 982  | ST070191 | 68.3 | 12.0 |      |      |
| 983  | ST070194 | 49.9 | 28.3 |      |      |
| 984  | ST070196 | 75.3 | 82.8 |      |      |
| 985  | ST070199 | 85.4 | 21.8 |      |      |
| 986  | ST070201 | 83.3 | 11.8 |      |      |
| 987  | ST070203 | 91.0 |      |      |      |
| 988  | ST070204 | 46.1 | 3.7  |      |      |
| 989  | ST070206 | 67.1 | 45.7 |      |      |
| 990  | ST070207 | 87.1 | 23.8 |      |      |
| 991  | ST070208 | 43.1 | 53.7 |      |      |
| 992  | ST070231 | 50.6 | 30.5 |      |      |
| 993  | ST070232 | 81.3 | 4.1  |      |      |
| 994  | ST070239 | 32.6 |      |      |      |
| 995  | ST070242 | 69.8 |      |      |      |
| 996  | ST070252 | 22.6 |      |      |      |
| 997  | ST070262 | 54.7 |      |      |      |
| 998  | ST070268 | 93.3 | 48.6 |      |      |
| 999  | ST070269 | 79.4 | 8.0  |      |      |
| 1000 | ST070270 | 51.3 | 39.8 |      |      |
| 1001 | ST070271 | 69.4 | 19.1 |      |      |
| 1002 | ST070272 | 72.4 | 5.8  |      |      |
| 1003 | ST070273 | 57.6 |      |      |      |
| 1004 | ST070277 | 92.6 | 14.9 | 59.4 |      |
| 1005 | ST070281 | 93.7 | 66.5 |      |      |
| 1006 | ST070282 | 94.0 | 18.9 |      |      |
| 1007 | ST070284 | 45.0 | 73.3 | 48.1 |      |
| 1008 | ST070287 | 65.1 | 41.4 |      |      |
| 1009 | ST070290 | 87.8 | 6.9  |      |      |
| 1010 | ST070291 | 69.1 | 0.4  |      |      |
| 1011 | ST070297 | 77.9 | 4.8  |      |      |
| 1012 | ST070330 | 80.7 | 1.0  |      |      |
| 1013 | ST070344 | 67.7 | 38.3 |      |      |
| 1014 | ST070345 | 61.2 |      |      |      |
| 1015 | ST070347 | 55.4 | 48.0 |      |      |

|      |          |      |      |      |      |
|------|----------|------|------|------|------|
| 1016 | ST070387 | 34.1 | 97.5 |      |      |
| 1017 | ST070396 | 20.3 |      |      |      |
| 1018 | ST070408 | 88.2 | 17.1 |      |      |
| 1019 | ST070416 | 77.2 | 11.5 |      |      |
| 1020 | ST070417 | 34.6 |      |      |      |
| 1021 | ST070418 | 41.4 |      |      |      |
| 1022 | ST070419 | 92.2 | 29.9 |      |      |
| 1023 | ST070420 | 84.2 | 34.0 | 42.9 |      |
| 1024 | ST070421 | 61.0 | 33.4 |      |      |
| 1025 | ST070422 | 68.2 |      |      |      |
| 1026 | ST070438 | 88.1 |      | 55.0 |      |
| 1027 | ST070444 | 86.6 |      |      |      |
| 1028 | ST070455 | 87.8 |      |      |      |
| 1029 | ST070456 | 30.3 |      |      |      |
| 1030 | ST070457 | 92.0 | 19.3 | 54.4 |      |
| 1031 | ST070458 | 98.0 | 98.6 | 97.7 | 97.6 |
| 1032 | ST070492 | 71.5 | 95.4 | 53.8 |      |
| 1033 | ST070499 | 55.3 |      |      |      |
| 1034 | ST070506 | 88.8 |      |      | 67.5 |
| 1035 | ST070595 | 87.2 |      |      |      |
| 1036 | ST070604 | 81.5 | 2.0  | 51.1 |      |
| 1037 | ST070609 | 23.9 |      |      |      |
| 1038 | ST070619 | 95.3 | 25.8 | 58.9 |      |
| 1039 | ST070626 | 95.9 | 95.8 | 97.7 | 97.0 |
| 1040 | ST070645 | 45.6 | 95.0 | 72.5 |      |
| 1041 | ST070657 | 72.8 | 66.6 |      |      |
| 1042 | ST070666 | 14.1 | 50.6 |      |      |
| 1043 | ST070667 | 39.8 | 68.5 | 69.8 |      |
| 1044 | ST070691 |      | 14.2 | 73.0 |      |
| 1045 | ST070696 | 6.8  | 74.1 | 59.5 |      |
| 1046 | ST070700 | 21.2 | 11.0 |      |      |
| 1047 | ST070702 | 55.4 | 28.8 |      |      |
| 1048 | ST070712 | 41.5 | 61.6 |      |      |
| 1049 | ST070720 | 28.8 | 38.0 |      |      |
| 1050 | ST070729 | 38.3 | 35.4 |      |      |
| 1051 | ST070736 | 65.4 | 82.0 |      |      |
| 1052 | ST070744 |      | 77.6 |      |      |
| 1053 | ST070750 |      |      |      |      |
| 1054 | ST070761 | 28.5 | 26.9 |      | 49.2 |
| 1055 | ST070805 | 0.9  | 30.5 |      | 96.3 |
| 1056 | ST070814 | 18.0 | 51.6 |      |      |
| 1057 | ST070815 | 43.4 | 53.3 |      |      |
| 1058 | ST070816 |      | 50.8 |      |      |
| 1059 | ST070817 | 47.3 | 52.4 |      |      |
| 1060 | ST070818 | 67.4 | 50.5 |      |      |
| 1061 | ST070819 | 8.5  | 50.8 |      |      |
| 1062 | ST070820 | 59.6 | 49.8 |      |      |
| 1063 | ST070821 | 37.4 | 40.9 |      |      |
| 1064 | ST070825 | 52.9 | 47.8 | 41.2 |      |
| 1065 | ST070828 | 55.7 | 73.8 |      |      |
| 1066 | ST070841 | 34.8 | 71.5 |      |      |



|      |          |      |       |      |      |
|------|----------|------|-------|------|------|
| 1067 | ST070844 |      | 31.0  |      |      |
| 1068 | ST070845 | 64.0 | 98.0  |      |      |
| 1069 | ST070846 | 71.7 | 64.0  |      |      |
| 1070 | ST070847 | 79.5 | 60.8  |      |      |
| 1071 | ST070848 | 84.7 | 61.7  |      |      |
| 1072 | ST070849 | 63.3 | 60.2  |      |      |
| 1073 | ST070850 | 55.2 | 44.2  |      |      |
| 1074 | ST070851 |      | 36.0  |      |      |
| 1075 | ST070859 |      | 73.5  |      |      |
| 1076 | ST070860 |      | 52.6  |      |      |
| 1077 | ST070861 | 56.6 | 65.4  |      |      |
| 1078 | ST070865 | 27.0 | 52.3  |      |      |
| 1079 | ST070866 | 74.9 | 63.2  |      |      |
| 1080 | ST070867 |      |       |      | 70.5 |
| 1081 | ST070869 | 75.2 | 65.7  |      |      |
| 1082 | ST070879 |      | 14.3  |      |      |
| 1083 | ST070911 | 13.7 | 64.2  | 41.3 |      |
| 1084 | ST070934 |      | 17.9  | 65.9 |      |
| 1085 | ST070940 |      | 26.8  | 59.1 |      |
| 1086 | ST070990 | 9.5  | 46.1  |      |      |
| 1087 | ST071048 | 1.3  | 72.5  |      |      |
| 1088 | ST071058 |      |       |      | 63.1 |
| 1089 | ST071081 |      | 36.7  | 57.6 |      |
| 1090 | ST071082 |      | 9.3   |      | 96.6 |
| 1091 | ST071099 | 6.4  | 55.7  |      |      |
| 1092 | ST071102 | 21.1 | 62.0  |      |      |
| 1093 | ST071103 | 23.2 | 76.8  |      |      |
| 1094 | ST071104 |      | 75.8  |      |      |
| 1095 | ST071105 | 19.0 | 79.5  |      | 49.4 |
| 1096 | ST071106 |      | 11.0  |      |      |
| 1097 | ST071107 | 26.9 | 8.8   | 61.8 |      |
| 1098 | ST071108 | 58.5 | 37.2  | 67.1 |      |
| 1099 | ST071109 | 63.4 | 52.0  |      |      |
| 1100 | ST071112 | 21.8 | 31.1  | 50.4 |      |
| 1101 | ST071124 | 22.3 | 85.2  |      |      |
| 1102 | ST071152 |      | 18.2  | 74.3 |      |
| 1103 | ST071169 | 92.7 | 100.1 | 96.5 | 97.3 |
| 1104 | ST071178 | 7.2  | 78.6  | 54.6 |      |
| 1105 | ST071180 | 90.1 | 25.4  | 89.4 | 45.6 |
| 1106 | ST071191 | 11.1 | 44.5  |      |      |
| 1107 | ST071243 | 50.6 | 56.3  |      |      |
| 1108 | ST071246 |      | 5.8   |      |      |
| 1109 | ST071248 |      | 23.4  |      |      |
| 1110 | ST071254 | 9.6  | 42.8  |      |      |
| 1111 | ST071258 | 38.1 | 74.5  |      |      |
| 1112 | ST071283 | 91.3 | 98.9  |      | 98.7 |
| 1113 | ST071307 | 22.6 | 16.6  |      |      |
| 1114 | ST071326 | 39.7 | 42.3  |      |      |
| 1115 | ST071332 | 14.9 | 39.3  |      |      |
| 1116 | ST071368 | 54.6 | 26.2  |      |      |
| 1117 | ST071372 | 74.2 | 68.6  |      |      |

|      |          |      |      |       |      |
|------|----------|------|------|-------|------|
| 1118 | ST071374 | 47.8 | 58.0 |       |      |
| 1119 | ST071376 | 21.7 | 80.3 |       |      |
| 1120 | ST071381 | 13.3 | 73.1 |       |      |
| 1121 | ST071382 | 58.9 |      |       |      |
| 1122 | ST071609 | 71.0 | 79.9 |       |      |
| 1123 | ST071613 | 58.7 |      |       |      |
| 1124 | ST071618 |      |      |       |      |
| 1125 | ST071631 | 62.1 |      |       |      |
| 1126 | ST071652 | 49.3 | 39.1 |       |      |
| 1127 | ST071653 | 20.2 |      | 55.0  |      |
| 1128 | ST071660 | 19.4 |      |       |      |
| 1129 | ST071661 | 77.4 |      |       |      |
| 1130 | ST071662 | 23.6 | 75.8 |       |      |
| 1131 | ST071672 | 29.2 | 16.1 |       |      |
| 1132 | ST071675 | 36.8 |      |       |      |
| 1133 | ST071687 | 3.4  |      | 50.8  |      |
| 1134 | ST071698 |      |      | 64.2  |      |
| 1135 | ST071704 | 9.3  |      |       |      |
| 1136 | ST071705 | 4.1  | 50.1 | 52.2  |      |
| 1137 | ST071761 | 94.8 | 62.7 | 50.1  |      |
| 1138 | ST071764 |      | 24.6 | 51.0  |      |
| 1139 | ST071773 | 46.2 |      |       |      |
| 1140 | ST071804 | 59.5 |      |       |      |
| 1141 | ST071806 | 40.5 |      |       |      |
| 1142 | ST071809 |      | 67.8 | 104.5 |      |
| 1143 | ST071810 |      | 18.0 | 65.3  |      |
| 1144 | ST071811 | 35.3 | 20.1 | 66.4  |      |
| 1145 | ST071812 | 32.2 | 33.3 | 53.6  |      |
| 1146 | ST071813 | 68.2 | 57.9 |       |      |
| 1147 | ST071814 | 34.5 | 34.2 |       |      |
| 1148 | ST071815 | 62.7 | 33.7 |       |      |
| 1149 | ST071816 |      | 54.7 | 66.7  | 62.8 |
| 1150 | ST071817 |      |      | 95.8  |      |
| 1151 | ST071819 | 51.8 | 59.1 |       |      |
| 1152 | ST071823 | 21.5 | 48.3 |       |      |
| 1153 | ST071826 | 72.1 | 67.7 |       |      |
| 1154 | ST071827 |      | 81.1 |       |      |
| 1155 | ST071837 |      |      | 66.1  |      |
| 1156 | ST071838 | 19.6 | 73.8 | 50.5  |      |
| 1157 | ST071842 |      | 14.4 |       |      |
| 1158 | ST071843 | 47.0 |      |       |      |
| 1159 | ST071846 | 62.5 | 81.9 |       |      |
| 1160 | ST071857 | 28.3 | 60.8 |       |      |
| 1161 | ST071861 |      | 36.5 | 52.7  |      |
| 1162 | ST071866 | 80.9 |      |       |      |
| 1163 | ST071868 |      |      | 73.8  | 79.6 |
| 1164 | ST071869 | 57.7 |      |       |      |
| 1165 | ST071872 | 44.3 | 5.2  |       |      |
| 1166 | ST071873 | 1.6  | 30.7 |       |      |
| 1167 | ST071874 |      | 26.2 | 50.3  |      |
| 1168 | ST071934 | 30.1 |      |       |      |

---

|      |          |      |       |      |      |
|------|----------|------|-------|------|------|
| 1169 | ST071936 |      |       |      |      |
| 1170 | ST071942 |      |       |      |      |
| 1171 | ST071943 |      |       |      |      |
| 1172 | ST071963 | 28.1 |       |      |      |
| 1173 | ST071988 |      |       |      |      |
| 1174 | ST072000 | 35.0 | 40.9  |      |      |
| 1175 | ST072028 | 5.1  |       | 50.9 |      |
| 1176 | ST072050 |      |       | 46.7 |      |
| 1177 | ST072062 | 41.3 |       |      |      |
| 1178 | ST072068 | 56.5 |       |      |      |
| 1179 | ST072086 | 15.3 |       |      |      |
| 1180 | ST072087 | 21.4 |       |      |      |
| 1181 | ST072088 | 25.6 | 42.2  |      |      |
| 1182 | ST072120 | 25.1 |       |      |      |
| 1183 | ST072189 | 6.3  |       |      |      |
| 1184 | ST072200 | 94.0 | 87.9  | 99.4 | 98.5 |
| 1185 | ST072213 |      |       |      |      |
| 1186 | ST072236 | 67.7 |       |      |      |
| 1187 | ST072244 | 42.6 | 42.5  |      |      |
| 1188 | ST072245 | 33.1 | 41.2  |      |      |
| 1189 | ST072246 | 66.9 | 9.3   |      |      |
| 1190 | ST072247 |      |       |      |      |
| 1191 | ST072248 | 15.2 |       |      |      |
| 1192 | ST072283 | 62.4 | 58.0  | 59.4 |      |
| 1193 | ST072284 |      |       | 48.0 |      |
| 1194 | ST072285 | 58.0 | 28.5  | 51.8 |      |
| 1195 | ST072286 | 72.4 |       | 49.8 |      |
| 1196 | ST072290 | 55.9 | 70.3  | 50.0 |      |
| 1197 | ST072291 | 14.7 | 47.2  |      |      |
| 1198 | ST072292 | 49.1 | 44.3  | 74.2 |      |
| 1199 | ST072299 |      |       | 71.5 |      |
| 1200 | ST072300 |      |       |      |      |
| 1201 | ST072303 |      | 2.9   |      |      |
| 1202 | ST072305 |      |       |      |      |
| 1203 | ST072306 |      | 15.1  |      |      |
| 1204 | ST072319 | 25.0 | 37.0  |      |      |
| 1205 | ST072320 | 30.5 | 47.9  |      |      |
| 1206 | ST072321 | 31.4 | 41.2  |      |      |
| 1207 | ST072322 |      | 9.9   |      |      |
| 1208 | ST072326 | 3.6  | 65.0  |      |      |
| 1209 | ST072327 |      | 33.1  |      |      |
| 1210 | ST072383 |      | 43.5  |      |      |
| 1211 | ST072385 |      | 41.8  |      |      |
| 1212 | ST072400 |      | 57.5  |      |      |
| 1213 | ST072414 |      | 39.9  |      |      |
| 1214 | ST072415 |      | 103.0 |      |      |
| 1215 | ST072436 |      | 31.1  |      |      |
| 1216 | ST072460 |      | 40.7  |      |      |
| 1217 | ST072533 |      | 28.8  | 40.4 |      |
| 1218 | ST072573 |      | 25.5  | 47.4 |      |
| 1219 | ST072956 |      | 32.4  | 43.8 |      |

|      |          |      |      |      |      |
|------|----------|------|------|------|------|
| 1220 | ST072960 |      | 38.9 |      | 45.0 |
| 1221 | ST072968 |      | 42.5 |      |      |
| 1222 | ST072975 |      | 28.6 |      |      |
| 1223 | ST072980 |      | 68.2 |      |      |
| 1224 | ST072991 |      | 62.8 |      |      |
| 1225 | ST072994 |      | 48.9 |      |      |
| 1226 | ST072995 |      | 41.7 |      |      |
| 1227 | ST073000 |      | 33.3 | 62.3 |      |
| 1228 | ST073011 |      | 35.1 |      |      |
| 1229 | ST073018 |      | 42.3 |      |      |
| 1230 | ST073028 |      | 44.9 |      |      |
| 1231 | ST073050 |      | 51.0 |      |      |
| 1232 | ST073057 |      | 46.7 |      |      |
| 1233 | ST073059 |      |      |      | 43.9 |
| 1234 | ST073066 |      |      |      |      |
| 1235 | ST073073 |      | 6.9  |      |      |
| 1236 | ST073151 |      | 30.2 |      |      |
| 1237 | ST073152 |      | 12.0 |      |      |
| 1238 | ST073153 | 19.8 | 0.9  |      |      |
| 1239 | ST073157 |      |      |      |      |
| 1240 | ST073164 |      | 3.4  |      |      |
| 1241 | ST073165 |      | 24.5 |      |      |
| 1242 | ST073166 |      | 35.1 |      |      |
| 1243 | ST073173 |      | 52.6 |      |      |
| 1244 | ST073174 |      | 29.5 |      |      |
| 1245 | ST073175 |      | 15.9 |      |      |
| 1246 | ST073206 |      | 14.1 |      |      |
| 1247 | ST073219 |      | 29.4 |      |      |
| 1248 | ST073282 |      | 31.3 |      |      |
| 1249 | ST073363 |      | 51.6 | 58.4 |      |
| 1250 | ST073382 |      |      |      |      |
| 1251 | ST073733 |      | 26.2 |      |      |
| 1252 | ST073740 |      | 24.5 |      |      |
| 1253 | ST073741 |      | 31.9 | 43.4 |      |
| 1254 | ST073742 |      | 30.2 | 52.8 |      |
| 1255 | ST073783 |      | 32.9 |      |      |
| 1256 | ST073815 |      | 22.4 | 56.2 |      |
| 1257 | ST073843 |      | 16.4 |      |      |
| 1258 | ST073918 |      | 17.2 |      |      |
| 1259 | ST073946 |      | 31.0 |      |      |
| 1260 | ST073954 |      | 49.4 |      |      |
| 1261 | ST074022 |      | 58.2 | 48.5 | 49.8 |
| 1262 | ST074026 |      | 39.3 |      |      |
| 1263 | ST074031 |      | 37.9 |      | 51.7 |
| 1264 | ST074036 |      |      |      |      |
| 1265 | ST074266 |      | 31.2 |      | 42.7 |
| 1266 | ST074268 |      | 64.3 |      |      |
| 1267 | ST074270 | 40.7 | 72.3 |      |      |
| 1268 | ST074273 |      | 30.1 | 42.4 |      |
| 1269 | ST074282 |      | 48.9 |      | 44.8 |
| 1270 | ST074284 |      | 37.4 |      |      |

|      |          |      |      |      |      |
|------|----------|------|------|------|------|
| 1271 | ST074298 |      | 51.2 | 41.1 |      |
| 1272 | ST074299 | 27.4 |      |      |      |
| 1273 | ST074300 | 51.1 | 62.3 |      | 96.6 |
| 1274 | ST074303 |      |      |      |      |
| 1275 | ST074304 |      | 32.7 |      |      |
| 1276 | ST074305 |      |      |      |      |
| 1277 | ST074306 |      | 16.0 |      |      |
| 1278 | ST074307 |      | 24.6 |      |      |
| 1279 | ST074308 |      | 50.3 |      |      |
| 1280 | ST074309 |      | 57.7 |      |      |
| 1281 | ST074310 |      |      |      |      |
| 1282 | ST074311 | 1.1  |      |      |      |
| 1283 | ST074312 |      |      |      |      |
| 1284 | ST074313 | 24.0 |      |      |      |
| 1285 | ST074314 | 16.7 | 0.5  |      |      |
| 1286 | ST074315 |      |      |      |      |
| 1287 | ST074316 | 13.9 | 37.2 |      |      |
| 1288 | ST074317 |      | 26.3 | 63.1 |      |
| 1289 | ST074318 | 87.5 |      |      |      |
| 1290 | ST074344 |      |      |      |      |
| 1291 | ST074345 |      |      |      |      |
| 1292 | ST074346 |      |      |      |      |
| 1293 | ST074347 |      |      |      |      |
| 1294 | ST074348 |      | 28.3 |      |      |
| 1295 | ST074349 |      | 17.4 |      |      |
| 1296 | ST074350 |      | 36.0 |      |      |
| 1297 | ST074351 | 99.2 |      |      |      |
| 1298 | ST074370 | 1.2  |      |      |      |
| 1299 | ST074375 |      |      |      |      |
| 1300 | ST074376 |      | 31.4 |      |      |
| 1301 | ST074377 | 33.8 | 21.9 |      |      |
| 1302 | ST074378 |      | 4.2  |      |      |
| 1303 | ST074379 |      | 15.4 |      |      |
| 1304 | ST074380 | 6.7  | 44.7 |      |      |
| 1305 | ST074381 |      | 20.7 |      |      |
| 1306 | ST074382 |      | 14.7 |      |      |
| 1307 | ST074383 |      | 51.0 |      |      |
| 1308 | ST074384 | 30.7 | 45.5 |      |      |
| 1309 | ST074385 |      | 40.3 |      |      |
| 1310 | ST074386 | 7.1  | 46.8 |      |      |
| 1311 | ST074387 | 23.8 | 29.1 |      |      |
| 1312 | ST074388 |      | 40.3 |      |      |
| 1313 | ST074390 |      | 30.0 | 56.6 |      |
| 1314 | ST074391 | 39.5 |      | 55.0 |      |
| 1315 | ST074392 |      | 55.9 |      |      |
| 1316 | ST074393 |      | 29.2 |      |      |
| 1317 | ST074394 |      | 36.0 |      |      |
| 1318 | ST074395 |      | 45.9 |      |      |
| 1319 | ST074396 |      | 38.6 |      |      |
| 1320 | ST074397 |      | 39.0 | 51.1 |      |
| 1321 | ST074398 |      | 34.0 |      |      |

|      |          |      |      |       |      |
|------|----------|------|------|-------|------|
| 1322 | ST074399 |      | 38.2 |       |      |
| 1323 | ST074400 |      | 26.9 |       |      |
| 1324 | ST074401 |      | 35.9 |       |      |
| 1325 | ST074402 |      | 38.1 |       |      |
| 1326 | ST074403 |      | 28.4 |       |      |
| 1327 | ST074404 |      | 39.1 |       |      |
| 1328 | ST074405 |      | 62.7 |       |      |
| 1329 | ST074406 |      | 17.2 |       |      |
| 1330 | ST074408 | 23.9 | 52.8 |       |      |
| 1331 | ST074412 | 50.2 | 47.4 | 44.9  | 50.2 |
| 1332 | ST074429 |      | 49.3 |       |      |
| 1333 | ST074438 |      | 53.7 |       |      |
| 1334 | ST074446 |      | 47.5 |       |      |
| 1335 | ST074454 |      | 35.0 |       |      |
| 1336 | ST074455 |      | 57.4 |       |      |
| 1337 | ST074456 |      | 36.1 |       |      |
| 1338 | ST074466 | 19.6 | 70.8 |       |      |
| 1339 | ST074488 |      | 56.6 |       |      |
| 1340 | ST074489 |      | 51.4 |       |      |
| 1341 | ST074502 |      |      | 48.5  |      |
| 1342 | ST074508 |      | 61.5 |       |      |
| 1343 | ST074515 |      | 53.3 |       |      |
| 1344 | ST074520 | 29.4 | 50.9 | 114.8 |      |
| 1345 | ST074526 |      | 71.5 |       |      |
| 1346 | ST074527 |      | 36.1 |       |      |
| 1347 | ST074528 |      | 49.7 |       |      |
| 1348 | ST074532 |      | 44.6 |       |      |
| 1349 | ST074545 |      | 46.2 |       |      |
| 1350 | ST074554 |      |      | 57.8  |      |
| 1351 | ST074557 |      | 26.6 |       |      |
| 1352 | ST074558 | 18.8 | 99.6 |       |      |
| 1353 | ST074559 |      | 35.8 |       |      |
| 1354 | ST074660 |      | 1.5  |       |      |
| 1355 | ST074701 |      | 14.1 |       |      |
| 1356 | ST074702 |      | 36.5 |       |      |
| 1357 | ST074705 |      | 47.6 |       |      |
| 1358 | ST074706 |      | 34.9 |       |      |
| 1359 | ST074707 | 20.7 | 32.9 | 42.4  |      |
| 1360 | ST074708 |      | 39.7 | 54.4  |      |
| 1361 | ST074709 | 25.2 | 20.7 | 60.2  |      |
| 1362 | ST074710 |      | 24.1 |       |      |
| 1363 | ST074711 |      | 58.1 |       |      |
| 1364 | ST074712 | 18.3 | 48.1 | 70.3  | 54.6 |
| 1365 | ST074713 | 6.4  | 29.2 | 71.6  |      |
| 1366 | ST074714 | 72.4 | 12.6 | 49.4  |      |
| 1367 | ST074715 | 87.9 | 56.1 |       |      |
| 1368 | ST074716 | 24.3 | 60.8 | 44.2  |      |
| 1369 | ST074717 | 25.9 | 26.8 | 65.4  | 46.1 |
| 1370 | ST074718 |      | 33.9 |       |      |
| 1371 | ST074719 |      | 54.4 |       |      |
| 1372 | ST074720 | 27.7 | 57.9 |       |      |

|      |          |      |      |      |      |
|------|----------|------|------|------|------|
| 1373 | ST074721 | 53.2 | 39.8 |      |      |
| 1374 | ST074722 | 55.0 | 47.2 |      |      |
| 1375 | ST074723 | 31.0 | 63.7 |      |      |
| 1376 | ST074724 | 31.5 | 62.4 |      |      |
| 1377 | ST074725 | 42.9 | 63.2 |      |      |
| 1378 | ST074726 | 6.3  | 22.5 | 56.5 | 75.6 |
| 1379 | ST074727 | 68.5 | 22.8 | 41.3 | 53.3 |
| 1380 | ST074728 | 35.5 |      |      | 56.8 |
| 1381 | ST074729 | 53.8 | 1.5  |      |      |
| 1382 | ST074730 | 44.9 | 39.4 |      |      |
| 1383 | ST074731 | 21.5 | 23.0 |      |      |
| 1384 | ST074732 | 87.7 | 91.9 |      |      |
| 1385 | ST074733 | 72.7 | 92.8 |      |      |
| 1386 | ST074734 | 38.2 | 81.3 |      |      |
| 1387 | ST074735 |      | 26.7 |      | 45.2 |
| 1388 | ST074736 | 30.6 |      |      |      |
| 1389 | ST074737 | 35.9 | 27.1 |      |      |
| 1390 | ST074738 | 36.9 | 48.7 |      |      |
| 1391 | ST074739 | 29.0 | 59.2 |      |      |
| 1392 | ST074740 | 48.6 | 55.4 |      |      |
| 1393 | ST074741 |      | 53.5 |      |      |
| 1394 | ST074742 | 31.7 | 54.6 |      | 40.3 |
| 1395 | ST074743 | 53.8 | 39.1 |      |      |
| 1396 | ST074744 |      | 27.9 |      | 70.3 |
| 1397 | ST074745 |      | 89.2 |      | 52.7 |
| 1398 | ST074746 | 35.8 | 48.0 |      |      |
| 1399 | ST074747 | 38.1 | 26.8 |      |      |
| 1400 | ST074748 | 64.3 | 16.3 |      |      |
| 1401 | ST074749 | 67.7 | 34.5 |      |      |
| 1402 | ST074750 | 30.0 | 2.3  |      | 59.3 |
| 1403 | ST074751 | 80.1 | 28.0 |      | 70.9 |
| 1404 | ST074752 | 17.1 | 26.5 |      | 55.4 |
| 1405 | ST074753 | 77.0 | 3.5  |      |      |
| 1406 | ST074754 | 40.0 | 93.3 |      |      |
| 1407 | ST074755 | 40.1 |      |      |      |
| 1408 | ST074756 | 2.6  | 16.6 |      |      |
| 1409 | ST074757 | 62.3 | 27.2 |      |      |
| 1410 | ST074758 | 23.1 | 21.7 | 49.0 | 62.2 |
| 1411 | ST074759 | 48.3 | 30.6 |      |      |
| 1412 | ST074760 | 25.0 |      | 51.6 | 65.4 |
| 1413 | ST074761 | 36.5 | 10.7 |      |      |
| 1414 | ST074762 | 33.0 | 21.8 |      |      |
| 1415 | ST074763 | 39.3 | 61.8 |      |      |
| 1416 | ST074764 | 63.8 | 59.0 |      |      |
| 1417 | ST074765 | 42.9 | 27.7 | 55.7 |      |
| 1418 | ST074766 | 70.9 |      |      |      |
| 1419 | ST074767 | 61.4 | 38.5 | 59.9 | 42.0 |
| 1420 | ST074768 | 30.5 | 25.1 |      |      |
| 1421 | ST074769 | 53.2 | 55.0 | 53.3 |      |
| 1422 | ST074770 | 33.9 | 0.0  |      |      |
| 1423 | ST074771 | 27.4 |      |      |      |

|      |          |      |      |      |      |
|------|----------|------|------|------|------|
| 1424 | ST074772 | 22.8 |      |      | 46.3 |
| 1425 | ST074773 | 60.0 | 50.4 |      | 46.9 |
| 1426 | ST074774 | 59.4 | 59.3 |      |      |
| 1427 | ST074775 | 30.4 | 58.3 | 64.3 | 52.2 |
| 1428 | ST074776 | 17.7 | 54.0 |      | 46.0 |
| 1429 | ST074777 | 31.1 | 58.6 |      |      |
| 1430 | ST074778 | 35.5 | 60.0 | 51.7 | 56.2 |
| 1431 | ST074779 | 21.5 | 58.3 | 54.5 | 56.0 |
| 1432 | ST074780 | 66.1 | 30.8 |      | 40.7 |
| 1433 | ST074781 | 3.2  | 61.1 | 64.2 | 58.8 |
| 1434 | ST074782 | 23.8 | 30.6 | 59.2 | 69.7 |
| 1435 | ST074783 | 41.8 | 57.2 | 58.5 | 59.4 |
| 1436 | ST074784 | 40.1 | 29.9 |      |      |
| 1437 | ST074785 | 49.0 | 30.9 |      |      |
| 1438 | ST074786 | 57.7 | 59.7 |      |      |
| 1439 | ST074787 | 53.8 | 58.0 |      | 56.6 |
| 1440 | ST074788 | 54.6 | 62.2 |      |      |
| 1441 | ST074789 |      |      |      | 58.6 |
| 1442 | ST074790 |      | 5.3  |      |      |
| 1443 | ST074791 |      |      |      |      |
| 1444 | ST074792 |      |      |      |      |
| 1445 | ST074793 | 7.7  |      |      |      |
| 1446 | ST074794 | 10.5 |      |      |      |
| 1447 | ST074795 | 11.2 |      |      |      |
| 1448 | ST074796 | 31.6 |      |      |      |
| 1449 | ST074797 |      |      |      |      |
| 1450 | ST074798 |      |      |      |      |
| 1451 | ST074799 | 14.3 |      |      |      |
| 1452 | ST074800 | 20.9 |      |      |      |
| 1453 | ST074801 | 7.4  |      |      |      |
| 1454 | ST074802 | 42.4 |      |      |      |
| 1455 | ST074803 | 74.0 | 17.5 |      |      |
| 1456 | ST074804 | 17.4 |      |      |      |
| 1457 | ST074805 | 48.2 | 18.8 |      |      |
| 1458 | ST074806 | 65.0 | 21.2 | 57.0 | 57.3 |
| 1459 | ST074807 | 5.9  |      |      |      |
| 1460 | ST074808 |      | 20.9 |      |      |
| 1461 | ST074809 | 17.4 | 13.7 |      |      |
| 1462 | ST074810 |      | 20.5 |      |      |
| 1463 | ST074811 | 43.1 |      | 53.1 | 45.8 |
| 1464 | ST074812 | 15.4 |      |      |      |
| 1465 | ST074813 | 19.1 | 80.4 | 49.0 |      |
| 1466 | ST074814 | 64.2 | 87.7 | 83.8 | 66.5 |
| 1467 | ST074815 | 83.5 | 85.5 | 86.8 | 38.0 |
| 1468 | ST074816 | 0.6  | 59.5 |      |      |
| 1469 | ST074817 | 8.8  | 87.1 | 83.3 | 60.1 |
| 1470 | ST074818 | 14.1 | 4.7  |      |      |
| 1471 | ST074819 | 16.8 | 9.9  | 73.6 |      |
| 1472 | ST074820 | 36.2 | 5.4  | 52.1 |      |
| 1473 | ST074821 | 36.8 | 12.3 | 77.1 | 68.0 |
| 1474 | ST074822 | 88.4 | 86.3 | 65.3 | 44.5 |



|      |          |      |      |      |      |
|------|----------|------|------|------|------|
| 1475 | ST074823 | 76.9 |      |      | 68.1 |
| 1476 | ST074824 | 35.1 | 4.4  |      |      |
| 1477 | ST074825 | 57.4 |      |      |      |
| 1478 | ST074826 |      |      |      |      |
| 1479 | ST074827 | 36.5 | 36.8 |      |      |
| 1480 | ST074828 | 9.7  | 27.4 |      |      |
| 1481 | ST074829 |      | 32.6 |      |      |
| 1482 | ST074830 | 27.3 | 85.3 |      | 45.9 |
| 1483 | ST074831 |      | 20.9 |      |      |
| 1484 | ST074832 | 20.3 | 66.7 |      |      |
| 1485 | ST074964 |      | 0.5  |      |      |
| 1486 | ST074967 |      |      |      |      |
| 1487 | ST074968 |      | 21.7 |      |      |
| 1488 | ST075011 | 19.2 | 10.8 |      |      |
| 1489 | ST075013 |      |      |      |      |
| 1490 | ST075014 | 4.2  | 22.3 |      |      |
| 1491 | ST075032 | 2.5  | 20.4 |      |      |
| 1492 | ST075035 | 26.2 | 53.5 |      |      |
| 1493 | ST075037 | 36.9 | 64.9 |      |      |
| 1494 | ST075038 |      | 49.1 |      |      |
| 1495 | ST075039 | 25.5 | 60.7 |      |      |
| 1496 | ST075048 | 47.1 | 46.6 |      | 60.4 |
| 1497 | ST075058 |      | 7.1  | 50.7 | 46.6 |
| 1498 | ST075059 | 35.3 |      |      |      |
| 1499 | ST075062 | 36.4 | 82.0 |      |      |
| 1500 | ST075076 | 35.2 | 32.3 |      |      |
| 1501 | ST075077 | 37.6 | 31.1 | 70.2 | 45.1 |
| 1502 | ST075087 | 72.4 | 30.9 |      |      |
| 1503 | ST075088 | 37.5 | 4.8  |      |      |
| 1504 | ST075089 | 48.8 | 59.6 |      |      |
| 1505 | ST075105 | 37.6 | 23.7 | 68.6 | 44.9 |
| 1506 | ST075111 |      | 30.9 | 73.0 |      |
| 1507 | ST075112 | 44.3 | 35.3 |      |      |
| 1508 | ST075134 |      | 93.4 |      |      |
| 1509 | ST075135 | 44.6 | 18.1 |      |      |
| 1510 | ST075149 | 28.3 | 48.8 |      |      |
| 1511 | ST075156 |      |      |      |      |
| 1512 | ST075157 | 92.6 |      |      |      |
| 1513 | ST075160 | 30.0 | 15.8 |      |      |
| 1514 | ST075163 | 34.3 | 30.3 |      |      |
| 1515 | ST075171 | 44.4 | 28.3 |      |      |
| 1516 | ST075175 | 47.8 | 91.8 |      |      |
| 1517 | ST075178 | 55.3 |      | 60.2 | 64.0 |
| 1518 | ST075199 | 25.8 |      |      | 58.4 |
| 1519 | ST075206 | 60.4 |      | 56.5 | 59.9 |
| 1520 | ST075231 | 61.2 | 2.5  |      |      |
| 1521 | ST075235 |      | 35.5 |      |      |
| 1522 | ST075254 | 8.6  |      |      |      |
| 1523 | ST075287 |      | 22.8 |      |      |
| 1524 | ST075297 | 5.2  | 10.4 |      | 53.1 |
| 1525 | ST075303 | 20.3 | 17.1 |      |      |

|      |          |      |      |       |      |
|------|----------|------|------|-------|------|
| 1526 | ST075304 |      | 36.2 |       |      |
| 1527 | ST075318 |      | 6.2  |       |      |
| 1528 | ST075319 | 18.5 |      | 61.0  | 68.8 |
| 1529 | ST075320 |      |      |       |      |
| 1530 | ST075321 |      |      |       |      |
| 1531 | ST075322 |      |      |       |      |
| 1532 | ST075323 | 24.7 | 14.5 |       |      |
| 1533 | ST075328 |      | 10.1 |       |      |
| 1534 | ST075389 |      |      |       |      |
| 1535 | ST075446 | 88.0 | 59.4 |       |      |
| 1536 | ST075549 |      | 37.3 | 120.7 |      |
| 1537 | ST075587 | 45.1 | 57.8 |       | 41.3 |
| 1538 | ST075588 | 8.4  | 41.0 |       | 54.4 |
| 1539 | ST075640 |      | 30.7 |       | 39.8 |
| 1540 | ST075655 |      | 49.6 |       | 40.1 |
| 1541 | ST075764 |      | 41.1 |       |      |
| 1542 | ST075797 |      | 71.0 |       |      |
| 1543 | ST075799 |      | 45.9 |       |      |
| 1544 | ST075802 | 20.2 | 79.5 |       |      |
| 1545 | ST075820 |      | 28.9 |       |      |
| 1546 | ST075833 |      | 2.5  | 53.8  |      |
| 1547 | ST075840 |      | 50.9 |       |      |
| 1548 | ST075865 | 41.3 | 45.9 |       |      |
| 1549 | ST075866 | 30.6 | 77.6 | 42.5  |      |
| 1550 | ST075876 | 51.4 | 75.4 |       |      |
| 1551 | ST075879 | 12.4 | 44.8 | 49.5  | 43.9 |
| 1552 | ST075882 | 16.4 | 19.9 | 68.3  |      |
| 1553 | ST075892 |      | 72.7 |       |      |
| 1554 | ST075896 |      | 8.2  |       |      |
| 1555 | ST075904 | 24.7 | 33.7 |       |      |
| 1556 | ST075906 | 95.3 | 86.5 | 54.3  |      |
| 1557 | ST076300 | 2.5  | 41.6 |       |      |
| 1558 | ST076301 |      | 32.7 |       |      |
| 1559 | ST076302 |      | 49.9 |       |      |
| 1560 | ST076303 | 16.9 | 27.8 |       |      |
| 1561 | ST076304 |      |      |       |      |
| 1562 | ST076305 |      |      |       |      |
| 1563 | ST076306 |      |      |       |      |
| 1564 | ST076307 |      | 63.2 |       |      |
| 1565 | ST076308 |      | 37.6 |       |      |
| 1566 | ST076309 | 49.8 | 41.8 | 50.1  |      |
| 1567 | ST076310 |      | 23.5 |       |      |
| 1568 | ST076311 | 27.8 | 68.2 |       |      |
| 1569 | ST076312 |      |      |       |      |
| 1570 | ST076314 |      |      |       |      |
| 1571 | ST076315 | 1.8  | 63.9 |       |      |
| 1572 | ST076316 | 59.8 | 64.1 |       |      |
| 1573 | ST076317 |      | 49.8 |       |      |
| 1574 | ST076318 |      | 11.1 |       |      |
| 1575 | ST076319 |      |      |       |      |
| 1576 | ST076320 |      |      |       |      |

---

|      |          |      |      |      |
|------|----------|------|------|------|
| 1577 | ST076321 |      |      |      |
| 1578 | ST076322 |      |      |      |
| 1579 | ST076323 |      |      |      |
| 1580 | ST076324 | 1.1  | 62.2 |      |
| 1581 | ST076325 |      | 11.6 |      |
| 1582 | ST076326 |      |      |      |
| 1583 | ST076327 |      | 9.8  | 52.4 |
| 1584 | ST076328 | 46.5 | 28.6 |      |
| 1585 | ST076329 |      | 13.3 |      |
| 1586 | ST076330 |      | 35.1 |      |
| 1587 | ST076331 | 25.1 | 75.0 |      |
| 1588 | ST076332 |      | 52.8 |      |
| 1589 | ST076333 | 67.6 | 67.3 |      |
| 1590 | ST076334 | 18.4 | 53.8 |      |
| 1591 | ST076337 |      | 42.8 |      |
| 1592 | ST076338 |      | 25.4 |      |
| 1593 | ST076339 |      |      |      |
| 1594 | ST076340 |      |      |      |
| 1595 | ST076341 |      |      | 65.4 |
| 1596 | ST076342 |      | 43.5 |      |
| 1597 | ST076343 |      |      |      |
| 1598 | ST076344 | 3.0  | 55.4 |      |
| 1599 | ST076345 |      | 28.0 |      |
| 1600 | ST076346 | 22.0 | 53.3 | 43.1 |
| 1601 | ST076347 | 40.6 |      |      |
| 1602 | ST076348 |      | 40.8 |      |
| 1603 | ST076350 |      | 26.9 |      |
| 1604 | ST076351 | 10.0 | 52.5 | 40.5 |
| 1605 | ST076352 | 37.3 | 31.1 |      |
| 1606 | ST076353 | 49.0 | 24.2 |      |
| 1607 | ST076354 | 18.6 | 43.8 |      |
| 1608 | ST076355 | 34.5 | 12.6 |      |
| 1609 | ST076356 |      | 23.5 |      |
| 1610 | ST076357 | 1.8  | 4.6  |      |
| 1611 | ST076358 |      | 8.5  |      |
| 1612 | ST076359 | 0.9  |      | 44.2 |
| 1613 | ST076361 | 18.0 | 85.8 |      |
| 1614 | ST076362 | 21.3 | 34.6 |      |
| 1615 | ST076363 | 26.7 | 23.0 |      |
| 1616 | ST076364 | 19.3 | 43.0 |      |
| 1617 | ST076365 | 19.3 |      |      |
| 1618 | ST076366 | 8.7  | 9.1  |      |
| 1619 | ST076367 | 7.1  | 38.1 |      |
| 1620 | ST076368 |      | 47.5 |      |
| 1621 | ST076370 |      | 5.9  |      |
| 1622 | ST076372 | 17.4 | 35.5 |      |
| 1623 | ST076373 | 6.4  | 25.2 |      |
| 1624 | ST076374 | 3.0  | 38.9 |      |
| 1625 | ST076375 |      |      |      |
| 1626 | ST076376 |      | 21.1 |      |
| 1627 | ST076377 |      | 21.3 |      |

|      |          |      |      |      |      |
|------|----------|------|------|------|------|
| 1628 | ST076378 |      | 39.1 |      |      |
| 1629 | ST076379 |      | 5.5  |      |      |
| 1630 | ST076380 |      | 24.1 |      |      |
| 1631 | ST076381 |      |      | 42.4 |      |
| 1632 | ST076382 | 43.3 | 54.0 |      | 43.6 |
| 1633 | ST076384 |      |      | 51.8 |      |
| 1634 | ST076385 |      |      |      | 46.9 |
| 1635 | ST076386 |      | 29.3 |      |      |
| 1636 | ST076387 |      | 16.1 |      |      |
| 1637 | ST076388 | 8.7  | 24.6 |      |      |
| 1638 | ST076389 |      | 34.2 |      |      |
| 1639 | ST076390 | 27.3 | 42.3 |      |      |
| 1640 | ST076391 |      | 16.3 |      | 51.6 |
| 1641 | ST076392 |      | 17.7 |      |      |
| 1642 | ST076393 |      | 3.2  | 43.1 |      |
| 1643 | ST076394 |      | 19.4 | 44.8 |      |
| 1644 | ST076395 |      | 3.0  |      |      |
| 1645 | ST076396 |      | 29.6 |      | 45.0 |
| 1646 | ST076397 |      |      | 41.6 |      |
| 1647 | ST076398 | 23.5 | 33.7 |      | 51.5 |
| 1648 | ST076399 | 3.6  | 35.8 | 50.0 | 51.0 |
| 1649 | ST076400 | 47.2 | 51.7 |      |      |
| 1650 | ST076401 |      | 44.9 |      |      |
| 1651 | ST076402 |      | 15.5 |      |      |
| 1652 | ST076403 | 12.8 | 31.0 |      |      |
| 1653 | ST076405 |      |      |      | 53.3 |
| 1654 | ST076406 |      | 17.0 |      |      |
| 1655 | ST076462 |      | 12.3 | 59.3 | 43.0 |
| 1656 | ST076508 | 23.9 | 35.7 |      |      |
| 1657 | ST076514 |      | 28.5 |      |      |
| 1658 | ST076515 | 15.8 | 5.0  |      |      |
| 1659 | ST076521 |      | 49.7 |      |      |
| 1660 | ST076522 |      | 2.2  |      |      |
| 1661 | ST076526 | 10.8 | 27.7 |      |      |
| 1662 | ST076527 | 18.1 | 44.3 |      |      |
| 1663 | ST076533 | 18.4 | 14.3 |      |      |
| 1664 | ST076534 | 7.1  | 55.1 |      |      |
| 1665 | ST076538 |      | 21.8 |      |      |
| 1666 | ST076545 |      |      |      |      |
| 1667 | ST076550 | 2.2  | 40.5 |      |      |
| 1668 | ST076613 | 24.1 | 42.0 |      |      |
| 1669 | ST076724 |      | 48.9 |      |      |
| 1670 | ST076727 |      | 25.3 | 44.6 |      |
| 1671 | ST076818 |      | 47.8 |      |      |
| 1672 | ST076837 |      | 37.4 |      |      |
| 1673 | ST076838 |      | 35.3 |      |      |
| 1674 | ST076839 |      | 13.7 |      |      |
| 1675 | ST076848 | 39.7 | 45.9 |      |      |
| 1676 | ST076857 | 72.7 | 65.6 |      |      |
| 1677 | ST076861 |      | 21.3 |      |      |
| 1678 | ST076873 |      | 48.4 |      |      |

|      |          |      |      |      |      |
|------|----------|------|------|------|------|
| 1679 | ST076874 | 17.2 | 32.4 |      |      |
| 1680 | ST076889 | 7.5  | 6.4  |      |      |
| 1681 | ST076895 |      | 60.3 |      |      |
| 1682 | ST076896 |      | 53.4 |      |      |
| 1683 | ST076904 | 2.0  | 28.4 |      |      |
| 1684 | ST076905 | 1.9  |      | 50.3 |      |
| 1685 | ST076906 | 30.9 | 64.3 |      |      |
| 1686 | ST076907 |      | 77.6 |      |      |
| 1687 | ST076913 |      | 50.3 |      |      |
| 1688 | ST076914 | 41.0 | 76.0 |      |      |
| 1689 | ST076915 | 31.9 | 63.1 |      |      |
| 1690 | ST076932 | 66.3 | 65.2 |      |      |
| 1691 | ST076938 | 9.5  | 31.5 |      |      |
| 1692 | ST076942 | 9.2  | 56.1 |      |      |
| 1693 | ST076944 | 54.3 | 77.2 |      |      |
| 1694 | ST076978 | 32.0 | 73.4 |      |      |
| 1695 | ST077036 | 48.1 | 70.2 |      |      |
| 1696 | ST077037 | 64.4 | 58.6 |      |      |
| 1697 | ST077110 | 87.7 | 92.5 |      |      |
| 1698 | ST077117 | 91.3 | 96.1 |      |      |
| 1699 | ST077118 | 24.3 | 40.1 |      |      |
| 1700 | ST077134 | 39.1 | 41.0 |      |      |
| 1701 | ST077135 | 18.4 | 43.0 | 46.6 |      |
| 1702 | ST077138 | 65.2 | 66.1 | 55.0 |      |
| 1703 | ST077157 | 60.8 | 64.6 | 51.2 |      |
| 1704 | ST077158 | 57.1 | 57.1 | 41.4 |      |
| 1705 | ST077160 | 43.2 | 67.9 |      |      |
| 1706 | ST077161 | 58.4 | 67.4 |      |      |
| 1707 | ST077163 | 48.6 | 59.1 |      |      |
| 1708 | ST077164 | 39.7 | 64.7 |      |      |
| 1709 | ST077167 | 61.2 | 65.5 | 45.1 |      |
| 1710 | ST077168 | 40.9 | 62.5 |      |      |
| 1711 | ST077169 | 62.7 | 71.6 |      |      |
| 1712 | ST077170 | 31.8 | 51.1 | 43.7 |      |
| 1713 | ST077171 | 6.9  | 71.1 |      |      |
| 1714 | ST077176 | 16.4 |      |      |      |
| 1715 | ST077195 | 24.8 | 72.1 |      |      |
| 1716 | ST077221 | 27.3 | 40.0 |      |      |
| 1717 | ST077232 | 90.2 | 42.2 |      |      |
| 1718 | ST077236 | 63.6 | 58.7 |      |      |
| 1719 | ST077305 | 75.5 | 62.8 |      |      |
| 1720 | ST077333 | 21.3 | 32.2 |      |      |
| 1721 | ST077334 | 18.3 | 79.4 | 54.2 |      |
| 1722 | ST077335 | 17.1 | 63.7 |      |      |
| 1723 | ST077340 | 15.8 | 67.1 |      |      |
| 1724 | ST077341 |      | 51.4 | 67.0 | 39.1 |
| 1725 | ST077344 |      | 34.6 |      |      |
| 1726 | ST077356 | 71.8 | 87.2 |      |      |
| 1727 | ST077382 | 16.5 | 47.5 |      |      |
| 1728 | ST077383 | 59.2 | 62.2 |      |      |
| 1729 | ST077384 | 31.4 | 37.4 |      |      |

|      |          |      |      |      |      |
|------|----------|------|------|------|------|
| 1730 | ST077385 | 25.9 | 23.4 |      |      |
| 1731 | ST077386 | 16.9 | 1.1  |      | 80.5 |
| 1732 | ST077387 | 36.0 | 56.7 |      |      |
| 1733 | ST077388 | 29.1 | 57.7 |      |      |
| 1734 | ST077389 | 13.4 | 42.3 | 58.9 | 62.6 |
| 1735 | ST077390 | 20.4 | 53.4 |      |      |
| 1736 | ST077391 | 46.9 | 39.9 |      | 47.5 |
| 1737 | ST077392 | 1.8  | 46.6 |      |      |
| 1738 | ST077393 | 2.9  | 32.9 |      |      |
| 1739 | ST077394 | 20.2 | 38.8 |      |      |
| 1740 | ST077395 | 26.6 | 44.8 |      | 58.1 |
| 1741 | ST077396 | 23.8 | 57.1 |      |      |
| 1742 | ST077397 |      | 53.3 |      | 46.6 |
| 1743 | ST077398 | 20.3 | 35.4 |      | 53.2 |
| 1744 | ST077399 |      |      |      | 76.9 |
| 1745 | ST077400 | 9.0  | 64.6 |      |      |
| 1746 | ST077401 | 16.6 | 21.8 |      |      |
| 1747 | ST077402 |      | 10.2 |      |      |
| 1748 | ST077403 | 24.4 | 43.1 |      |      |
| 1749 | ST077404 | 36.0 | 48.0 |      |      |
| 1750 | ST077405 | 21.6 | 42.0 |      |      |
| 1751 | ST077406 | 30.9 | 30.7 |      |      |
| 1752 | ST077407 | 22.6 | 67.5 |      |      |
| 1753 | ST077408 | 15.0 | 76.0 |      |      |
| 1754 | ST077409 |      | 36.7 |      |      |
| 1755 | ST077410 |      | 22.5 |      |      |
| 1756 | ST077411 | 22.5 | 36.0 |      |      |
| 1757 | ST077412 | 3.6  | 36.5 | 51.8 |      |
| 1758 | ST077413 |      | 41.5 |      |      |
| 1759 | ST077414 | 51.0 | 9.6  |      | 53.2 |
| 1760 | ST077415 | 41.6 | 64.4 | 56.3 | 48.5 |
| 1761 | ST077416 | 54.7 | 54.0 | 46.8 |      |
| 1762 | ST077417 |      | 25.8 | 48.6 |      |
| 1763 | ST077418 | 53.9 | 59.7 |      |      |
| 1764 | ST077419 | 30.1 | 10.2 | 49.8 |      |
| 1765 | ST077420 | 12.1 | 24.9 |      |      |
| 1766 | ST077421 | 35.5 | 43.5 |      |      |
| 1767 | ST077422 | 27.1 | 60.2 |      |      |
| 1768 | ST077423 | 46.0 | 49.7 |      |      |
| 1769 | ST077424 | 37.1 | 20.7 | 68.8 |      |
| 1770 | ST077425 | 24.4 | 23.5 |      |      |
| 1771 | ST077426 | 27.2 | 19.7 | 42.5 |      |
| 1772 | ST077427 | 24.8 | 47.8 |      |      |
| 1773 | ST077428 | 42.2 | 62.1 |      |      |
| 1774 | ST077429 | 20.6 | 20.6 |      |      |
| 1775 | ST077430 | 32.7 | 16.5 |      |      |
| 1776 | ST077431 | 41.4 | 0.7  |      |      |
| 1777 | ST077432 |      |      |      |      |
| 1778 | ST077433 | 36.4 | 34.8 | 58.2 |      |
| 1779 | ST077434 | 34.9 |      | 53.9 |      |
| 1780 | ST077435 | 16.3 | 11.9 |      |      |

|      |          |      |      |      |      |
|------|----------|------|------|------|------|
| 1781 | ST077436 | 19.1 | 17.7 |      |      |
| 1782 | ST077437 | 0.9  | 1.7  |      | 52.6 |
| 1783 | ST077438 | 53.8 | 43.7 |      |      |
| 1784 | ST077439 | 59.1 | 34.7 |      |      |
| 1785 | ST077440 | 10.6 | 12.1 | 57.0 | 58.5 |
| 1786 | ST077441 | 16.9 | 47.6 |      |      |
| 1787 | ST077442 | 2.2  | 24.3 | 70.5 |      |
| 1788 | ST077443 | 15.2 | 34.2 | 55.4 |      |
| 1789 | ST077444 | 33.7 | 41.5 |      |      |
| 1790 | ST077445 | 20.7 | 29.8 | 56.4 |      |
| 1791 | ST077446 | 11.9 | 56.4 |      |      |
| 1792 | ST077447 | 28.4 | 31.3 | 40.5 |      |
| 1793 | ST077448 | 1.4  | 9.9  | 73.0 | 68.4 |
| 1794 | ST077449 | 19.4 | 36.6 | 67.8 |      |
| 1795 | ST077450 | 17.0 | 36.3 | 51.8 |      |
| 1796 | ST077451 | 26.7 | 39.3 |      |      |
| 1797 | ST077452 | 27.4 | 41.0 | 70.2 | 45.9 |
| 1798 | ST077453 | 12.9 | 24.6 | 52.8 |      |
| 1799 | ST077454 | 23.0 | 44.0 | 61.3 |      |
| 1800 | ST077455 | 27.3 | 40.0 | 56.5 |      |
| 1801 | ST077456 | 20.2 | 30.7 |      |      |
| 1802 | ST077457 | 17.4 |      |      |      |
| 1803 | ST077458 | 15.4 | 28.4 |      |      |
| 1804 | ST077459 | 46.2 | 48.1 | 42.6 |      |
| 1805 | ST077460 | 15.3 | 29.9 | 40.6 |      |
| 1806 | ST077461 | 18.7 | 29.6 | 42.9 |      |
| 1807 | ST077462 | 10.2 | 37.5 |      |      |
| 1808 | ST077514 | 54.6 | 34.6 |      |      |
| 1809 | ST077581 | 38.6 | 43.1 | 41.9 |      |
| 1810 | ST077614 | 42.2 | 69.1 | 51.7 |      |
| 1811 | ST077732 | 20.7 | 48.7 | 59.6 |      |
| 1812 | ST077733 | 14.5 | 37.3 | 58.0 |      |
| 1813 | ST077755 | 27.9 | 54.8 | 45.7 |      |
| 1814 | ST077771 | 40.8 | 66.9 | 46.7 |      |
| 1815 | ST077906 | 59.2 | 61.5 | 40.0 |      |
| 1816 | ST077912 | 33.4 | 4.7  |      |      |
| 1817 | ST077918 | 23.6 | 35.4 | 46.6 |      |
| 1818 | ST077919 |      |      | 75.9 | 56.0 |
| 1819 | ST077923 | 56.1 | 72.9 |      |      |
| 1820 | ST077924 | 11.1 | 12.3 | 61.3 |      |
| 1821 | ST077925 | 3.7  | 23.5 | 69.0 |      |
| 1822 | ST077927 | 19.4 | 36.2 |      |      |
| 1823 | ST077936 | 14.1 | 0.1  |      | 66.0 |
| 1824 | ST077942 | 51.5 | 45.0 | 53.6 | 40.3 |
| 1825 | ST077946 | 39.3 | 47.3 |      |      |
| 1826 | ST077948 | 10.3 | 24.0 | 73.5 |      |
| 1827 | ST077955 | 52.0 |      | 48.7 | 53.9 |
| 1828 | ST077957 | 26.2 | 40.1 | 50.5 |      |
| 1829 | ST077958 | 24.3 | 62.1 | 65.3 |      |
| 1830 | ST077972 | 36.8 | 65.6 | 62.9 |      |
| 1831 | ST078003 | 28.9 | 38.7 |      |      |

|      |          |      |      |      |      |
|------|----------|------|------|------|------|
| 1832 | ST078016 | 47.0 | 36.8 | 74.9 |      |
| 1833 | ST078022 | 47.7 | 72.6 | 47.9 |      |
| 1834 | ST078024 | 24.5 | 45.2 |      |      |
| 1835 | ST078025 | 88.1 | 94.5 |      | 99.7 |
| 1836 | ST078026 | 0.6  | 29.0 | 91.1 |      |
| 1837 | ST078028 | 49.0 | 64.3 |      |      |
| 1838 | ST078029 | 60.5 | 68.8 |      |      |
| 1839 | ST078030 | 27.1 | 65.5 |      |      |
| 1840 | ST078051 | 39.7 | 38.7 | 45.2 |      |
| 1841 | ST078053 | 2.4  | 54.8 |      |      |
| 1842 | ST078054 |      | 40.0 |      |      |
| 1843 | ST078077 | 4.7  | 23.8 |      |      |
| 1844 | ST078078 |      | 75.9 |      |      |
| 1845 | ST078096 |      | 40.4 |      |      |
| 1846 | ST078099 |      | 17.7 |      |      |
| 1847 | ST078109 |      | 14.5 |      |      |
| 1848 | ST078122 |      | 46.4 |      |      |
| 1849 | ST078197 |      | 68.6 |      |      |
| 1850 | ST078242 |      | 52.1 |      |      |
| 1851 | ST078251 |      | 64.9 | 59.6 |      |
| 1852 | ST078265 | 29.7 | 95.2 |      |      |
| 1853 | ST078267 |      | 61.0 |      |      |
| 1854 | ST078268 | 17.4 | 86.3 |      |      |
| 1855 | ST078275 |      | 79.6 |      |      |
| 1856 | ST078278 |      | 16.3 |      |      |
| 1857 | ST078281 | 99.9 | 86.1 |      |      |
| 1858 | ST078287 | 5.6  | 66.4 |      |      |
| 1859 | ST078297 | 8.0  | 71.6 |      |      |
| 1860 | ST078299 |      | 54.2 |      |      |
| 1861 | ST078300 |      | 55.2 |      |      |
| 1862 | ST078301 |      | 56.5 |      |      |
| 1863 | ST078306 |      | 77.1 |      |      |
| 1864 | ST078333 |      | 58.8 |      |      |
| 1865 | ST078336 |      | 56.1 |      |      |
| 1866 | ST078349 | 11.7 | 26.0 |      |      |
| 1867 | ST078350 |      | 84.8 |      |      |
| 1868 | ST078351 |      | 83.3 |      |      |
| 1869 | ST078357 |      | 59.1 |      |      |
| 1870 | ST078458 |      | 62.5 |      |      |
| 1871 | ST078484 |      | 59.5 |      |      |
| 1872 | ST078496 |      |      |      |      |
| 1873 | ST078527 |      | 61.1 |      |      |
| 1874 | ST078528 |      | 76.7 |      |      |
| 1875 | ST078545 |      | 86.5 |      |      |
| 1876 | ST078547 |      | 72.4 |      |      |
| 1877 | ST078548 |      | 77.6 | 38.7 |      |
| 1878 | ST078549 |      | 77.0 |      |      |
| 1879 | ST078550 |      | 50.4 | 33.6 |      |
| 1880 | ST078551 | 40.3 | 66.2 |      |      |
| 1881 | ST078552 |      | 53.4 |      |      |
| 1882 | ST078553 |      | 0.0  |      |      |



|      |          |      |       |      |      |
|------|----------|------|-------|------|------|
| 1883 | ST078554 |      | 25.2  |      |      |
| 1884 | ST078555 |      | 2.3   |      |      |
| 1885 | ST078556 | 49.1 | 80.8  |      |      |
| 1886 | ST078557 |      | 41.2  |      |      |
| 1887 | ST078558 | 9.5  | 7.7   |      |      |
| 1888 | ST078559 |      | 11.8  |      |      |
| 1889 | ST078560 |      | 71.7  |      |      |
| 1890 | ST078561 | 29.9 | 47.5  |      |      |
| 1891 | ST078562 |      | 49.3  |      |      |
| 1892 | ST078563 |      | 15.5  |      |      |
| 1893 | ST078564 |      | 38.7  |      |      |
| 1894 | ST078565 |      | 50.5  |      |      |
| 1895 | ST078566 |      | 26.7  |      |      |
| 1896 | ST078567 |      | 9.3   | 42.5 | 51.6 |
| 1897 | ST078568 |      | 50.3  |      |      |
| 1898 | ST078569 |      |       |      |      |
| 1899 | ST078570 |      | 34.0  |      |      |
| 1900 | ST078571 |      | 25.7  |      |      |
| 1901 | ST078572 |      | 33.2  |      |      |
| 1902 | ST078573 |      | 30.1  |      |      |
| 1903 | ST078574 |      | 25.4  |      |      |
| 1904 | ST078575 | 7.5  |       |      |      |
| 1905 | ST078576 | 4.7  | 106.7 |      |      |
| 1906 | ST078577 |      | 41.9  |      |      |
| 1907 | ST078621 |      | 65.7  |      |      |
| 1908 | ST078653 |      | 51.4  |      |      |
| 1909 | ST078654 | 1.9  | 59.2  |      |      |
| 1910 | ST078655 | 6.3  | 78.8  |      |      |
| 1911 | ST078656 |      | 11.2  |      |      |
| 1912 | ST078657 |      | 26.0  |      | 50.4 |
| 1913 | ST078658 |      |       |      |      |
| 1914 | ST078659 |      |       |      |      |
| 1915 | ST078660 |      |       |      |      |
| 1916 | ST078661 |      |       |      |      |
| 1917 | ST078663 |      |       |      |      |
| 1918 | ST078664 |      | 7.8   |      |      |
| 1919 | ST078665 |      |       |      |      |
| 1920 | ST078666 |      |       |      |      |
| 1921 | ST078667 |      | 23.7  | 43.9 |      |
| 1922 | ST078668 |      | 59.1  |      |      |
| 1923 | ST078669 |      | 43.3  |      |      |
| 1924 | ST078670 |      | 21.7  |      |      |
| 1925 | ST078671 | 0.8  | 45.1  |      |      |
| 1926 | ST078672 | 16.6 | 59.8  |      |      |
| 1927 | ST078673 | 49.0 | 54.6  | 42.0 |      |
| 1928 | ST078674 | 69.3 | 55.8  |      |      |
| 1929 | ST078675 |      |       | 45.4 | 41.2 |
| 1930 | ST078676 |      | 8.9   | 67.0 | 61.4 |
| 1931 | ST078677 | 52.6 |       | 44.5 |      |
| 1932 | ST078678 |      | 26.5  |      |      |
| 1933 | ST078679 | 3.3  | 23.5  |      |      |

|      |          |      |      |      |      |
|------|----------|------|------|------|------|
| 1934 | ST078680 |      |      | 42.7 |      |
| 1935 | ST078681 | 14.5 | 46.0 |      |      |
| 1936 | ST078682 |      | 59.7 | 41.8 |      |
| 1937 | ST078683 |      | 51.1 |      | 40.4 |
| 1938 | ST078684 |      | 67.3 | 46.1 | 46.0 |
| 1939 | ST078685 |      | 73.2 | 40.4 |      |
| 1940 | ST078686 |      | 51.6 |      |      |
| 1941 | ST078687 | 3.1  | 30.3 |      |      |
| 1942 | ST078688 |      | 34.5 |      |      |
| 1943 | ST078689 |      | 54.0 |      |      |
| 1944 | ST078690 | 47.8 | 24.6 |      |      |
| 1945 | ST078691 |      | 26.5 |      | 72.2 |
| 1946 | ST078692 |      | 32.0 |      | 54.6 |
| 1947 | ST078693 |      | 42.0 |      |      |
| 1948 | ST078694 | 5.8  | 9.9  |      |      |
| 1949 | ST078696 |      |      |      |      |
| 1950 | ST078697 |      | 27.6 | 43.7 |      |
| 1951 | ST078698 |      |      |      |      |
| 1952 | ST078699 |      |      |      |      |
| 1953 | ST078700 |      |      |      |      |
| 1954 | ST078701 |      | 3.9  |      |      |
| 1955 | ST078702 | 45.6 | 52.1 |      |      |
| 1956 | ST078703 | 34.0 | 6.1  |      |      |
| 1957 | ST078704 | 11.2 | 14.5 |      |      |
| 1958 | ST078705 | 8.5  | 31.1 |      |      |
| 1959 | ST078706 | 23.9 | 18.6 |      |      |
| 1960 | ST078707 | 24.7 | 32.2 |      |      |
| 1961 | ST078708 | 24.3 | 67.7 |      | 63.4 |
| 1962 | ST078709 | 9.8  | 81.6 |      | 54.3 |
| 1963 | ST078710 | 34.9 | 63.2 |      |      |
| 1964 | ST078711 | 10.3 | 4.4  |      | 46.6 |
| 1965 | ST078712 | 9.4  | 20.3 |      |      |
| 1966 | ST078713 |      | 58.1 |      |      |
| 1967 | ST078714 |      | 44.1 |      |      |
| 1968 | ST078715 |      | 22.4 |      | 57.0 |
| 1969 | ST078790 | 79.0 |      | 55.3 | 62.1 |
| 1970 | ST078813 |      |      |      | 44.0 |
| 1971 | ST078878 | 2.8  | 16.3 |      |      |
| 1972 | ST078907 | 72.6 |      |      | 41.7 |
| 1973 | ST078934 | 11.0 |      |      | 44.4 |
| 1974 | ST079028 |      | 5.8  |      |      |
| 1975 | ST079153 |      | 14.4 | 71.9 |      |
| 1976 | ST079155 |      | 29.6 |      | 50.8 |
| 1977 | ST079165 |      |      | 57.6 |      |
| 1978 | ST079167 |      |      |      | 56.8 |
| 1979 | ST079280 |      |      |      | 68.8 |
| 1980 | ST079282 | 90.9 |      |      | 60.7 |
| 1981 | ST079284 |      |      |      |      |
| 1982 | ST079289 | 1.4  | 9.7  |      | 63.4 |
| 1983 | ST079364 |      | 9.1  |      | 82.1 |
| 1984 | ST079369 |      | 20.6 |      |      |

|      |          |      |      |      |      |
|------|----------|------|------|------|------|
| 1985 | ST079453 | 59.7 | 18.7 |      |      |
| 1986 | ST079476 |      | 65.8 |      | 42.0 |
| 1987 | ST079484 | 44.2 | 8.7  |      |      |
| 1988 | ST079485 | 15.9 | 10.9 |      |      |
| 1989 | ST079489 | 56.5 | 69.8 |      |      |
| 1990 | ST079495 |      | 19.1 |      |      |
| 1991 | ST079499 |      |      |      | 70.2 |
| 1992 | ST079500 | 10.2 | 4.6  |      | 74.8 |
| 1993 | ST079501 |      | 5.9  | 68.2 |      |
| 1994 | ST079502 | 94.3 | 8.0  |      | 70.7 |
| 1995 | ST079503 |      | 17.8 |      |      |
| 1996 | ST079530 | 52.8 | 20.4 |      |      |
| 1997 | ST079544 | 39.6 |      |      |      |
| 1998 | ST079545 | 36.3 |      |      | 43.0 |
| 1999 | ST079546 | 39.3 | 11.8 |      |      |
| 2000 | ST079547 | 26.9 |      |      | 63.5 |
| 2001 | ST079548 | 7.6  |      |      |      |
| 2002 | ST079564 | 7.5  |      | 47.3 |      |
| 2003 | ST079565 |      |      |      |      |
| 2004 | ST079566 | 11.3 | 11.8 |      |      |
| 2005 | ST079567 |      | 17.4 | 60.9 |      |
| 2006 | ST079623 | 11.4 | 13.6 |      |      |
| 2007 | ST079624 | 19.2 | 6.0  |      |      |
| 2008 | ST079630 | 62.1 | 98.1 |      |      |
| 2009 | ST079631 |      |      |      |      |
| 2010 | ST079632 |      |      |      |      |
| 2011 | ST079633 |      |      |      |      |
| 2012 | ST079635 |      | 54.4 |      |      |
| 2013 | ST079636 |      | 36.8 |      |      |
| 2014 | ST079637 |      | 14.3 |      |      |
| 2015 | ST079638 |      | 28.9 |      |      |
| 2016 | ST079639 | 24.6 | 48.4 |      |      |
| 2017 | ST079640 |      |      | 42.5 |      |
| 2018 | ST079641 |      | 11.5 |      |      |
| 2019 | ST079642 |      | 22.6 |      |      |
| 2020 | ST079643 |      | 5.5  |      |      |
| 2021 | ST079644 |      | 35.3 |      |      |
| 2022 | ST079645 |      | 31.6 |      |      |
| 2023 | ST079646 |      | 21.1 |      |      |
| 2024 | ST079647 | 6.0  | 36.8 |      |      |
| 2025 | ST079648 | 13.9 | 35.3 |      |      |
| 2026 | ST079649 | 2.9  | 25.4 |      |      |
| 2027 | ST079650 | 19.4 | 23.4 |      |      |
| 2028 | ST079651 | 14.5 | 35.5 |      |      |
| 2029 | ST079652 | 7.6  | 13.8 | 78.3 |      |
| 2030 | ST079653 |      | 14.5 | 51.5 |      |
| 2031 | ST079654 |      | 28.5 |      |      |
| 2032 | ST079657 | 80.3 | 42.8 | 48.1 |      |
| 2033 | ST079659 |      | 27.3 |      |      |
| 2034 | ST079660 |      | 31.2 |      |      |
| 2035 | ST079726 |      | 27.3 |      |      |

|      |          |      |      |      |       |
|------|----------|------|------|------|-------|
| 2036 | ST079871 | 8.9  | 32.6 |      |       |
| 2037 | ST080029 |      | 24.6 |      |       |
| 2038 | ST080040 | 18.1 | 33.0 |      |       |
| 2039 | ST080041 |      | 50.0 |      |       |
| 2040 | ST080052 | 16.9 | 46.2 | 56.7 |       |
| 2041 | ST080056 | 40.7 | 45.8 |      |       |
| 2042 | ST080057 | 53.7 | 41.2 |      |       |
| 2043 | ST080074 |      | 26.6 |      |       |
| 2044 | ST080076 |      | 35.8 | 40.8 |       |
| 2045 | ST080077 | 40.8 | 44.8 |      |       |
| 2046 | ST080081 |      | 28.1 |      |       |
| 2047 | ST080082 |      | 42.1 |      |       |
| 2048 | ST080083 | 8.4  | 27.5 |      |       |
| 2049 | ST080087 | 0.8  | 11.9 |      |       |
| 2050 | ST080089 | 11.8 | 16.1 |      |       |
| 2051 | ST080090 |      | 35.2 |      |       |
| 2052 | ST080091 | 8.3  | 69.1 |      |       |
| 2053 | ST080092 | 2.5  | 12.2 |      |       |
| 2054 | ST080096 | 16.8 | 54.0 |      |       |
| 2055 | ST080105 | 40.8 | 15.5 |      |       |
| 2056 | ST080125 | 48.6 | 46.2 |      |       |
| 2057 | ST080126 |      | 26.8 | 49.1 |       |
| 2058 | ST080127 |      | 33.2 | 52.7 |       |
| 2059 | ST080128 |      | 34.9 |      |       |
| 2060 | ST080239 |      | 27.7 |      |       |
| 2061 | ST080343 |      | 16.7 |      |       |
| 2062 | ST080500 |      | 25.5 |      |       |
| 2063 | ST080581 |      | 7.3  | 41.7 |       |
| 2064 | ST080583 |      | 29.6 | 51.2 |       |
| 2065 | ST080592 | 54.1 | 48.7 |      |       |
| 2066 | ST080596 | 68.9 | 18.3 |      |       |
| 2067 | ST080640 | 23.3 | 61.7 |      |       |
| 2068 | ST080648 | 55.3 | 51.8 |      |       |
| 2069 | ST080679 | 88.7 | 97.0 |      |       |
| 2070 | ST080689 |      | 15.8 |      |       |
| 2071 | ST080919 | 11.1 | 34.3 |      |       |
| 2072 | ST080920 | 2.3  | 18.8 |      |       |
| 2073 | ST080922 |      |      |      |       |
| 2074 | ST080924 | 5.7  | 46.5 |      |       |
| 2075 | ST081095 | 5.4  | 69.1 |      |       |
| 2076 | ST081112 |      | 7.5  |      |       |
| 2077 | ST081146 |      | 27.6 |      |       |
| 2078 | ST081199 |      | 38.8 |      |       |
| 2079 | ST081307 |      |      |      |       |
| 2080 | ST081308 |      | 51.6 |      |       |
| 2081 | ST081309 | 7.1  | 32.4 |      |       |
| 2082 | ST081329 |      | 76.4 |      |       |
| 2083 | ST081332 | 69.1 | 91.0 |      |       |
| 2084 | ST081356 | 95.4 | 99.8 | 99.2 | 100.2 |
| 2085 | ST081364 | 44.7 | 65.0 |      | 59.4  |
| 2086 | ST081380 | 93.0 | 99.8 | 46.2 | 102.0 |

|      |          |       |       |      |
|------|----------|-------|-------|------|
| 2087 | ST081391 |       | 50.9  | 40.7 |
| 2088 | ST082106 |       | 59.4  |      |
| 2089 | ST082211 |       | 23.0  |      |
| 2090 | ST082217 | 2.3   | 40.2  | 40.5 |
| 2091 | ST082221 | 4.6   | 55.2  |      |
| 2092 | ST082228 | 26.1  | 51.3  |      |
| 2093 | ST082229 | 89.0  | 87.1  |      |
| 2094 | ST082231 | 18.6  | 55.6  |      |
| 2095 | ST082266 |       | 31.9  | 56.0 |
| 2096 | ST082331 | 42.0  | 45.9  |      |
| 2097 | ST082475 |       | 30.1  |      |
| 2098 | ST082500 | 22.2  | 45.7  |      |
| 2099 | ST082525 | 6.9   | 36.5  |      |
| 2100 | ST082627 | 33.6  | 51.6  |      |
| 2101 | ST082628 | 23.3  | 40.7  |      |
| 2102 | ST082643 | 4.2   | 24.2  |      |
| 2103 | ST082651 | 2.8   | 52.8  | 46.1 |
| 2104 | ST082661 | 75.3  | 44.2  |      |
| 2105 | ST082675 | 15.8  | 31.6  |      |
| 2106 | ST082678 | 16.9  | 45.9  |      |
| 2107 | ST082692 | 27.3  | 50.2  |      |
| 2108 | ST082719 | 14.7  | 38.6  |      |
| 2109 | ST082735 | 44.4  | 53.5  |      |
| 2110 | ST082824 | 46.9  | 35.9  |      |
| 2111 | ST083053 | 2.2   | 33.5  | 47.2 |
| 2112 | ST083078 | 19.4  | 34.5  |      |
| 2113 | ST083088 | 23.0  | 27.8  | 46.8 |
| 2114 | ST083089 | 27.9  | 48.3  |      |
| 2115 | ST083090 | 39.9  | 51.2  |      |
| 2116 | ST083091 | 10.1  | 42.1  | 43.4 |
| 2117 | ST083092 | 101.8 | 101.9 |      |
| 2118 | ST083093 | 67.5  | 101.4 |      |
| 2119 | ST083110 | 5.0   | 48.4  |      |
| 2120 | ST083122 | 30.5  | 57.1  | 59.8 |
| 2121 | ST083127 |       | 3.3   | 46.2 |
| 2122 | ST083128 | 32.3  | 51.5  | 50.5 |
| 2123 | ST083129 | 12.7  | 28.4  |      |
| 2124 | ST083130 | 24.1  | 50.0  |      |
| 2125 | ST083131 | 9.7   | 34.1  |      |
| 2126 | ST083132 | 47.4  | 89.4  |      |
| 2127 | ST083133 | 20.1  | 51.3  |      |
| 2128 | ST083134 | 22.7  | 48.2  |      |
| 2129 | ST083256 |       | 55.0  |      |
| 2130 | ST083266 |       | 44.8  | 40.9 |
| 2131 | ST083274 | 4.7   | 36.2  |      |
| 2132 | ST083302 |       | 43.4  |      |
| 2133 | ST083484 | 19.9  | 50.5  |      |
| 2134 | ST083487 | 11.9  | 44.5  |      |
| 2135 | ST083581 | 4.7   | 45.2  |      |
| 2136 | ST083600 |       | 38.5  | 56.0 |
| 2137 | ST083605 | 17.6  | 50.2  |      |

|      |          |      |      |      |      |
|------|----------|------|------|------|------|
| 2138 | ST083608 | 7.9  | 31.4 |      |      |
| 2139 | ST083626 |      | 33.6 |      |      |
| 2140 | ST083629 | 8.3  | 49.2 |      |      |
| 2141 | ST083675 | 45.8 | 52.9 |      |      |
| 2142 | ST083836 | 45.7 | 39.7 |      |      |
| 2143 | ST083912 | 13.0 | 34.0 |      |      |
| 2144 | ST084047 | 18.3 | 53.0 |      |      |
| 2145 | ST084404 | 2.7  | 34.8 |      |      |
| 2146 | ST084741 | 12.8 | 29.5 |      |      |
| 2147 | ST084802 | 11.8 | 37.8 |      |      |
| 2148 | ST084836 | 18.3 | 41.3 |      |      |
| 2149 | ST085104 | 42.5 | 88.3 | 63.7 |      |
| 2150 | ST085493 | 24.3 | 38.4 |      |      |
| 2151 | ST085494 | 71.0 | 85.4 |      |      |
| 2152 | ST085666 | 29.8 | 38.5 | 42.1 |      |
| 2153 | ST085667 |      | 46.0 | 63.3 |      |
| 2154 | ST085670 | 34.0 | 32.4 | 49.5 |      |
| 2155 | ST085671 | 69.4 | 86.5 |      |      |
| 2156 | ST085757 |      | 33.1 | 46.5 |      |
| 2157 | ST085760 |      | 36.6 | 40.9 |      |
| 2158 | ST085763 | 44.7 | 27.2 |      |      |
| 2159 | ST085775 | 25.5 | 38.6 |      |      |
| 2160 | ST085783 | 53.8 | 48.7 |      |      |
| 2161 | ST085788 |      | 41.7 |      | 45.6 |
| 2162 | ST085789 |      | 14.6 | 49.6 |      |
| 2163 | ST085801 |      | 0.3  |      | 42.3 |
| 2164 | ST085807 | 77.8 | 86.4 |      |      |
| 2165 | ST085820 | 4.8  | 25.2 |      |      |
| 2166 | ST085825 | 5.9  | 12.3 | 53.4 |      |
| 2167 | ST085828 | 16.0 | 14.0 |      |      |
| 2168 | ST085831 | 27.8 | 38.9 |      |      |
| 2169 | ST085868 |      | 17.1 |      |      |
| 2170 | ST085869 | 31.2 | 35.8 |      |      |
| 2171 | ST085906 | 20.4 | 41.5 |      |      |
| 2172 | ST085907 |      | 40.6 |      |      |
| 2173 | ST085913 | 5.1  | 25.3 |      |      |
| 2174 | ST085917 | 11.8 | 11.6 |      |      |
| 2175 | ST085923 | 42.7 | 39.0 |      |      |
| 2176 | ST086044 | 21.2 | 78.1 |      |      |
| 2177 | ST086048 |      | 15.3 |      |      |
| 2178 | ST086086 |      | 19.6 |      |      |
| 2179 | ST086088 |      | 46.7 |      |      |
| 2180 | ST086090 |      | 43.3 |      |      |
| 2181 | ST086091 |      | 22.7 |      |      |
| 2182 | ST086092 | 25.3 | 66.4 |      |      |
| 2183 | ST086108 |      | 18.3 |      |      |
| 2184 | ST086116 | 77.8 | 59.5 |      |      |
| 2185 | ST086117 |      | 10.0 |      |      |
| 2186 | ST086165 | 30.7 | 31.4 |      |      |
| 2187 | ST086169 |      | 3.5  |      |      |
| 2188 | ST086226 |      | 6.4  |      |      |

---

|      |          |      |      |       |       |
|------|----------|------|------|-------|-------|
| 2189 | ST086230 |      |      |       |       |
| 2190 | ST086238 | 31.6 | 31.5 |       |       |
| 2191 | ST086243 | 94.1 | 85.8 |       |       |
| 2192 | ST086259 | 23.5 | 24.8 |       |       |
| 2193 | ST086260 | 30.6 | 34.7 |       |       |
| 2194 | ST086315 | 3.7  |      |       |       |
| 2195 | ST086322 | 14.2 | 37.2 |       |       |
| 2196 | ST086350 |      | 35.2 |       |       |
| 2197 | ST086398 | 1.6  | 24.4 |       |       |
| 2198 | ST086401 | 5.8  | 7.4  |       |       |
| 2199 | ST086404 | 40.9 | 22.9 |       |       |
| 2200 | ST086422 | 34.8 | 46.3 | 60.9  |       |
| 2201 | ST086476 | 11.1 | 65.5 |       |       |
| 2202 | ST086477 |      | 0.2  |       |       |
| 2203 | ST086480 |      | 41.9 |       |       |
| 2204 | ST086485 |      | 8.6  |       |       |
| 2205 | ST086488 |      | 42.0 |       |       |
| 2206 | ST086489 | 92.5 | 92.4 | 103.7 | 105.5 |
| 2207 | ST086494 | 14.1 | 41.2 |       |       |
| 2208 | ST086496 |      | 35.0 |       |       |
| 2209 | ST086501 |      |      |       |       |
| 2210 | ST086505 |      | 59.0 |       |       |
| 2211 | ST086509 |      | 1.3  |       |       |
| 2212 | ST086510 |      | 14.4 |       |       |
| 2213 | ST086511 | 90.5 | 71.2 |       |       |
| 2214 | ST086512 |      | 39.0 |       |       |
| 2215 | ST086513 |      | 15.6 |       |       |
| 2216 | ST086530 | 16.8 | 62.2 |       |       |
| 2217 | ST086541 |      | 53.5 |       |       |
| 2218 | ST086591 |      |      |       |       |
| 2219 | ST086601 | 8.2  | 39.5 |       |       |
| 2220 | ST086620 | 56.5 | 30.1 |       |       |
| 2221 | ST086622 | 55.3 | 74.9 |       |       |
| 2222 | ST086712 |      |      |       |       |
| 2223 | ST086721 | 5.8  | 16.4 |       |       |
| 2224 | ST086741 | 27.5 | 55.6 |       |       |
| 2225 | ST086748 | 2.1  | 13.3 |       |       |
| 2226 | ST086886 | 21.9 | 56.0 |       |       |
| 2227 | ST086887 | 14.3 | 54.3 |       |       |
| 2228 | ST086948 | 10.5 | 30.9 |       |       |
| 2229 | ST086949 | 12.6 | 47.9 |       |       |
| 2230 | ST086950 | 55.7 | 72.6 |       |       |
| 2231 | ST086951 | 9.5  | 47.5 |       |       |
| 2232 | ST086964 | 17.2 | 56.2 |       |       |
| 2233 | ST086965 | 9.9  | 77.5 |       |       |
| 2234 | ST086966 |      | 60.0 |       |       |
| 2235 | ST086967 |      | 44.1 |       |       |
| 2236 | ST086968 |      | 35.7 |       |       |
| 2237 | ST086969 | 9.6  | 63.2 |       |       |
| 2238 | ST086988 |      |      |       |       |
| 2239 | ST087014 | 88.2 | 58.4 |       |       |

|      |          |      |      |      |      |
|------|----------|------|------|------|------|
| 2240 | ST087015 | 78.1 | 61.1 |      |      |
| 2241 | ST087016 | 57.9 | 68.9 |      |      |
| 2242 | ST087017 | 83.8 | 79.5 |      |      |
| 2243 | ST087018 | 78.0 | 64.1 |      |      |
| 2244 | ST087021 |      | 49.4 |      |      |
| 2245 | ST087031 |      | 36.4 |      |      |
| 2246 | ST087034 | 9.1  | 52.6 |      |      |
| 2247 | ST087043 | 28.5 | 62.6 |      |      |
| 2248 | ST087045 |      | 5.4  |      |      |
| 2249 | ST087062 |      |      |      |      |
| 2250 | ST087363 |      |      |      |      |
| 2251 | ST087792 |      | 43.0 |      |      |
| 2252 | ST087906 |      | 22.3 |      |      |
| 2253 | ST087910 |      | 47.0 |      |      |
| 2254 | ST087911 |      | 32.9 |      |      |
| 2255 | ST087915 |      | 21.5 |      |      |
| 2256 | ST087942 | 84.4 | 44.8 |      |      |
| 2257 | ST087943 | 63.3 | 55.1 |      |      |
| 2258 | ST087945 | 82.6 | 81.9 |      |      |
| 2259 | ST087947 | 92.8 | 83.1 |      |      |
| 2260 | ST087949 | 37.4 |      |      |      |
| 2261 | ST087968 |      | 35.3 |      |      |
| 2262 | ST087977 |      |      |      |      |
| 2263 | ST087979 |      | 36.1 |      |      |
| 2264 | ST087981 | 3.8  | 21.5 |      |      |
| 2265 | ST088013 | 49.9 | 50.2 |      |      |
| 2266 | ST088015 |      | 40.6 |      |      |
| 2267 | ST088036 |      | 17.7 |      |      |
| 2268 | ST088039 |      | 34.9 |      |      |
| 2269 | ST088060 |      | 7.2  |      |      |
| 2270 | ST088071 |      | 28.8 |      |      |
| 2271 | ST088072 |      | 41.1 |      |      |
| 2272 | ST088074 |      | 61.3 | 46.7 |      |
| 2273 | ST088080 |      | 21.8 | 40.3 |      |
| 2274 | ST088107 |      | 42.8 |      |      |
| 2275 | ST088110 | 19.1 | 60.7 |      |      |
| 2276 | ST088111 |      | 12.2 |      |      |
| 2277 | ST088169 |      | 23.6 |      |      |
| 2278 | ST088170 | 20.6 | 54.2 |      |      |
| 2279 | ST088176 | 58.4 | 61.8 |      |      |
| 2280 | ST088177 | 96.2 | 94.4 | 98.1 | 99.1 |
| 2281 | ST088185 |      | 18.2 |      |      |
| 2282 | ST088217 | 46.0 | 41.6 |      |      |
| 2283 | ST088220 |      |      |      |      |
| 2284 | ST088330 |      |      |      |      |
| 2285 | ST088333 | 93.4 | 99.0 | 99.0 | 99.3 |
| 2286 | ST088370 |      | 33.3 |      |      |
| 2287 | ST088379 |      | 4.9  |      |      |
| 2288 | ST088380 |      | 19.5 |      |      |
| 2289 | ST088381 |      | 37.9 |      |      |
| 2290 | ST088382 |      | 31.2 | 44.9 |      |



|      |          |      |      |      |       |
|------|----------|------|------|------|-------|
| 2291 | ST088393 | 80.1 | 66.4 |      |       |
| 2292 | ST088394 | 85.5 | 75.1 |      |       |
| 2293 | ST088395 | 93.9 | 83.9 |      |       |
| 2294 | ST088396 | 49.1 | 54.6 |      |       |
| 2295 | ST088397 | 62.3 | 48.5 |      |       |
| 2296 | ST088398 | 87.8 | 62.1 |      |       |
| 2297 | ST088399 | 87.3 | 86.6 |      |       |
| 2298 | ST088400 | 48.2 | 37.8 |      |       |
| 2299 | ST088401 | 94.6 | 87.1 |      |       |
| 2300 | ST088408 |      | 1.6  |      |       |
| 2301 | ST088409 |      | 12.4 |      |       |
| 2302 | ST088410 |      |      |      |       |
| 2303 | ST088411 |      | 19.5 |      |       |
| 2304 | ST088414 |      | 10.2 |      |       |
| 2305 | ST088437 |      | 58.2 |      |       |
| 2306 | ST088525 |      |      |      |       |
| 2307 | ST088527 | 98.8 | 98.6 |      |       |
| 2308 | ST088558 |      | 7.8  |      |       |
| 2309 | ST088560 |      | 51.7 |      |       |
| 2310 | ST088565 | 64.5 | 66.3 |      |       |
| 2311 | ST088566 | 61.8 | 80.5 |      |       |
| 2312 | ST088567 | 90.7 | 73.0 |      |       |
| 2313 | ST088568 |      | 26.2 |      |       |
| 2314 | ST088569 |      | 24.0 |      |       |
| 2315 | ST088588 |      | 35.6 |      |       |
| 2316 | ST088591 |      | 13.9 |      |       |
| 2317 | ST088594 |      | 25.8 |      |       |
| 2318 | ST088596 |      | 30.3 |      |       |
| 2319 | ST088597 |      | 23.5 |      |       |
| 2320 | ST088598 | 18.3 | 16.2 |      |       |
| 2321 | ST088600 | 10.5 |      |      | 56.6  |
| 2322 | ST088601 | 22.0 | 11.6 |      |       |
| 2323 | ST088602 |      | 28.4 |      | 45.5  |
| 2324 | ST088606 |      | 23.8 |      | 98.5  |
| 2325 | ST088608 |      | 23.6 |      | 101.3 |
| 2326 | ST088612 | 3.5  | 24.9 | 51.0 |       |
| 2327 | ST088623 | 12.2 | 60.8 |      |       |
| 2328 | ST088626 | 7.8  | 51.6 |      |       |
| 2329 | ST088627 | 2.9  | 11.5 |      | 98.1  |
| 2330 | ST088628 | 55.3 | 34.5 |      |       |
| 2331 | ST088633 |      | 2.3  |      |       |
| 2332 | ST088642 |      | 8.1  |      |       |
| 2333 | ST088645 |      | 7.1  |      |       |
| 2334 | ST088646 |      |      | 45.8 |       |
| 2335 | ST088654 |      | 12.6 |      |       |
| 2336 | ST088656 | 18.5 | 29.9 |      |       |
| 2337 | ST088657 | 15.0 | 25.9 |      |       |
| 2338 | ST088675 | 62.4 |      |      |       |
| 2339 | ST088690 | 18.5 | 10.0 |      |       |
| 2340 | ST088703 | 11.9 | 27.6 |      |       |
| 2341 | ST089008 |      | 12.3 | 46.5 |       |

---

|      |          |       |      |      |
|------|----------|-------|------|------|
| 2342 | ST089011 |       |      |      |
| 2343 | ST089016 |       | 12.9 |      |
| 2344 | ST089287 | 6.5   | 10.6 |      |
| 2345 | ST089303 | 37.9  | 26.6 |      |
| 2346 | ST089417 | 88.7  | 64.5 |      |
| 2347 | ST089418 | 59.3  | 45.4 |      |
| 2348 | ST089419 |       | 33.8 |      |
| 2349 | ST089420 | 16.9  | 8.3  |      |
| 2350 | ST090280 | 22.0  | 13.6 |      |
| 2351 | ST090282 | 28.5  | 15.4 |      |
| 2352 | ST090286 | 20.0  |      |      |
| 2353 | ST090287 |       | 5.6  |      |
| 2354 | ST090292 | 67.4  | 12.3 |      |
| 2355 | ST090299 | 23.1  | 17.8 |      |
| 2356 | ST090302 | 22.7  | 21.7 |      |
| 2357 | ST090304 | 16.8  |      |      |
| 2358 | ST090308 | 16.3  | 2.3  |      |
| 2359 | ST090309 |       | 5.5  |      |
| 2360 | ST090310 | 5.5   | 10.4 |      |
| 2361 | ST090311 | 53.5  | 1.4  |      |
| 2362 | ST090475 | 29.3  | 35.1 | 43.4 |
| 2363 | ST092008 | 35.4  | 26.0 |      |
| 2364 | ST092266 | 32.4  | 2.1  |      |
| 2365 | ST092267 | 28.6  | 48.2 |      |
| 2366 | ST092285 | 62.9  | 45.3 |      |
| 2367 | ST092286 |       |      | 53.6 |
| 2368 | ST092287 | 9.0   | 10.0 | 42.6 |
| 2369 | ST092291 |       |      |      |
| 2370 | ST092292 | 51.6  | 7.7  |      |
| 2371 | ST092293 | 85.7  | 95.3 |      |
| 2372 | ST092296 | 18.3  | 91.1 |      |
| 2373 | ST092297 | 18.9  |      |      |
| 2374 | ST092300 | 7.3   | 4.5  |      |
| 2375 | ST092303 | 3.1   | 15.8 |      |
| 2376 | ST092306 | 20.7  | 12.6 |      |
| 2377 | ST092309 |       | 16.2 |      |
| 2378 | ST092311 | 11.7  | 4.8  |      |
| 2379 | ST092317 | 0.4   |      |      |
| 2380 | ST092328 | 3.1   |      |      |
| 2381 | ST092330 | 15.2  |      |      |
| 2382 | ST092332 |       |      |      |
| 2383 | ST092333 | 17.5  |      |      |
| 2384 | ST092334 | 35.5  |      |      |
| 2385 | ST092335 | 7.3   | 15.3 | 98.2 |
| 2386 | ST092337 | 20.0  | 19.0 |      |
| 2387 | ST092338 |       | 18.4 |      |
| 2388 | ST092339 |       | 22.0 |      |
| 2389 | ST092340 | 102.5 | 97.7 | 94.1 |
| 2390 | ST092341 |       | 18.9 |      |
| 2391 | ST092343 | 24.5  | 5.0  |      |
| 2392 | ST092355 |       | 27.2 |      |

---

|      |          |      |      |       |       |
|------|----------|------|------|-------|-------|
| 2393 | ST092357 | 30.7 |      |       |       |
| 2394 | ST092359 |      | 17.6 |       |       |
| 2395 | ST092360 | 7.5  | 22.9 |       |       |
| 2396 | ST092364 |      | 24.2 |       |       |
| 2397 | ST092368 | 11.1 | 7.2  |       |       |
| 2398 | ST092369 |      | 13.8 |       |       |
| 2399 | ST092370 |      | 13.1 | 48.4  |       |
| 2400 | ST092373 |      | 0.7  |       |       |
| 2401 | ST092511 | 35.2 | 17.9 |       |       |
| 2402 | ST092512 | 26.4 | 18.7 |       |       |
| 2403 | ST092513 |      |      | 49.9  |       |
| 2404 | ST092552 | 24.8 | 49.8 |       |       |
| 2405 | ST092571 |      |      |       |       |
| 2406 | ST092572 | 16.6 |      |       |       |
| 2407 | ST092582 | 71.5 | 43.2 |       |       |
| 2408 | ST092584 | 62.5 | 5.8  |       |       |
| 2409 | ST092585 | 78.5 | 42.3 | 112.3 | 92.1  |
| 2410 | ST092586 | 71.2 | 25.0 |       |       |
| 2411 | ST092587 | 57.3 | 0.8  |       |       |
| 2412 | ST092601 |      |      |       |       |
| 2413 | ST092612 | 18.6 | 8.5  |       |       |
| 2414 | ST092622 | 6.3  |      |       |       |
| 2415 | ST092632 | 9.1  | 50.7 |       |       |
| 2416 | ST092652 | 22.4 | 18.9 |       |       |
| 2417 | ST092660 |      |      | 112.3 | 117.8 |
| 2418 | ST092677 |      |      | 42.3  |       |
| 2419 | ST092685 |      |      |       |       |
| 2420 | ST092688 |      |      |       |       |
| 2421 | ST092693 |      |      |       |       |
| 2422 | ST092696 |      | 69.0 |       |       |
| 2423 | ST092700 |      | 74.7 |       | 99.6  |
| 2424 | ST092701 |      | 2.5  | 44.3  |       |
| 2425 | ST092702 | 27.1 |      |       |       |
| 2426 | ST092703 | 12.4 |      |       |       |
| 2427 | ST092704 |      |      | 47.3  |       |
| 2428 | ST092705 |      |      |       | 47.0  |
| 2429 | ST092706 | 12.1 | 1.0  |       |       |
| 2430 | ST092707 | 10.1 | 0.1  |       |       |
| 2431 | ST092708 | 22.4 | 14.2 |       |       |
| 2432 | ST092710 | 10.5 | 41.4 |       |       |
| 2433 | ST092714 | 46.2 | 12.0 |       |       |
| 2434 | ST092719 | 12.6 |      |       |       |
| 2435 | ST092727 | 1.6  |      |       |       |
| 2436 | ST092737 |      | 3.7  |       |       |
| 2437 | ST092763 |      |      |       |       |
| 2438 | ST092764 |      |      | 51.1  |       |
| 2439 | ST092777 |      |      | 44.4  |       |
| 2440 | ST092778 | 42.9 |      | 43.3  |       |
| 2441 | ST092779 | 11.7 |      | 42.8  |       |
| 2442 | ST092780 | 12.8 |      | 68.2  |       |
| 2443 | ST092781 |      |      | 58.6  |       |

|      |          |      |       |       |       |
|------|----------|------|-------|-------|-------|
| 2444 | ST092782 | 4.8  | 4.8   | 61.2  |       |
| 2445 | ST092784 |      | 6.8   | 68.9  |       |
| 2446 | ST092785 |      | 8.4   | 40.9  |       |
| 2447 | ST092786 |      | 7.0   |       |       |
| 2448 | ST092787 | 1.2  | 22.0  |       |       |
| 2449 | ST092790 | 25.1 |       |       |       |
| 2450 | ST092791 | 56.1 | 16.8  |       |       |
| 2451 | ST092792 |      |       |       |       |
| 2452 | ST092793 | 15.8 | 58.9  | 59.5  |       |
| 2453 | ST092794 |      | 31.2  | 42.6  |       |
| 2454 | ST092795 |      |       |       |       |
| 2455 | ST092796 | 18.3 | 19.7  |       |       |
| 2456 | ST092823 | 71.3 | 62.9  |       |       |
| 2457 | ST092832 |      |       | 112.3 |       |
| 2458 | ST092833 |      |       | 53.0  |       |
| 2459 | ST092848 |      |       |       |       |
| 2460 | ST092850 | 50.0 | 20.5  |       |       |
| 2461 | ST092857 | 15.5 | 13.9  |       |       |
| 2462 | ST092863 |      |       | 66.7  |       |
| 2463 | ST092866 |      | 6.3   | 60.9  |       |
| 2464 | ST092870 | 39.9 |       | 52.0  |       |
| 2465 | ST092936 |      |       | 112.3 | 117.0 |
| 2466 | ST092942 | 49.4 | 23.9  |       |       |
| 2467 | ST092966 |      | 32.3  |       |       |
| 2468 | ST092971 | 58.2 | 37.7  | 102.7 |       |
| 2469 | ST092972 |      | 55.0  | 87.6  |       |
| 2470 | ST093057 | 88.4 | 78.0  | 77.5  |       |
| 2471 | ST093063 |      |       | 50.6  | 46.1  |
| 2472 | ST093084 |      | 107.2 | 48.6  |       |
| 2473 | ST093395 |      |       | 50.2  |       |
| 2474 | ST093424 |      |       |       |       |
| 2475 | ST093460 |      |       |       |       |
| 2476 | ST093461 |      |       |       |       |
| 2477 | ST093489 |      |       |       |       |
| 2478 | ST093526 |      |       |       |       |
| 2479 | ST093529 |      |       |       |       |
| 2480 | ST093534 |      |       | 55.8  |       |
| 2481 | ST093540 | 98.9 | 78.9  | 94.6  | 64.8  |
| 2482 | ST093559 |      |       |       | 44.3  |
| 2483 | ST093567 | 18.4 | 1.3   |       |       |
| 2484 | ST093576 |      |       |       |       |
| 2485 | ST093597 | 89.1 | 59.4  |       |       |
| 2486 | ST093631 |      | 1.1   |       |       |
| 2487 | ST093641 |      |       | 40.2  |       |
| 2488 | ST093686 | 33.6 | 35.7  |       |       |
| 2489 | ST093687 | 33.2 |       |       |       |
| 2490 | ST093688 |      |       |       |       |
| 2491 | ST093689 |      |       |       |       |
| 2492 | ST093690 |      |       |       |       |
| 2493 | ST093691 |      |       |       |       |
| 2494 | ST093693 |      |       |       |       |

|      |          |       |       |      |       |
|------|----------|-------|-------|------|-------|
| 2495 | ST093694 |       |       |      |       |
| 2496 | ST093695 | 59.3  | 43.4  |      | 53.8  |
| 2497 | ST093698 | 13.2  |       |      | 86.4  |
| 2498 | ST093700 |       |       |      |       |
| 2499 | ST093702 | 37.7  | 82.6  |      |       |
| 2500 | ST094679 |       |       | 42.0 |       |
| 2501 | ST094685 | 6.6   |       |      |       |
| 2502 | ST094732 | 13.9  | 7.2   |      |       |
| 2503 | ST094739 |       |       | 56.2 |       |
| 2504 | ST094749 | 1.5   |       |      |       |
| 2505 | ST094802 |       |       |      |       |
| 2506 | ST094804 |       |       |      |       |
| 2507 | ST094812 | 25.6  |       |      |       |
| 2508 | ST094815 |       |       |      |       |
| 2509 | ST094816 | 4.5   |       |      |       |
| 2510 | ST094817 |       |       |      |       |
| 2511 | ST094818 | 32.8  |       |      |       |
| 2512 | ST094820 | 55.7  | 1.1   |      |       |
| 2513 | ST094821 |       |       |      |       |
| 2514 | ST094822 |       |       |      |       |
| 2515 | ST094823 |       |       |      |       |
| 2516 | ST094824 |       |       |      |       |
| 2517 | ST094825 |       |       |      |       |
| 2518 | ST094828 |       |       |      |       |
| 2519 | ST094829 |       |       |      |       |
| 2520 | ST094832 |       |       |      |       |
| 2521 | ST094835 |       | 46.7  |      |       |
| 2522 | ST094845 |       | 7.0   |      |       |
| 2523 | ST094856 |       | 19.8  |      |       |
| 2524 | ST094858 |       |       |      |       |
| 2525 | ST094874 |       | 16.4  |      |       |
| 2526 | ST094877 | 18.7  | 45.3  |      |       |
| 2527 | ST094894 |       | 17.6  |      |       |
| 2528 | ST094936 | 7.3   | 25.6  |      |       |
| 2529 | ST094937 | 0.5   |       |      |       |
| 2530 | ST094938 |       |       |      |       |
| 2531 | ST094951 |       |       |      |       |
| 2532 | ST094971 |       | 12.2  |      |       |
| 2533 | ST094972 | 36.2  | 42.1  |      |       |
| 2534 | ST094973 | 34.2  | 43.8  |      |       |
| 2535 | ST094981 | 109.8 | 110.0 | 97.8 | 88.1  |
| 2536 | ST095092 | 81.3  | 35.8  |      |       |
| 2537 | ST095103 |       |       |      | 68.1  |
| 2538 | ST095117 |       | 35.0  |      |       |
| 2539 | ST095118 |       | 32.0  |      |       |
| 2540 | ST095119 | 13.5  | 50.1  |      |       |
| 2541 | ST095120 |       | 29.8  |      |       |
| 2542 | ST095121 |       | 50.5  |      |       |
| 2543 | ST095122 | 17.4  | 37.6  |      |       |
| 2544 | ST095123 | 5.2   | 41.5  |      |       |
| 2545 | ST095124 | 20.2  |       |      | 111.8 |

---

|      |          |       |       |       |       |
|------|----------|-------|-------|-------|-------|
| 2546 | ST095125 |       |       |       |       |
| 2547 | ST095126 |       |       |       |       |
| 2548 | ST095127 |       | 21.5  |       |       |
| 2549 | ST095128 |       | 31.0  | 55.6  |       |
| 2550 | ST095129 |       |       |       |       |
| 2551 | ST095130 |       | 7.9   |       |       |
| 2552 | ST095132 |       |       |       |       |
| 2553 | ST095133 |       |       |       |       |
| 2554 | ST095134 |       |       |       |       |
| 2555 | ST095135 |       |       |       |       |
| 2556 | ST095141 | 17.1  |       |       |       |
| 2557 | ST095142 |       |       |       |       |
| 2558 | ST095143 |       |       |       |       |
| 2559 | ST090257 | 16.5  |       |       |       |
| 2560 | ST095170 | 55.6  | 28.5  |       |       |
| 2561 | ST095176 |       |       |       |       |
| 2562 | ST095187 | 76.0  | 58.9  |       |       |
| 2563 | ST095189 | 105.7 | 76.5  |       |       |
| 2564 | ST095190 | 47.2  |       |       |       |
| 2565 | ST095191 | 52.6  |       |       |       |
| 2566 | ST095192 | 55.6  |       | 55.7  |       |
| 2567 | ST095193 | 58.3  |       | 48.0  |       |
| 2568 | ST095194 | 60.9  | 31.1  | 60.9  |       |
| 2569 | ST095195 |       | 8.9   |       |       |
| 2570 | ST095196 | 11.4  | 12.7  | 64.4  | 40.3  |
| 2571 | ST095197 | 38.5  |       |       |       |
| 2572 | ST095198 | 28.9  |       | 66.2  | 37.2  |
| 2573 | ST095199 | 64.1  |       |       |       |
| 2574 | ST095200 | 44.4  |       |       | 37.9  |
| 2575 | ST095201 | 43.0  |       |       |       |
| 2576 | ST095202 | 63.7  | 105.5 | 60.7  |       |
| 2577 | ST095206 |       |       | 113.1 |       |
| 2578 | ST095207 | 32.8  |       | 54.6  |       |
| 2579 | ST095208 | 40.6  |       | 51.8  |       |
| 2580 | ST095209 | 35.0  |       | 63.0  |       |
| 2581 | ST095210 | 43.5  |       |       |       |
| 2582 | ST095212 | 107.4 | 33.3  | 56.7  |       |
| 2583 | ST095283 | 26.4  |       | 75.3  |       |
| 2584 | ST095355 | 20.5  | 106.4 |       |       |
| 2585 | ST095378 |       |       | 88.4  |       |
| 2586 | ST095398 | 102.2 | 91.9  | 61.1  |       |
| 2587 | ST095408 | 22.0  | 49.7  |       |       |
| 2588 | ST095409 | 21.2  | 18.9  | 45.9  |       |
| 2589 | ST095410 | 13.3  |       | 58.5  |       |
| 2590 | ST095411 | 119.1 | 73.4  | 100.2 | 100.6 |
| 2591 | ST095412 | 87.1  | 83.8  |       |       |
| 2592 | ST095413 | 106.6 | 76.1  | 75.5  | 100.2 |
| 2593 | ST095414 | 57.2  | 61.0  |       | 83.6  |
| 2594 | ST095416 | 21.2  | 21.6  |       |       |
| 2595 | ST095417 | 113.5 | 77.7  | 97.3  | 102.3 |
| 2596 | ST095418 | 112.2 | 85.1  | 99.6  | 101.2 |

---

|      |          |       |       |       |      |
|------|----------|-------|-------|-------|------|
| 2597 | ST095419 |       |       |       |      |
| 2598 | ST095420 | 28.2  |       |       |      |
| 2599 | ST095443 |       | 25.6  | 54.4  |      |
| 2600 | ST095447 | 40.7  | 25.5  | 42.7  |      |
| 2601 | ST095471 | 83.8  | 60.3  | 60.3  |      |
| 2602 | ST095475 | 54.8  |       | 41.4  |      |
| 2603 | ST095499 | 52.1  | 4.5   |       |      |
| 2604 | ST095588 | 50.8  | 11.8  |       |      |
| 2605 | ST095590 | 64.3  | 28.7  |       |      |
| 2606 | ST095607 | 59.6  | 5.5   |       |      |
| 2607 | ST095617 | 59.7  | 38.6  |       |      |
| 2608 | ST095620 | 110.3 | 95.2  | 98.1  | 83.9 |
| 2609 | ST095636 |       | 33.2  | 64.1  |      |
| 2610 | ST095638 | 14.8  |       |       |      |
| 2611 | ST095639 | 4.9   | 30.9  |       |      |
| 2612 | ST095656 |       | 55.1  | 55.0  |      |
| 2613 | ST095663 | 48.0  | 62.5  | 50.3  |      |
| 2614 | ST095687 |       | 30.2  |       |      |
| 2615 | ST095688 | 22.0  | 64.5  |       |      |
| 2616 | ST095697 | 48.8  | 55.1  | 48.4  |      |
| 2617 | ST095706 |       | 17.6  |       |      |
| 2618 | ST095712 |       | 15.1  |       |      |
| 2619 | ST095719 | 27.0  | 26.1  |       |      |
| 2620 | ST095727 | 33.0  | 51.6  |       |      |
| 2621 | ST095729 |       | 37.6  |       |      |
| 2622 | ST095736 | 16.2  | 35.0  |       |      |
| 2623 | ST095747 |       | 50.9  |       |      |
| 2624 | ST095754 |       | 78.1  |       |      |
| 2625 | ST095759 |       | 72.5  |       |      |
| 2626 | ST095762 | 60.0  |       |       |      |
| 2627 | ST095765 |       |       | 44.6  |      |
| 2628 | ST095769 | 0.4   |       |       |      |
| 2629 | ST095784 |       |       | 51.3  |      |
| 2630 | ST095787 | 103.3 | 85.3  | 99.4  |      |
| 2631 | ST095788 | 100.8 | 90.3  | 100.3 | 99.6 |
| 2632 | ST095790 | 12.4  | 106.1 |       |      |
| 2633 | ST095791 | 52.9  |       |       |      |
| 2634 | ST095812 | 17.9  |       |       |      |
| 2635 | ST095820 | 60.2  |       |       |      |
| 2636 | ST000096 |       |       |       |      |
| 2637 | ST001576 | 2.8   |       | 53.4  |      |
| 2638 | ST001581 | 55.3  |       |       |      |
| 2639 | ST001592 | 8.2   | 15.9  | 63.0  |      |
| 2640 | ST001801 | 60.2  | 39.2  |       |      |
| 2641 | ST001804 | 12.7  | 72.3  |       |      |
| 2642 | ST002037 |       | 37.7  |       |      |
| 2643 | ST002230 |       | 44.0  |       |      |
| 2644 | ST002253 |       | 40.9  |       |      |
| 2645 | ST002382 |       | 60.2  |       |      |
| 2646 | ST002428 |       | 54.5  |       |      |
| 2647 | ST003500 |       | 53.7  |       |      |

|      |          |       |      |      |       |
|------|----------|-------|------|------|-------|
| 2648 | ST003847 |       | 58.9 | 82.4 |       |
| 2649 | ST003849 |       | 41.1 |      | 122.5 |
| 2650 | ST004308 |       | 2.6  |      |       |
| 2651 | ST004332 |       | 83.2 |      |       |
| 2652 | ST004647 |       | 18.6 |      |       |
| 2653 | ST004867 |       | 13.6 |      |       |
| 2654 | ST005060 |       | 32.1 |      |       |
| 2655 | ST005061 |       | 29.2 |      |       |
| 2656 | ST005181 | 112.0 | 60.7 |      |       |
| 2657 | ST005184 |       | 43.1 |      |       |
| 2658 | ST005187 |       | 26.4 |      |       |
| 2659 | ST005192 |       | 59.1 |      |       |
| 2660 | ST005196 |       | 48.4 |      |       |
| 2661 | ST005198 |       | 42.3 |      |       |
| 2662 | ST005212 |       | 51.3 |      |       |
| 2663 | ST005315 |       | 56.4 |      |       |
| 2664 | ST005480 | 110.5 | 81.0 |      |       |
| 2665 | ST006023 |       | 28.6 |      |       |
| 2666 | ST007136 |       | 90.8 |      |       |
| 2667 | ST007254 |       | 65.7 |      |       |
| 2668 | ST008188 |       | 50.8 |      |       |
| 2669 | ST008697 |       | 59.5 |      |       |
| 2670 | ST095428 |       | 33.0 |      |       |
| 2671 | ST008976 |       | 26.5 |      |       |
| 2672 | ST008977 |       | 47.7 | 88.3 |       |
| 2673 | ST012361 | 15.5  | 42.5 |      |       |
| 2674 | ST012879 | 10.7  |      |      |       |
| 2675 | ST012880 | 90.0  | 9.9  |      |       |
| 2676 | ST012881 | 11.9  | 40.5 |      |       |
| 2677 | ST012884 | 28.6  | 51.7 | 45.1 |       |
| 2678 | ST012890 |       | 40.7 |      |       |
| 2679 | ST015023 |       | 40.5 |      |       |
| 2680 | ST018286 |       | 62.8 |      |       |
| 2681 | ST018578 |       | 19.8 |      |       |
| 2682 | ST019440 |       | 44.0 |      |       |
| 2683 | ST019450 | 53.2  | 68.8 |      |       |
| 2684 | ST020193 |       | 62.7 |      |       |
| 2685 | ST020194 |       | 60.1 |      |       |
| 2686 | ST020197 |       | 45.8 |      |       |
| 2687 | ST020200 |       | 38.7 |      |       |
| 2688 | ST022011 |       | 41.4 |      |       |
| 2689 | ST022313 |       | 48.5 |      |       |
| 2690 | ST023605 |       | 27.5 |      | 47.2  |
| 2691 | ST023722 |       | 27.6 |      |       |
| 2692 | ST024011 |       | 34.3 |      |       |
| 2693 | ST024013 |       | 58.4 |      |       |
| 2694 | ST024026 |       | 49.1 |      |       |
| 2695 | ST024062 |       | 60.4 |      |       |
| 2696 | ST024087 | 14.9  | 82.7 | 47.7 |       |
| 2697 | ST024095 |       | 34.0 | 58.8 | 123.2 |
| 2698 | ST024096 | 13.4  |      | 46.5 |       |



|      |          |       |       |       |
|------|----------|-------|-------|-------|
| 2699 | ST025083 | 57.3  | 24.0  |       |
| 2700 | ST025101 | 37.1  | 27.1  |       |
| 2701 | ST025283 | 21.0  | 62.8  |       |
| 2702 | ST025320 | 28.6  | 39.4  |       |
| 2703 | ST025422 | 114.0 | 35.8  |       |
| 2704 | ST026558 | 111.3 | 62.2  |       |
| 2705 | ST026972 |       | 22.1  | 123.1 |
| 2706 | ST026983 |       | 12.5  |       |
| 2707 | ST028983 |       | 50.7  |       |
| 2708 | ST031675 |       | 21.1  |       |
| 2709 | ST032128 | 9.8   | 47.0  |       |
| 2710 | ST032142 |       | 47.4  |       |
| 2711 | ST033593 |       | 47.4  | 43.3  |
| 2712 | ST034304 |       | 106.2 |       |
| 2713 | ST034305 |       | 51.9  | 42.1  |
| 2714 | ST034307 | 33.3  | 22.6  |       |
| 2715 | ST034308 | 68.2  | 61.4  |       |
| 2716 | ST034309 | 45.1  | 20.0  |       |
| 2717 | ST034310 | 64.7  | 67.2  |       |
| 2718 | ST037430 | 39.5  | 33.1  |       |
| 2719 | ST037662 | 30.1  | 40.9  |       |
| 2720 | ST038384 | 108.2 | 59.3  |       |
| 2721 | ST038611 | 44.9  | 65.7  |       |
| 2722 | ST038698 | 50.0  | 69.7  | 41.0  |
| 2723 | ST038710 | 27.7  | 71.7  |       |
| 2724 | ST038711 | 70.8  | 72.4  | 56.4  |
| 2725 | ST038788 | 69.2  | 58.0  |       |
| 2726 | ST038790 | 43.6  | 61.3  |       |
| 2727 | ST038804 | 38.3  | 76.6  | 67.2  |
| 2728 | ST039159 | 71.4  | 64.8  |       |
| 2729 | ST039254 | 46.7  | 82.8  |       |
| 2730 | ST041685 | 55.2  | 73.0  |       |
| 2731 | ST041785 | 25.7  | 62.8  |       |
| 2732 | ST041790 | 18.1  | 55.3  |       |
| 2733 | ST041812 |       | 53.5  |       |
| 2734 | ST041828 | 30.8  | 53.7  | 61.8  |
| 2735 | ST041867 | 30.9  | 57.4  |       |
| 2736 | ST041868 | 90.5  | 63.2  |       |
| 2737 | ST041875 | 44.7  | 86.6  |       |
| 2738 | ST042005 | 77.5  | 97.1  |       |
| 2739 | ST043095 | 22.4  | 54.3  |       |
| 2740 | ST044296 | 25.5  | 49.9  |       |
| 2741 | ST044297 | 27.8  | 34.8  | 57.0  |
| 2742 | ST044904 |       | 48.8  |       |
| 2743 | ST045055 | 38.0  | 35.8  |       |
| 2744 | ST045201 | 82.1  | 30.7  |       |
| 2745 | ST045278 | 77.0  | 60.5  |       |
| 2746 | ST045447 | 20.8  | 48.2  |       |
| 2747 | ST045756 | 43.3  | 53.0  |       |
| 2748 | ST045815 | 32.5  | 40.5  |       |
| 2749 | ST045861 | 42.5  | 51.7  |       |

|      |          |       |       |      |       |
|------|----------|-------|-------|------|-------|
| 2750 | ST045862 | 59.6  | 43.7  |      |       |
| 2751 | ST045910 | 88.9  | 43.9  |      |       |
| 2752 | ST046012 | 109.9 | 33.8  |      |       |
| 2753 | ST046180 | 67.4  | 80.3  |      |       |
| 2754 | ST046819 | 21.2  | 81.2  |      |       |
| 2755 | ST046998 | 30.9  | 61.4  |      |       |
| 2756 | ST047698 | 43.8  | 71.7  |      |       |
| 2757 | ST047810 | 20.5  | 34.2  |      |       |
| 2758 | ST047895 | 58.9  | 87.1  |      |       |
| 2759 | ST048085 | 17.9  | 70.5  |      |       |
| 2760 | ST048321 | 103.7 | 85.2  | 98.2 | 88.2  |
| 2761 | ST048695 | 61.8  | 102.3 |      |       |
| 2762 | ST049570 | 8.9   | 81.8  |      |       |
| 2763 | ST050139 | 35.0  | 75.3  |      |       |
| 2764 | ST050168 | 42.7  | 84.8  |      |       |
| 2765 | ST050382 | 19.7  | 62.9  |      |       |
| 2766 | ST050825 |       | 62.2  |      |       |
| 2767 | ST050890 |       | 70.2  |      |       |
| 2768 | ST051122 | 20.7  | 76.4  | 40.7 |       |
| 2769 | ST051125 | 44.8  | 66.5  |      |       |
| 2770 | ST051508 | 54.3  | 64.9  |      |       |
| 2771 | ST051621 | 15.6  | 49.9  |      |       |
| 2772 | ST051725 | 35.6  | 60.6  |      |       |
| 2773 | ST051792 | 48.9  | 44.1  |      |       |
| 2774 | ST051832 | 33.3  | 57.4  | 44.1 |       |
| 2775 | ST051891 | 17.5  | 76.3  |      |       |
| 2776 | ST052085 | 31.9  | 52.6  |      |       |
| 2777 | ST053504 | 13.2  | 74.3  |      | 115.2 |
| 2778 | ST053665 |       | 60.8  |      |       |
| 2779 | ST053879 | 2.6   | 61.2  |      |       |
| 2780 | ST055531 | 45.5  | 52.8  |      |       |
| 2781 | ST056203 | 35.8  | 80.4  |      |       |
| 2782 | ST056930 | 103.0 | 94.4  | 53.1 | 85.5  |
| 2783 | ST057112 | 75.8  | 64.5  |      |       |
| 2784 | ST057647 | 90.5  | 80.2  |      |       |
| 2785 | ST058412 | 23.2  | 86.9  |      |       |
| 2786 | ST058451 | 12.0  | 32.2  |      |       |
| 2787 | ST059872 | 25.1  | 26.0  |      |       |
| 2788 | ST059957 | 27.9  | 35.5  |      |       |
| 2789 | ST060822 | 40.9  | 27.6  |      |       |
| 2790 | ST062138 | 33.7  | 17.5  |      |       |
| 2791 | ST063098 | 29.4  |       |      |       |
| 2792 | ST064877 | 29.0  | 30.3  |      |       |
| 2793 | ST067135 | 63.9  | 83.4  |      | 73.1  |
| 2794 | ST067355 | 30.6  | 78.3  |      |       |
| 2795 | ST067672 | 62.5  | 43.8  |      |       |
| 2796 | ST067700 | 67.6  | 53.9  |      |       |
| 2797 | ST067711 | 44.5  | 48.7  |      |       |
| 2798 | ST068062 | 72.3  | 38.4  |      |       |
| 2799 | ST068261 | 30.7  | 27.0  |      |       |
| 2800 | ST068262 | 55.3  | 27.2  |      |       |

|      |          |      |      |       |       |
|------|----------|------|------|-------|-------|
| 2801 | ST068290 |      | 9.2  |       |       |
| 2802 | ST068357 |      |      |       |       |
| 2803 | ST068825 |      |      |       |       |
| 2804 | ST069390 |      |      |       |       |
| 2805 | ST069392 | 3.8  |      |       |       |
| 2806 | ST069448 |      |      | 58.7  |       |
| 2807 | ST069459 |      |      |       |       |
| 2808 | ST070482 |      |      | 77.1  | 58.4  |
| 2809 | ST070784 |      | 68.4 |       |       |
| 2810 | ST070948 | 12.3 |      |       |       |
| 2811 | ST070950 | 45.6 | 39.3 | 54.0  |       |
| 2812 | ST070964 |      |      |       |       |
| 2813 | ST070969 | 4.0  |      |       |       |
| 2814 | ST070975 |      |      |       |       |
| 2815 | ST072434 |      | 4.5  | 48.3  | 46.0  |
| 2816 | ST072574 | 23.7 | 21.8 | 108.4 | 125.9 |
| 2817 | ST072626 |      | 41.4 |       |       |
| 2818 | ST072632 |      |      |       |       |
| 2819 | ST072644 |      |      |       |       |
| 2820 | ST072674 |      |      |       |       |
| 2821 | ST072700 |      |      |       |       |
| 2822 | ST072715 |      |      |       |       |
| 2823 | ST072754 | 53.9 | 10.7 |       |       |
| 2824 | ST072771 | 56.5 | 12.1 | 112.5 |       |
| 2825 | ST072787 | 38.3 | 16.1 |       |       |
| 2826 | ST072789 |      |      |       |       |
| 2827 | ST072790 |      |      |       |       |
| 2828 | ST072837 |      |      |       |       |
| 2829 | ST072853 | 11.4 |      |       |       |
| 2830 | ST073199 |      |      |       |       |
| 2831 | ST073264 |      |      |       |       |
| 2832 | ST073304 | 6.7  | 22.3 |       |       |
| 2833 | ST073324 | 56.1 | 18.3 |       |       |
| 2834 | ST073344 |      |      |       |       |
| 2835 | ST073377 |      |      |       |       |
| 2836 | ST073411 |      |      |       |       |
| 2837 | ST073523 |      |      |       |       |
| 2838 | ST073552 |      |      |       |       |
| 2839 | ST073598 | 13.0 |      |       |       |
| 2840 | ST073708 | 21.5 |      |       |       |
| 2841 | ST073730 | 6.4  | 15.3 |       |       |
| 2842 | ST073732 |      |      |       |       |
| 2843 | ST073735 |      |      | 50.5  |       |
| 2844 | ST073808 |      | 62.5 | 84.9  | 65.1  |
| 2845 | ST073935 |      |      |       |       |
| 2846 | ST074588 | 23.6 |      |       |       |
| 2847 | ST074621 |      |      |       |       |
| 2848 | ST074622 |      |      |       |       |
| 2849 | ST074623 | 1.5  |      |       |       |
| 2850 | ST074626 |      |      |       |       |
| 2851 | ST074899 |      |      |       |       |

---

|      |          |      |      |      |      |
|------|----------|------|------|------|------|
| 2852 | ST074924 |      |      |      |      |
| 2853 | ST074977 |      |      |      |      |
| 2854 | ST074982 |      |      |      |      |
| 2855 | ST075216 | 40.8 |      |      |      |
| 2856 | ST075219 |      | 19.5 |      |      |
| 2857 | ST075227 | 39.4 |      |      |      |
| 2858 | ST075585 |      |      | 46.2 |      |
| 2859 | ST075586 |      |      |      |      |
| 2860 | ST075616 |      |      |      |      |
| 2861 | ST075617 |      |      |      |      |
| 2862 | ST075618 |      |      |      |      |
| 2863 | ST075646 |      |      |      |      |
| 2864 | ST076085 | 3.7  |      | 84.9 |      |
| 2865 | ST076773 | 1.5  |      | 73.0 |      |
| 2866 | ST076961 |      |      | 53.6 |      |
| 2867 | ST076964 |      |      | 69.0 |      |
| 2868 | ST077033 | 46.3 | 10.0 |      |      |
| 2869 | ST077035 |      |      |      |      |
| 2870 | ST077129 |      |      |      |      |
| 2871 | ST077137 |      |      | 57.1 |      |
| 2872 | ST077139 | 38.2 | 53.0 | 76.0 |      |
| 2873 | ST077813 |      | 3.4  |      |      |
| 2874 | ST077819 |      | 9.6  |      |      |
| 2875 | ST077846 |      |      |      |      |
| 2876 | ST077849 | 6.3  |      |      |      |
| 2877 | ST078135 | 44.8 | 5.7  | 91.8 | 59.9 |
| 2878 | ST078149 |      |      |      |      |
| 2879 | ST078159 |      |      | 45.9 |      |
| 2880 | ST078887 |      |      | 61.0 |      |
| 2881 | ST079060 | 6.3  |      |      |      |
| 2882 | ST079063 | 4.9  | 78.9 |      |      |
| 2883 | ST079066 | 39.0 | 73.9 |      |      |
| 2884 | ST079081 | 37.5 | 32.3 |      |      |
| 2885 | ST079085 | 5.1  | 82.0 |      |      |
| 2886 | ST079100 | 5.2  | 36.2 |      |      |
| 2887 | ST079107 |      | 1.2  |      |      |
| 2888 | ST079110 | 35.0 | 34.2 |      |      |
| 2889 | ST079112 |      |      |      |      |
| 2890 | ST079113 |      | 24.3 |      |      |
| 2891 | ST079117 |      | 27.1 |      |      |
| 2892 | ST079123 |      | 27.1 |      |      |
| 2893 | ST079127 | 0.9  | 16.1 |      |      |
| 2894 | ST079134 |      | 55.4 |      |      |
| 2895 | ST079689 | 8.9  | 38.7 |      |      |
| 2896 | ST079962 | 94.5 | 91.2 |      |      |
| 2897 | ST080013 | 6.0  | 82.1 |      |      |
| 2898 | ST080046 | 3.0  | 9.7  |      |      |
| 2899 | ST080093 | 16.8 | 56.2 |      |      |
| 2900 | ST080605 | 7.3  | 68.6 |      |      |
| 2901 | ST080893 | 40.2 | 98.4 |      |      |
| 2902 | ST081445 | 41.6 | 73.0 |      |      |

|      |          |      |       |       |      |
|------|----------|------|-------|-------|------|
| 2903 | ST081447 | 43.8 | 58.3  |       |      |
| 2904 | ST081450 | 86.4 | 98.0  |       |      |
| 2905 | ST081454 | 37.9 | 28.7  |       |      |
| 2906 | ST081455 | 27.6 | 13.7  |       |      |
| 2907 | ST081457 | 11.6 |       |       |      |
| 2908 | ST081459 | 46.0 | 76.7  |       |      |
| 2909 | ST081483 | 12.1 | 99.9  |       |      |
| 2910 | ST081488 | 26.4 | 25.5  |       |      |
| 2911 | ST081490 | 59.6 | 54.8  |       |      |
| 2912 | ST081565 | 13.0 | 31.6  |       |      |
| 2913 | ST081583 | 52.9 | 37.4  |       |      |
| 2914 | ST081608 | 34.7 | 86.1  |       |      |
| 2915 | ST081613 | 74.9 | 71.9  |       |      |
| 2916 | ST081723 | 19.7 | 98.3  |       |      |
| 2917 | ST082265 | 13.7 | 89.7  |       |      |
| 2918 | ST082303 | 22.4 | 35.5  |       |      |
| 2919 | ST082304 | 43.2 | 57.4  |       |      |
| 2920 | ST082306 | 94.8 | 38.6  |       |      |
| 2921 | ST082314 | 13.3 |       |       |      |
| 2922 | ST082323 | 36.6 | 21.5  |       |      |
| 2923 | ST082327 | 59.6 | 45.8  |       |      |
| 2924 | ST082429 | 11.2 | 29.3  |       |      |
| 2925 | ST082848 | 35.4 | 56.6  |       |      |
| 2926 | ST082886 | 17.8 | 42.8  |       |      |
| 2927 | ST083082 | 13.2 | 66.8  |       |      |
| 2928 | ST083084 | 14.2 | 21.8  |       |      |
| 2929 | ST083085 | 11.2 | 60.6  |       |      |
| 2930 | ST083391 | 72.8 | 74.7  |       |      |
| 2931 | ST083392 | 12.5 | 0.4   |       |      |
| 2932 | ST083398 | 28.0 | 9.3   |       |      |
| 2933 | ST083439 | 36.1 | 30.0  |       |      |
| 2934 | ST083715 | 31.5 | 42.1  |       |      |
| 2935 | ST083850 | 7.2  | 49.1  |       |      |
| 2936 | ST083877 | 19.5 |       |       |      |
| 2937 | ST083914 | 74.0 | 19.8  |       |      |
| 2938 | ST083925 | 17.3 | 31.0  |       |      |
| 2939 | ST084063 |      | 33.2  |       |      |
| 2940 | ST084155 | 10.4 | 38.3  |       |      |
| 2941 | ST084235 | 48.6 | 61.1  |       |      |
| 2942 | ST084271 | 18.1 | 41.8  |       |      |
| 2943 | ST084423 | 24.1 | 69.7  |       |      |
| 2944 | ST084442 | 97.7 | 95.8  | 101.0 | 64.7 |
| 2945 | ST084458 | 28.0 | 14.5  |       |      |
| 2946 | ST084469 | 86.9 | 91.9  | 62.7  |      |
| 2947 | ST084474 | 2.0  | 35.1  |       |      |
| 2948 | ST084517 | 17.9 | 72.6  |       |      |
| 2949 | ST084526 | 42.6 | 101.0 |       |      |
| 2950 | ST084623 |      | 36.2  |       |      |
| 2951 | ST084658 | 19.6 | 65.8  |       |      |
| 2952 | ST084742 | 47.7 | 33.9  |       |      |
| 2953 | ST084926 | 57.4 | 21.8  |       |      |

|      |          |      |      |      |       |
|------|----------|------|------|------|-------|
| 2954 | ST084956 | 18.5 | 29.9 |      |       |
| 2955 | ST085054 | 14.3 | 34.9 |      |       |
| 2956 | ST085098 | 52.6 | 41.3 |      |       |
| 2957 | ST085304 | 78.6 |      |      |       |
| 2958 | ST085314 | 81.7 | 89.9 |      |       |
| 2959 | ST085342 | 25.5 | 11.8 |      |       |
| 2960 | ST085343 | 15.6 | 39.0 |      |       |
| 2961 | ST085502 | 41.9 | 36.8 |      | 56.6  |
| 2962 | ST085508 | 26.7 | 45.7 |      |       |
| 2963 | ST085623 | 2.8  |      | 40.4 | 45.5  |
| 2964 | ST085684 | 98.6 | 95.4 |      | 98.5  |
| 2965 | ST085690 | 96.1 | 82.0 | 83.5 | 101.3 |
| 2966 | ST085855 | 54.0 | 55.0 |      |       |
| 2967 | ST085897 | 92.7 | 69.1 |      |       |
| 2968 | ST085899 | 90.1 | 84.6 |      |       |
| 2969 | ST085955 | 97.0 | 96.9 | 98.3 | 98.1  |
| 2970 | ST086020 | 54.0 | 83.7 |      |       |
| 2971 | ST086022 | 35.5 | 78.7 |      |       |
| 2972 | ST086025 |      | 70.3 |      |       |
| 2973 | ST086026 | 40.4 |      |      |       |
| 2974 | ST086028 |      | 47.9 |      |       |
| 2975 | ST086041 |      | 53.5 |      |       |
| 2976 | ST086527 |      | 34.7 |      |       |
| 2977 | ST086528 | 32.5 | 67.6 |      |       |
| 2978 | ST086529 |      | 29.8 |      |       |
| 2979 | ST086531 | 14.3 | 59.8 |      |       |
| 2980 | ST086532 |      | 61.2 |      |       |
| 2981 | ST086533 |      | 41.2 |      |       |
| 2982 | ST086534 | 74.8 | 95.1 |      |       |
| 2983 | ST086538 | 62.7 | 74.0 |      |       |
| 2984 | ST086539 | 11.8 | 47.3 |      |       |
| 2985 | ST086540 | 22.8 | 65.8 |      |       |
| 2986 | ST086542 |      | 54.1 |      |       |
| 2987 | ST086543 |      | 52.6 |      |       |
| 2988 | ST086544 | 19.0 | 46.2 |      |       |
| 2989 | ST086545 | 8.4  | 44.5 |      |       |
| 2990 | ST086563 | 52.1 | 79.8 |      |       |
| 2991 | ST086627 | 9.3  | 65.2 |      |       |
| 2992 | ST086881 |      | 65.2 |      |       |
| 2993 | ST086882 |      | 19.3 |      |       |
| 2994 | ST087186 |      | 31.6 |      |       |
| 2995 | ST088307 |      | 38.6 | 40.1 |       |
| 2996 | ST088496 | 9.3  | 40.1 |      |       |
| 2997 | ST088501 |      | 52.0 |      |       |
| 2998 | ST088502 | 6.1  | 80.2 |      |       |
| 2999 | ST088503 |      | 89.2 | 52.7 |       |
| 3000 | ST088505 | 13.9 | 38.2 | 41.7 |       |
| 3001 | ST088506 | 20.6 | 48.5 |      |       |
| 3002 | ST088508 |      | 33.6 |      |       |
| 3003 | ST088509 |      | 51.9 |      |       |
| 3004 | ST088515 |      | 54.3 |      |       |

|      |          |      |      |      |      |
|------|----------|------|------|------|------|
| 3005 | ST088771 | 12.0 | 55.1 |      |      |
| 3006 | ST088843 |      | 72.9 |      |      |
| 3007 | ST088851 |      | 20.1 |      |      |
| 3008 | ST088858 | 32.3 | 59.1 |      |      |
| 3009 | ST088864 | 46.6 | 67.6 |      |      |
| 3010 | ST088865 | 39.5 | 61.7 |      |      |
| 3011 | ST088869 | 44.1 | 37.3 |      |      |
| 3012 | ST088881 |      | 55.8 |      |      |
| 3013 | ST088882 |      | 59.1 |      |      |
| 3014 | ST088922 |      | 55.9 |      |      |
| 3015 | ST088925 |      | 41.0 | 41.8 |      |
| 3016 | ST088939 | 3.5  | 59.5 |      |      |
| 3017 | ST088940 | 25.1 | 74.4 |      |      |
| 3018 | ST088945 | 16.7 | 66.0 |      |      |
| 3019 | ST088947 | 59.7 | 62.2 |      |      |
| 3020 | ST088948 |      | 62.1 |      |      |
| 3021 | ST088949 | 52.4 | 68.6 |      |      |
| 3022 | ST088966 | 21.4 | 61.8 |      |      |
| 3023 | ST088973 | 12.2 | 54.3 |      |      |
| 3024 | ST088975 | 37.6 | 56.7 |      |      |
| 3025 | ST088977 | 89.9 | 98.6 | 58.1 | 98.2 |
| 3026 | ST088994 | 4.9  | 2.8  |      |      |
| 3027 | ST088996 | 33.9 | 9.7  |      |      |
| 3028 | ST088998 |      | 35.6 | 43.0 |      |
| 3029 | ST089001 | 43.7 | 56.5 |      |      |
| 3030 | ST089053 | 30.9 |      |      |      |
| 3031 | ST089073 | 9.3  | 7.9  |      |      |
| 3032 | ST089108 | 54.3 |      |      |      |
| 3033 | ST089109 | 33.7 | 64.9 |      |      |
| 3034 | ST089117 | 26.6 | 65.4 |      |      |
| 3035 | ST089133 | 43.0 | 52.3 |      |      |
| 3036 | ST089209 |      | 52.6 | 44.0 |      |
| 3037 | ST090252 | 65.1 | 76.7 |      |      |
| 3038 | ST090254 | 47.5 | 73.4 |      |      |
| 3039 | ST090255 | 8.4  | 47.7 |      |      |
| 3040 | ST090256 | 51.4 |      |      |      |
| Que  |          | 99.7 | 98.9 |      |      |

**Supplementary table 4.** Compound codes and IUPAC names of the highly active compounds identified in primary screening.

| Cpd  | Compound code (supplier) and IUPAC name                                                                                                                                                                                             |
|------|-------------------------------------------------------------------------------------------------------------------------------------------------------------------------------------------------------------------------------------|
| 144  | <b>ST012391</b><br>8-(4-amino-2-oxohydropyrimidinyl)-3-hydroxy-6-(hydroxymethyl)-2,4,7-trioxa-3-phosphabicyclo[3.3.0]octan-3-one                                                                                                    |
| 339  | <b>ST024776</b><br>(2S,5R,6R)-3,3-dimethyl-7-oxo-6-(2-phenylacetyl-amino)-4-thia-1-azabicyclo[3.2.0]heptane-2-carboxylic acid, {2-[(4-aminophenyl)methoxy]ethyl}diethylamine, hydrate                                               |
| 341  | <b>ST024784</b><br>2-[1-(bromomethyl)vinyl]-8,9-dimethoxy-1,2-dihydrochromano[3,4-b]furano[2,3-h]chroman-6-one                                                                                                                      |
| 575  | <b>ST045414</b><br>6-chloro-3-hydroxy-2-(3-pyridyl)chromen-4-one                                                                                                                                                                    |
| 916  | <b>ST069294</b><br>6,7-dihydroxy-2-phenylchromen-4-one                                                                                                                                                                              |
| 1698 | <b>ST077117</b><br>2-[(6-{4-[(6S,1R,5R)-6-(4-hydroxy-3-methoxyphenyl)-3,7-dioxabicyclo[3.3.0]oct-2-yl]-2-methoxyphenoxy}-3,4,5-trihydroxy(2H-3,4,5,6-tetrahydropyran-2-yl))methoxy]-6-methyl-2H-3,4,5,6-tetrahydropyran-3,4,5-triol |
| 2117 | <b>ST083092</b><br>2-(2-chlorophenyl)-4-oxochromen-3-yl propanoate                                                                                                                                                                  |
| 2307 | <b>ST088527</b><br>4-indol-3-yl-5-methyl-1,3-thiazole-2-ylamine                                                                                                                                                                     |
| 2896 | <b>ST079962</b><br>2-(4-methoxyphenyl)-4-oxochromen-3-yl decanoate                                                                                                                                                                  |



**Supplementary figure 1.** Effects of the lead compounds (at 100 and 400  $\mu$ M) on bacterial growth after 24 hours of incubation. Results are presented as mean  $\pm$  SD, n = 3.

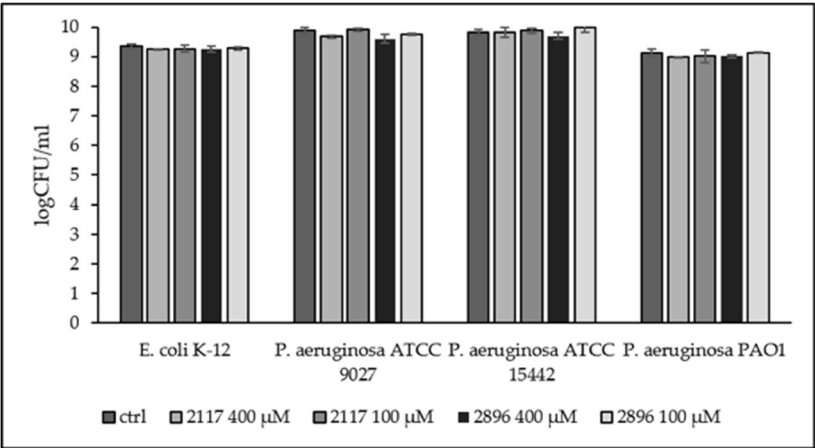

Supplement: s1 [file s1]
